# Supplementary material for: Electrochemistry-enabled Rh-catalyzed regioselective [4 + 1] and [4 + 2] cycloaddition of benzoic acid with alkynyl esters/amides
Source: Royal Society of Chemistry journal article supplement (doi:10.1039/d4gc03753g), 2024-01-01
Supplement: d4gc03753g1.pdf [file d4gc03753g1.pdf]

## Supplementary Information

### Electrochemistry-Enabled Rh-Catalyzed Regioselective [4+1] and [4+2] Cycloaddition Reactions of Benzoic Acid with Alkynyl Esters/Amides

Wei-Jung Chiu<sup>a</sup>, Chung-Ming Sun<sup>a,b\*</sup>

<sup>a</sup> Department of Applied Chemistry, 1001 Ta-Hseuh Road, National Yang-Ming Chiao Tung University, Hsinchu 300-10, Taiwan, ROC

<sup>b</sup> Department of Medicinal and Applied Chemistry, Kaohsiung Medical University, 100, Shih-Chuan 1st Road, Kaohsiung 807-08, Taiwan, ROC

E-mail: cmsun@nycu.edu.tw

#### Table of contents

|                                                               |           |
|---------------------------------------------------------------|-----------|
| <b>1. General Information.....</b>                            | <b>2</b>  |
| <b>2. Analytical Methods .....</b>                            | <b>2</b>  |
| <b>3. General procedure for synthesis of 2 .....</b>          | <b>2</b>  |
| <b>4. Graphical Guide for the electrochemical setup .....</b> | <b>3</b>  |
| <b>5. Cyclic Voltammetry Studies .....</b>                    | <b>3</b>  |
| <b>7. General procedure for synthesis of 4a.....</b>          | <b>5</b>  |
| <b>8. Mechanistic Study .....</b>                             | <b>6</b>  |
| <b>9. Characterization Data of 3a-4j .....</b>                | <b>10</b> |
| <b>10. Spectral Data of 3a-4j .....</b>                       | <b>21</b> |
| <b>11. X-Ray Crystallographic Data .....</b>                  | <b>63</b> |

## 1. General Information

All the electrochemical oxidations were performed in an undivided cell equipped with a platinum electrode ( $1.0 \times 1.5 \text{ cm}^2$ ) unless otherwise noted. All reactions were carried out in oven-dried round bottoms. All other chemicals were purchased from Sigma-Aldrich and TCI and used as received. All the solvents were distilled before use.

## 2. Analytical Methods

Analytical thin-layer chromatography (TLC) was performed using 0.25mm silica gel coated plates. Flash chromatography was performed using the indicated solvent and silica gel 60 (230-400 mesh).  $^1\text{H}$  NMR and  $^{13}\text{C}$  NMR spectra were recorded on 400 MHz spectrometers. Chemical shifts are reported in parts per million (ppm) on the  $\delta$  scale from an internal standard (TMS). Chemical shifts were expressed in parts per million ( $\delta$ ) downfield from d (doublet), t (triplet), dd (doublets of doublet), dt (doublets of triplet), and m (multiplet). Components were visualized by observation under UV light (254 and 365 nm). High resolution mass spectra (HRMS) were recorded in ESI mode using TOF mass spectrometer. The benzoic acids were purchased from commercial sources.

## 3. General procedure for synthesis of 2

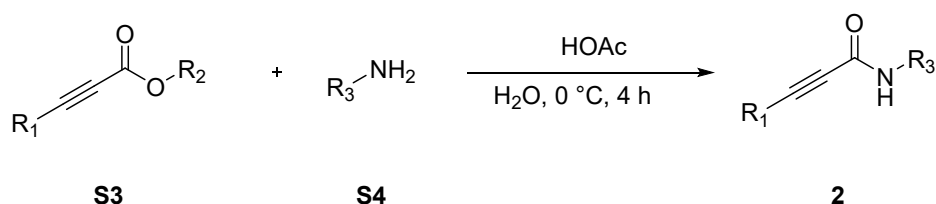

To a solution of alkyl amine **S4** (1.2 equiv.) in 5 mL, alkyne ester **S3** (1 equiv.) was added dropwise at 0 °C for 30 min. The mixture was stirred for 2 h at 0 °C, and then a few drops of acetic acid were added. The mixture was stirred for another 2h and saturated with NaCl, followed by extraction with ethyl acetate ( $3 \times 10 \text{ mL}$ ), dried over  $\text{MgSO}_4$ , then the residue was separated by silica gel chromatography with hexane/ethyl acetate (1:1) to obtain the desired alkyne amide **2** in 66-78% yield.

#### 4. Graphical Guide for the electrochemical setup

For electrolysis, use a three-neck flask with a capacity of 25 mL. Insert the platinum electrode ( $1.0 \times 1.5 \text{ cm}^2$ , from LEDONLAB) and platinum wire into the three-neck flask. Install a condenser and a magnetic stirring rod on the reaction flask containing the reaction mixture. Use a Gopher cps-3205 DC power supply as the power source.

Figure S1. Reaction setup.

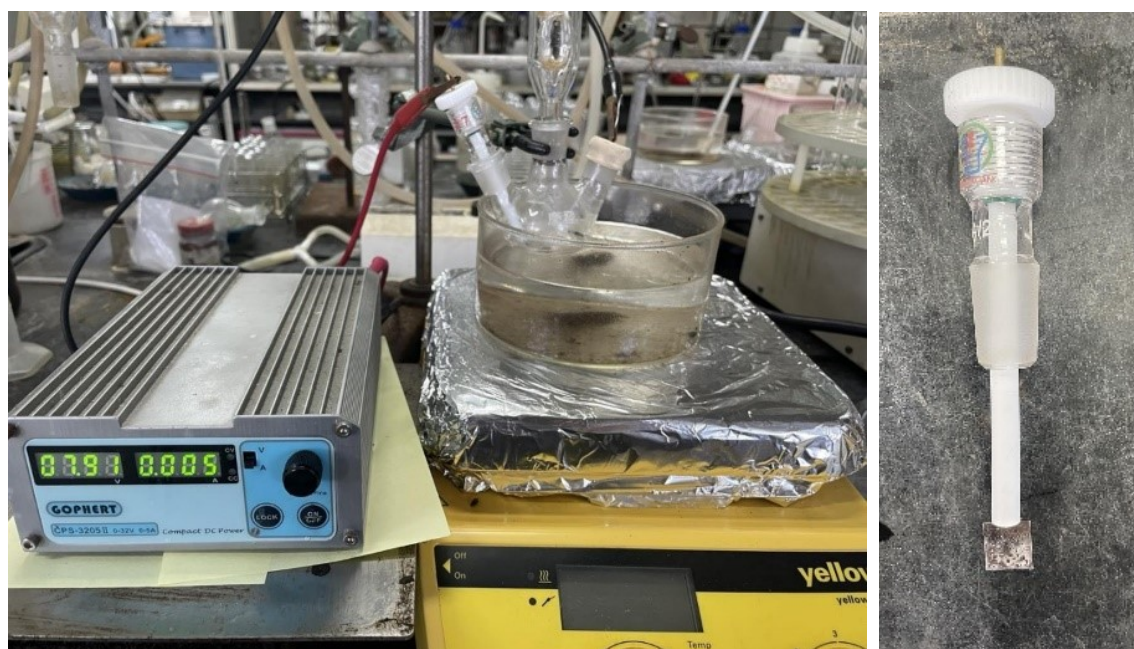

#### 5. Cyclic Voltammetry Studies

The cyclic voltammograms were recorded on a Biologic VSP-3e instrument using a Pt electrode ( $1.0 \times 1.5 \text{ cm}^2$ , from LEDONLAB) and a Pt wire, with an SCE reference electrode, at a scan rate of  $100 \text{ mV/s}$ .

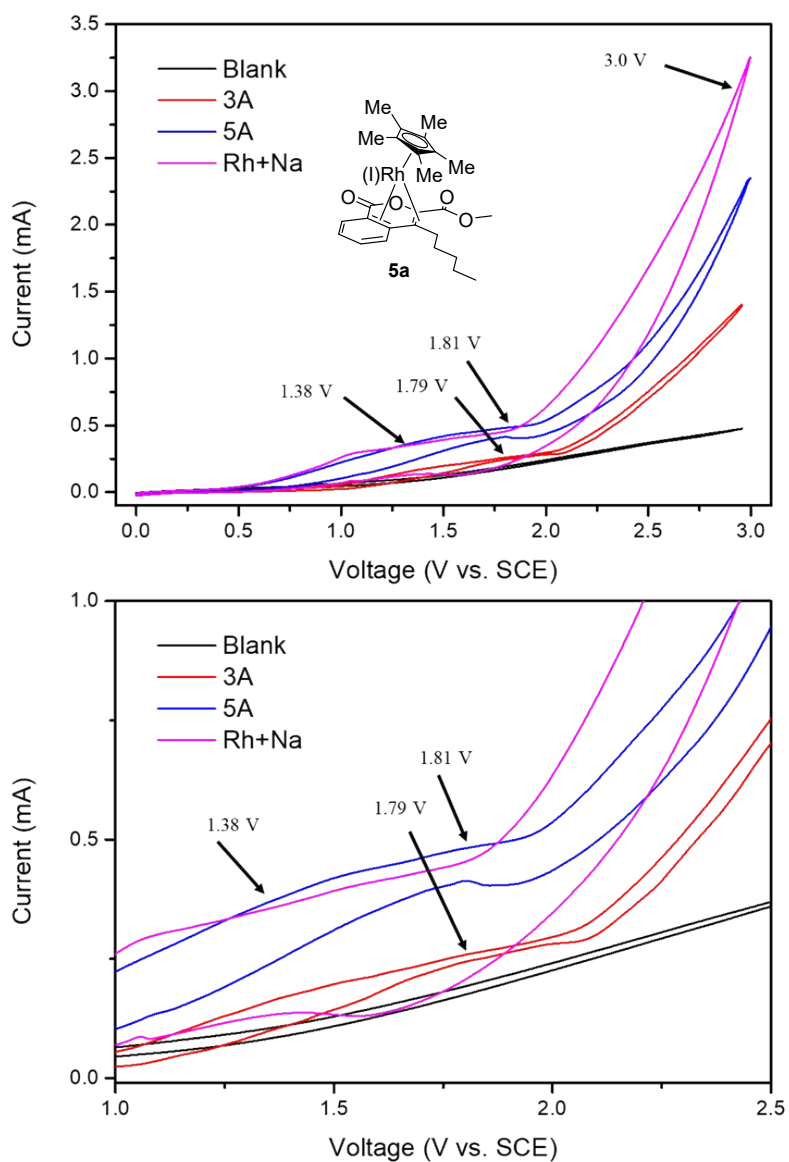

**Figure S2.** Cyclic voltammograms measured in MeOH, containing 0.1 M <sup>n</sup>Bu<sub>4</sub>NPF<sub>6</sub> as the supporting electrolyte. NaOAc was used as the additive. SCE was used as the reference electrode. a) background. b) **3a** (3 mM). c) **5a** (3 mM) d) [Cp\***RhCl**<sub>2</sub>]<sub>2</sub> (3 mM).

## 6. General procedure for synthesis of 3a

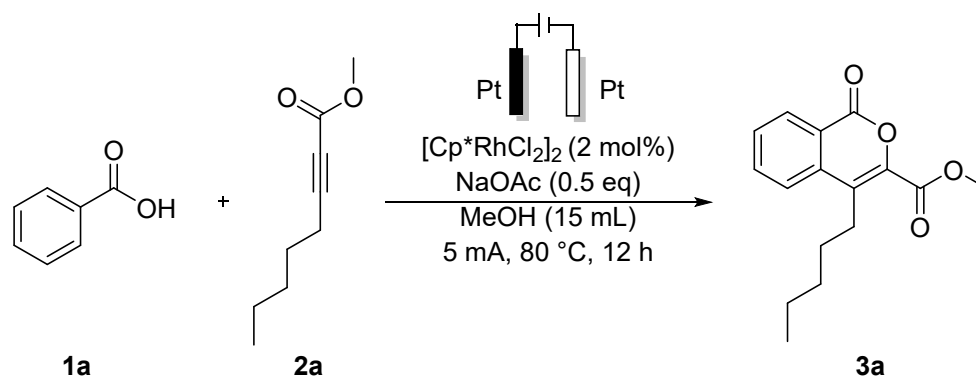

To an oven-dried 25 mL round bottom equipped with magnetic stir bar, **1a** (200 mg, 1.64 mmol), methyl oct-2-ynoate **2a** (303 mg, 1.97 mmol),  $[\text{Cp}^*\text{RhCl}_2]_2$  (20 mg, 2.0 mol%) and NaOAc (67.0 mg, 0.82 mmol) were dissolved in MeOH (15.0 mL). The resulting solution was stirred at 80 °C for 12 h in an undivided cell with a Pt electrodes ( $1.0 \times 1.5 \text{ cm}^2$ ) and a Pt wire by applying 5.0 mA constant current. After removal of the solvent under reduced pressure, purification was performed by flash column chromatography on silica gel with hexane/ethyl acetate (10:1) as eluent to afford corresponding products.

## 7. General procedure for synthesis of 4a

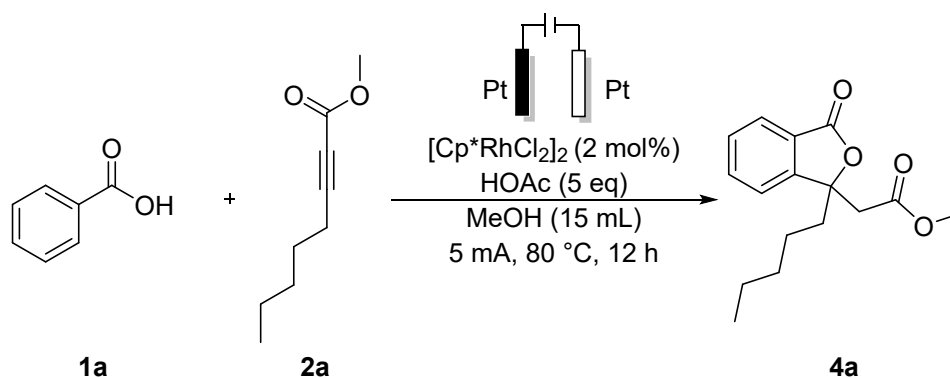

To an oven-dried 25 mL round bottom equipped with magnetic stir bar, **1a** (200 mg, 1.64 mmol), methyl oct-2-ynoate **2a** (303 mg, 1.97 mmol),  $[\text{Cp}^*\text{RhCl}_2]_2$  (20 mg, 2.0 mol%) and HOAc (492 mg, 8.2 mmol) were dissolved in MeOH (15.0 mL). The

resulting solution was stirred at 80 °C for 12 h in an undivided cell with a Pt electrode (1.0 × 1.5 cm<sup>2</sup>) and a Pt wire by applying 5.0 mA constant current. After removal of the solvent under reduced pressure, purification was performed by flash column chromatography on silica gel with hexane/ethyl acetate (6:1) as eluent to afford corresponding products.

## 8. Mechanistic Study

Deuterium exchange

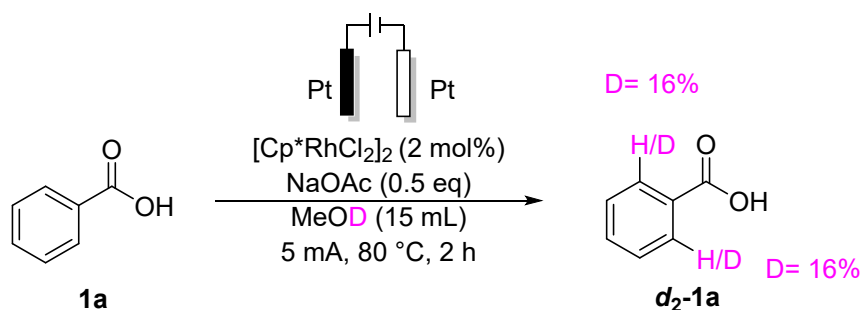

To an oven-dried 25 mL round bottom equipped with magnetic stir bar, **1a** (200 mg, 1.64 mmol), [Cp<sup>\*</sup>RhCl<sub>2</sub>]<sub>2</sub> (20 mg, 2.0 mol%) and NaOAc (67.0 mg, 0.82 mmol) were dissolved in MeOD (15.0 mL). The resulting solution was stirred at 80 °C for 2 h in an undivided cell with a Pt electrode (1.0 × 1.5 cm<sup>2</sup>) and a Pt wire by applying 5.0 mA constant current. After removal of the solvent under reduced pressure, purification was performed by flash column chromatography on silica gel with hexane/ethyl acetate (6:1) as eluent to afford corresponding products. The H/D exchange was found to be 16 % at the protons attached to C-2' and C-6' in the recovered **d<sub>2</sub>-1a**.

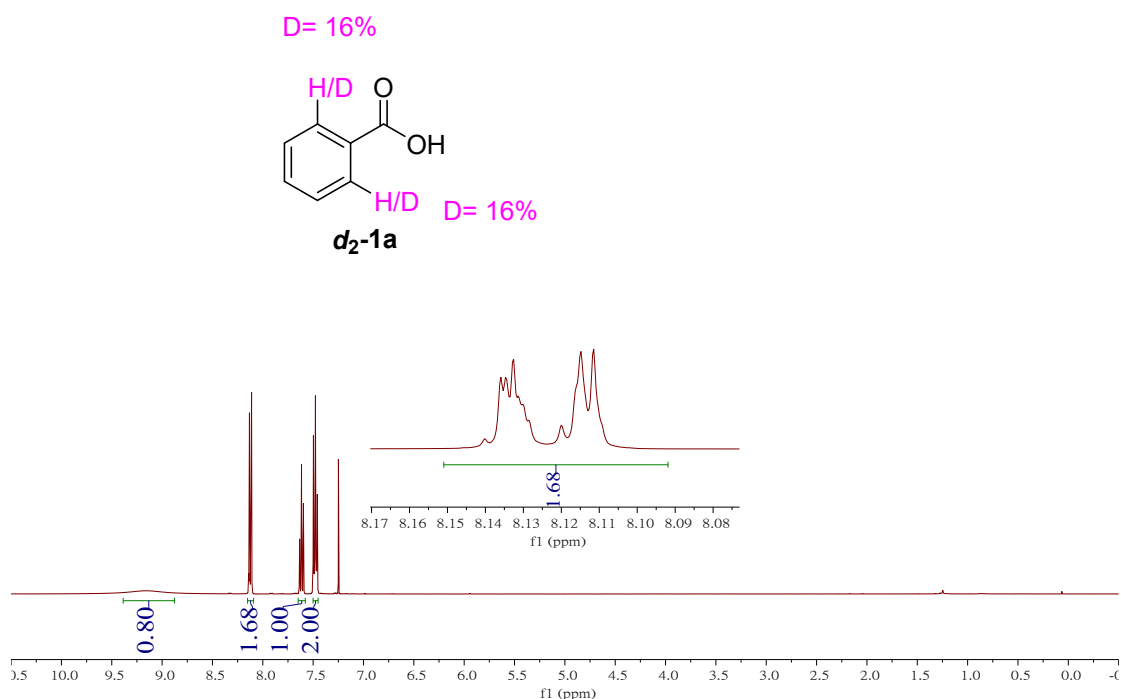

## (2) Competition KIE study

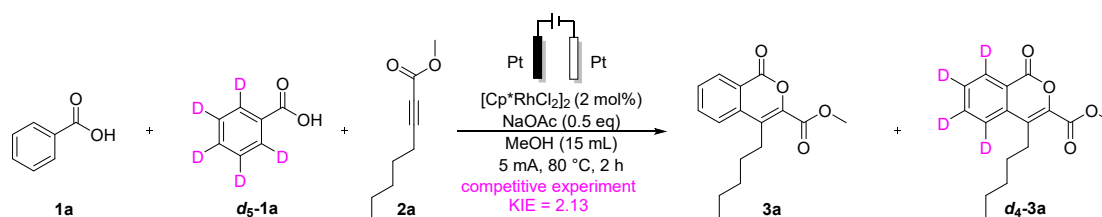

To an oven-dried 25 mL round bottom equipped with magnetic stir bar, **1a** (100 mg, 0.82 mmol) and **1a-d<sub>5</sub>** (101mg, 0.82 mmol), methyl oct-2-ynoate **2a** (303 mg, 1.97 mmol), [Cp\*RhCl<sub>2</sub>]<sub>2</sub> (20 mg, 2.0 mol%) and NaOAc (67.0 mg, 0.82 mmol) were dissolved in MeOH (15.0 mL). The resulting solution was stirred at 80 °C for 2 h in an undivided cell with a Pt electrode (1.0 × 1.5 cm<sup>2</sup>) and a Pt wire by applying 5.0 mA constant current. by applying 5.0 mA constant current. The solvent was then removed under reduced pressure and purification was performed by flash column chromatography on silica gel with hexane/ethyl acetate (10:1) as eluent to afford corresponding products. The KIE value was determined using <sup>1</sup>H NMR.

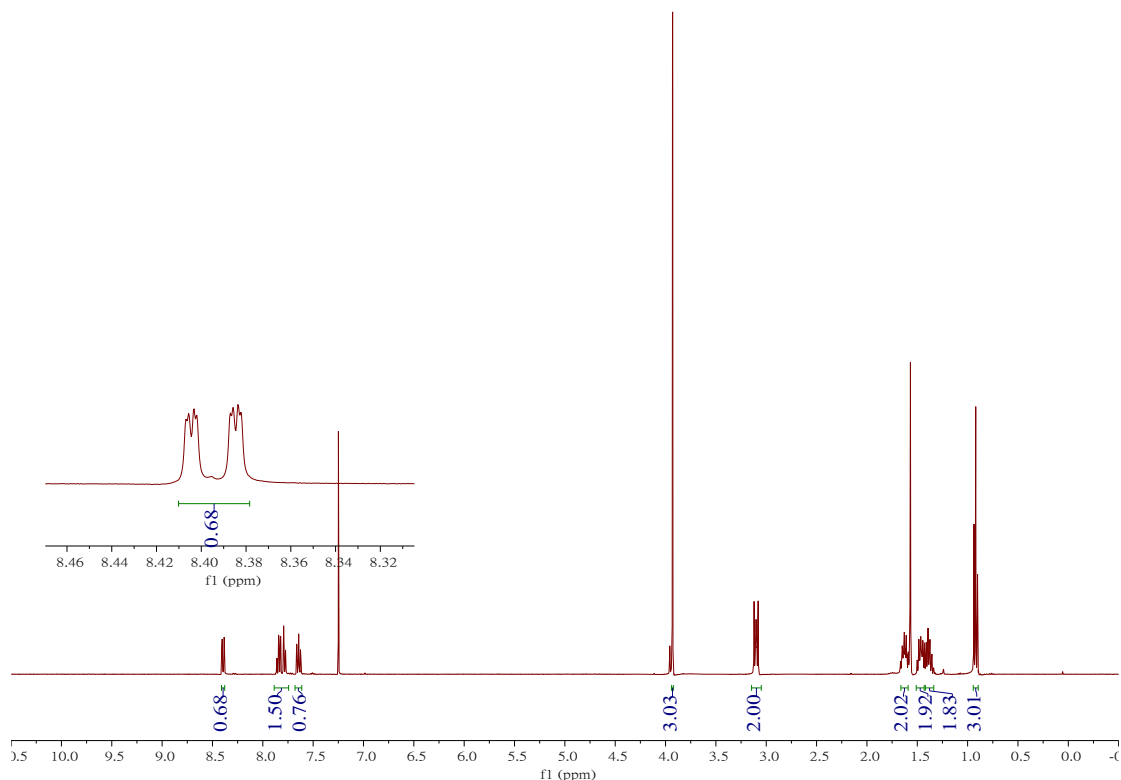

### (3) Parallel KIE study

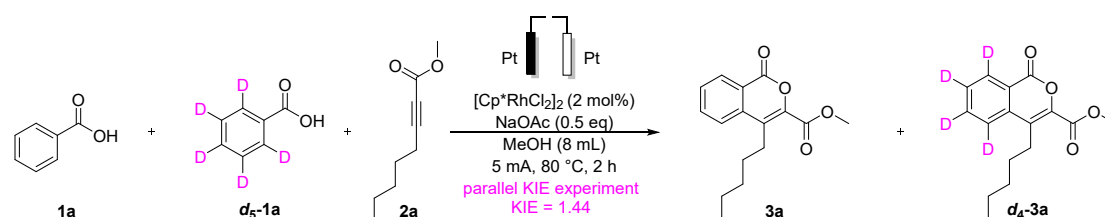

Two separated oven-dried 25 mL round bottom containing **1a** (100 mg, 0.82 mmol) or **1a-d<sub>5</sub>** (101 mg, 0.82 mmol), methyl oct-2-ynoate **2a** (151 mg, 0.98 mmol), [Cp\*RhCl<sub>2</sub>]<sub>2</sub> (10 mg, 2.0 mol%) and NaOAc (33.6 mg, 0.41 mmol) were dissolved in MeOH (8.0 mL). The resulting solution was stirred at 80 °C for 2 h in an undivided cell with a Pt electrode (1.0 × 1.5 cm<sup>2</sup>) and a Pt wire by applying 5.0 mA constant current. Then the two separated reaction mixture was transferred to 25-mL round bottom flask. The solvent was then removed under reduced pressure and purification was performed by flash column chromatography on silica gel with hexane/ethyl acetate (10:1) as eluent to afford corresponding products. The KIE value was determined using <sup>1</sup>H NMR.



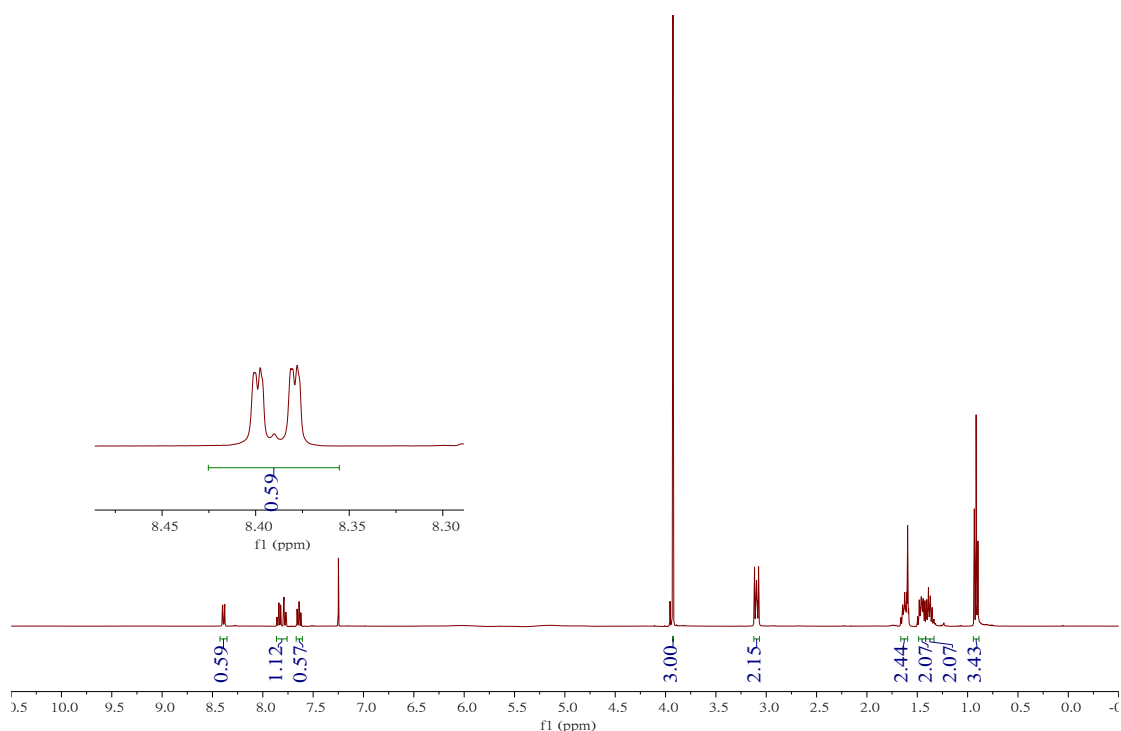

#### (4) Intermolecular competition experiments

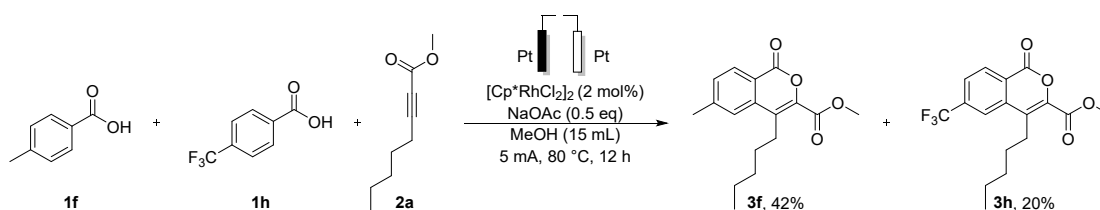

To an oven-dried 25 mL round bottom equipped with magnetic stir bar, **1f** (112 mg, 0.82 mmol) and **1h** (155 mg, 0.82 mmol), methyl oct-2-ynoate **2a** (303 mg, 1.97 mmol),  $[\text{Cp}^*\text{RhCl}_2]_2$  (20 mg, 2.0 mol%) and NaOAc (67.0 mg, 0.82 mmol) were dissolved in MeOH (15.0 mL). The resulting solution was stirred at 80 °C for 12 h in an undivided cell with a Pt electrode ( $1.0 \times 1.5 \text{ cm}^2$ ) and a Pt wire by applying 5.0 mA constant current. The solvent was then removed under reduced pressure and purification was performed by flash column chromatography on silica gel with hexane/ethyl acetate (10:1) as eluent to afford the **3f** and **3h** in 42% and 20% yields respectively.

#### (5) Intermolecular competition experiments

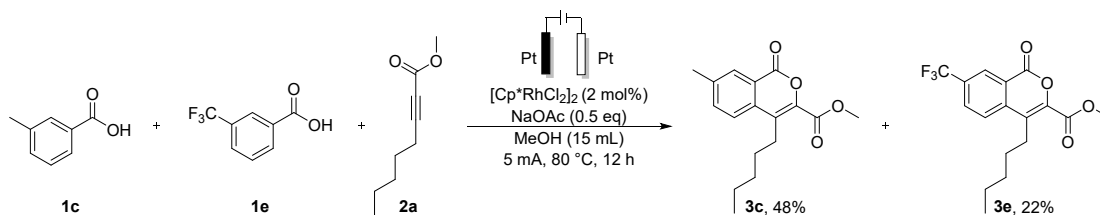

To an oven-dried 25 mL round bottom equipped with magnetic stir bar, **1c** (112 mg, 0.82 mmol) and **1e** (155 mg, 0.82 mmol), methyl oct-2-ynoate **2a** (303 mg, 1.97 mmol),  $[\text{Cp}^*\text{RhCl}_2]_2$  (20 mg, 2.0 mol%) and NaOAc (67.0 mg, 0.82 mmol) were dissolved in MeOH (15.0 mL). The resulting solution was stirred at 80 °C for 12 h in an undivided cell with a Pt electrode ( $1.0 \times 1.5 \text{ cm}^2$ ) and a Pt wire by applying 5.0 mA constant current. The solvent was then removed under reduced pressure and purification was performed by flash column chromatography on silica gel with hexane/ethyl acetate (10:1) as eluent to afford the **3c** and **3e** in 48% and 22% yields respectively.

## 9. Characterization Data of 3a-4j

### methyl 1-oxo-4-pentyl-1H-isochromene-3-carboxylate (**3a**)

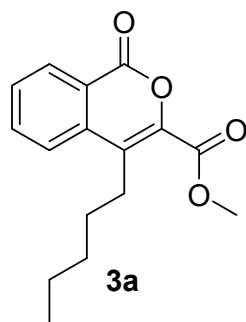

Flash chromatography for purification: hexane/ethyl acetate = 10:1. Yellow solid; Yield = 373 mg (83%);  $^1\text{H}$  NMR (400 MHz,  $\text{CDCl}_3$ )  $\delta$  8.42 - 8.34 (m, 1H), 7.88 - 7.75 (m, 2H), 7.69 - 7.58 (m, 1H), 3.92 (s, 3H), 3.08 (d,  $J = 8.2 \text{ Hz}$ , 2H), 1.67 - 1.57 (m, 2H), 1.51 - 1.33 (m, 4H), 0.91 (t,  $J = 7.2 \text{ Hz}$ , 3H);  $^{13}\text{C}$  { $^1\text{H}$ } NMR (101 MHz,  $\text{CDCl}_3$ )  $\delta$  161.7, 160.6, 139.6, 136.6, 135.1, 130.3, 130.3, 125.3, 124.9, 123.1, 52.8, 32.2, 29.8, 25.9, 22.6, 14.2; HRMS (ESI)  $m/z$ :  $[\text{M}+\text{H}]^+$  Calcd for  $\text{C}_{16}\text{H}_{19}\text{O}_4$  275.1278, found 275.1280.

### methyl 8-methyl-1-oxo-4-pentyl-1H-isochromene-3-carboxylate (**3b**)

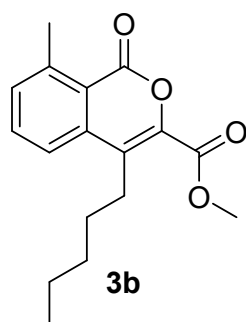

Flash chromatography for purification: hexane/ethyl acetate = 10:1. Yellow solid; Yield = 85 mg (18%);  $^1\text{H}$  NMR (400 MHz,

CDCl<sub>3</sub>) δ 8.21 - 8.18 (m, 1H), 7.70 - 7.61 (m, 2H), 3.92 (s, 3H), 3.13 - 3.05 (m, 2H), 2.49 (s, 3H), 1.64 - 1.56 (m, 2H), 1.49 - 1.42 (m, 2H), 1.40 - 1.34 (m, 2H), 0.91 (t, *J* = 7.2 Hz, 3H); <sup>13</sup>C{<sup>1</sup>H} NMR (101 MHz, CDCl<sub>3</sub>) δ 167.1, 160.8, 159.9, 143.9, 136.2, 134.4, 131.3, 122.1, 118.2, 110.6, 52.6, 32.6, 31.5, 27.4, 23.7, 22.5, 14.1; HRMS (ESI) *m/z*: [M+H]<sup>+</sup> Calcd for C<sub>17</sub>H<sub>21</sub>O<sub>4</sub> 389.1434, found 389.1436.

**methyl 7-methyl-1-oxo-4-pentyl-1H-isochromene-3-carboxylate (3c)**

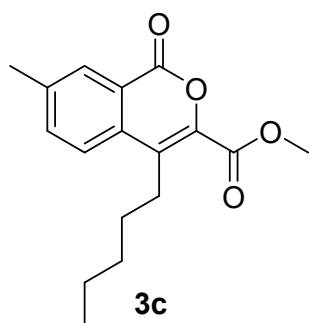

Flash chromatography for purification: hexane/ethyl acetate = 10:1. Yellow solid; Yield = 345 mg (73%); <sup>1</sup>H NMR (400 MHz, CDCl<sub>3</sub>) δ 7.54 (t, *J* = 7.8 Hz, 1H), 7.39 (d, *J* = 8.1 Hz, 1H), 7.28 (d, *J* = 7.4 Hz, 1H), 3.94 (s, 3H), 2.80 (s, 3H), 2.63 - 2.56 (m, 2H), 1.78 - 1.67 (m, 2H), 1.34 (dt, *J* = 7.2, 3.7 Hz,

4H), 0.89 (t, *J* = 5.8 Hz, 3H); <sup>13</sup>C{<sup>1</sup>H} NMR (101 MHz, CDCl<sub>3</sub>) δ 161.6, 160.7, 140.9, 138.7, 136.2, 134.0, 130.0, 125.6, 124.7, 122.8, 52.6, 32.0, 29.7, 25.8, 22.5, 21.4, 14.0; HRMS (ESI) *m/z*: [M+H]<sup>+</sup> Calcd for C<sub>17</sub>H<sub>21</sub>O<sub>4</sub> 389.1434, found 389.1434.

**methyl 7-methoxy-1-oxo-4-pentyl-1H-isochromene-3-carboxylate (3d)**

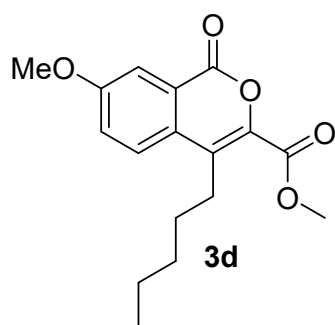

Flash chromatography for purification: hexane/ethyl acetate = 10:1. Yellow solid; Yield = 394 mg (79%); <sup>1</sup>H NMR (400 MHz, CDCl<sub>3</sub>) δ 7.79 (d, *J* = 2.8 Hz, 1H), 7.71 (d, *J* = 9.0 Hz, 1H), 7.39 (dd, *J* = 8.9, 2.8 Hz, 1H), 3.92 (s, 3H), 3.91 (s, 3H), 3.14 - 3.05 (m, 2H), 1.64 - 1.61 (m, 2H),

1.50 - 1.34 (m, 4H), 0.91 (t, *J* = 7.1 Hz, 3H); <sup>13</sup>C{<sup>1</sup>H} NMR (101 MHz, CDCl<sub>3</sub>) δ 161.7, 161.1, 160.8, 137.8, 130.0, 126.7, 126.0, 124.7, 124.5, 110.9, 56.1, 52.7, 32.2, 29.9, 26.0, 22.6, 14.2; HRMS (ESI) *m/z*: [M+H]<sup>+</sup> Calcd for C<sub>17</sub>H<sub>21</sub>O<sub>5</sub> 305.1384, found 305.1387.

**methyl 1-oxo-4-pentyl-7-(trifluoromethyl)-1H-isochromene-3-carboxylate (3e)**

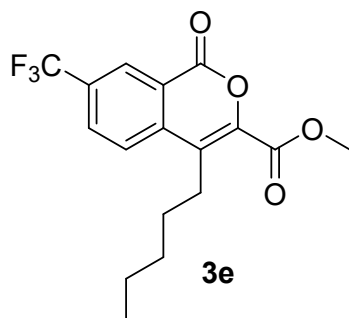

Flash chromatography for purification: hexane/ethyl acetate = 10:1. Yellow solid; Yield = 370 mg (66%);  $^1\text{H}$  NMR (400 MHz,  $\text{CDCl}_3$ )  $\delta$  8.66 (d,  $J = 1.9$  Hz, 1H), 8.07 - 8.02 (m, 1H), 7.90 (d,  $J = 8.5$  Hz, 1H), 3.95 (s, 3H), 3.15 - 3.07 (m, 2H), 1.66 - 1.58 (m, 2H), 1.51 - 1.43 (m, 2H),

1.42 - 1.34 (m, 2H), 0.92 (t,  $J = 7.2$  Hz, 3H);  $^{13}\text{C}$  {1 H} NMR (101 MHz,  $\text{CDCl}_3$ )  $\delta$  161.2, 159.5, 141.1, 139.5, 132.7, 132.3, 132.0, 131.4, 131.3, 131.3, 131.3, 127.8, 127.7, 127.7, 127.6, 125.8, 124.5, 123.9, 123.3, 121.8, 53.0, 32.0, 29.6, 25.9, 22.5, 14.1; HRMS (ESI)  $m/z$ :  $[\text{M}+\text{H}]^+$  Calcd for  $\text{C}_{17}\text{H}_{18}\text{F}_3\text{O}_4$  343.1156, found 343.1152.

#### methyl 6-methyl-1-oxo-4-pentyl-1H-isochromene-3-carboxylate (3f)

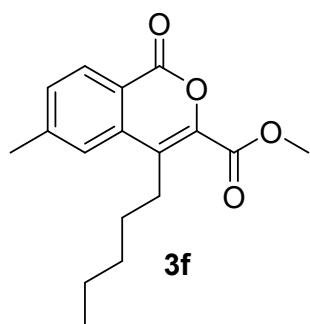

Flash chromatography for purification: hexane/ethyl acetate = 10:1. Yellow solid; Yield = 350 mg (74%);  $^1\text{H}$  NMR (400 MHz,  $\text{CDCl}_3$ )  $\delta$  8.27 (d,  $J = 8.1$  Hz, 1H), 7.53 (s, 1H), 7.45 (d,  $J = 8.1$  Hz, 1H), 3.92 (s, 3H), 3.12 - 3.04 (m, 2H), 2.54 (s, 3H), 1.66 - 1.56 (m, 2H), 1.51 - 1.34 (m, 4H), 0.92 (t,  $J =$

7.1 Hz, 3H);  $^{13}\text{C}$  {1 H} NMR (101 MHz,  $\text{CDCl}_3$ )  $\delta$  161.7, 160.7, 146.2, 139.6, 136.6, 131.5, 130.3, 125.2, 124.8, 120.6, 52.7, 32.1, 29.7, 25.7, 22.5, 22.5, 14.1; HRMS (ESI)  $m/z$ :  $[\text{M}+\text{H}]^+$  Calcd for  $\text{C}_{17}\text{H}_{21}\text{O}_4$  289.1434., found 289.1436.

#### methyl 6-methoxy-1-oxo-4-pentyl-1H-isochromene-3-carboxylate (3g)

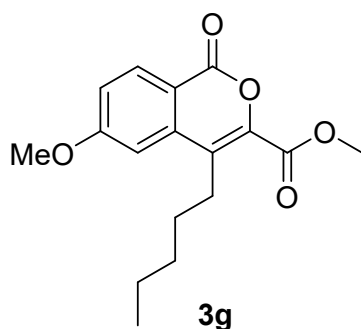

Flash chromatography for purification: hexane/ethyl acetate = 10:1. Yellow solid; Yield = 384 mg (77%);  $^1\text{H}$  NMR (400 MHz,  $\text{CDCl}_3$ )  $\delta$  8.33 (d,  $J = 8.5$  Hz, 1H), 7.18 - 7.13 (m, 2H), 3.95 (s, 3H), 3.92 (s, 3H), 3.08 - 3.00 (m, 2H), 1.67 - 1.59 (m, 2H), 1.49 - 1.42 (m, 2H), 1.41 - 1.35

(m, 2H), 0.92 (t,  $J = 7.1$  Hz, 3H);  $^{13}\text{C}$  {1 H} NMR (101 MHz,  $\text{CDCl}_3$ )  $\delta$  165.0, 161.8,

140.2, 138.9, 132.7, 124.9, 117.0, 116.1, 116.1, 108.6, 55.9, 52.8, 32.2, 29.5, 26.0, 22.6, 14.2; HRMS (ESI) m/z:  $[M+H]^+$  Calcd for  $C_{17}H_{21}O_5$  305.1384, found 305.1382.

**methyl 1-oxo-4-pentyl-6-(trifluoromethyl)-1H-isochromene-3-carboxylate (3h)**

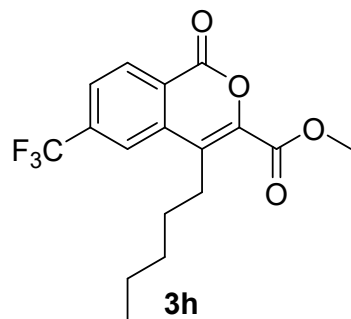

Flash chromatography for purification: hexane/ethyl acetate = 10:1. Yellow solid; Yield = 393 mg (70%);  $^1H$  NMR (400 MHz,  $CDCl_3$ )  $\delta$  8.51 (d,  $J$  = 8.2 Hz, 1H), 8.00 (s, 1H), 7.89 - 7.85 (m, 1H), 3.95 (s, 3H), 3.15 - 3.07 (m, 2H), 1.68 - 1.58 (m, 2H), 1.51 - 1.35 (m, 4H), 0.93 (t,  $J$  =

7.1 Hz, 3H);  $^{13}C$  {1 H} NMR (101 MHz,  $CDCl_3$ )  $\delta$  161.3, 159.5, 140.8, 137.3, 136.9, 136.6, 131.4, 126.6, 126.5, 125.5, 124.7, 124.3, 122.1, 122.0, 122.0, 122.0, 53.0, 32.0, 29.6, 25.8, 22.4, 14.1; HRMS (ESI) m/z:  $[M+H]^+$  Calcd for  $C_{17}H_{18}F_3O_4$  343.1156, found 343.1157.

**methyl 6,8-dimethyl-1-oxo-4-pentyl-1H-isochromene-3-carboxylate (3i)**

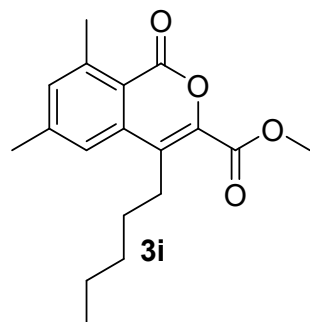

Flash chromatography for purification: hexane/ethyl acetate = 10:1. Yellow solid; Yield = 59 mg (12%);  $^1H$  NMR (400 MHz,  $CDCl_3$ )  $\delta$  7.15 (s, 1H), 7.10 (s, 1H), 3.94 (s, 3H), 2.75 (s, 3H), 2.59 - 2.54 (m, 2H), 2.39 (s, 3H), 1.77 - 1.67 (m, 2H), 1.32 (m, 4H), 0.89 (t,  $J$  = 7.1 Hz, 3H);  $^{13}C$  {1 H} NMR (101

MHz,  $CDCl_3$ )  $\delta$  161.8, 159.9, 145.0, 144.2, 139.5, 138.1, 134.5, 125.0, 123.1, 119.0, 52.7, 32.1, 29.6, 26.0, 23.6, 22.6, 22.2, 14.2; HRMS (ESI) m/z:  $[M+H]^+$  Calcd for  $C_{18}H_{23}O_4$  303.1591, found 303.1583.

**methyl 1-oxo-4-pentyl-1H-benzo[h]isochromene-3-carboxylate (3j)**

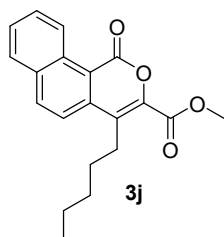

Flash chromatography for purification: hexane/ethyl acetate = 10:1.

Yellow solid; Yield = 393 mg (74%);  $^1H$  NMR (400 MHz,  $CDCl_3$ )  $\delta$  9.83 (d,  $J$  = 8.6 Hz, 1H), 8.25 (d,  $J$  = 8.9 Hz, 1H), 7.95 (d,  $J$  = 8.0

Hz, 1H), 7.83 (d,  $J = 8.9$  Hz, 1H), 7.79 (ddd,  $J = 8.6, 6.9, 1.4$  Hz, 1H), 7.72 - 7.67 (m, 1H), 3.97 (s, 3H), 3.24 - 3.17 (m, 2H), 1.72 - 1.62 (m, 2H), 1.53 - 1.45 (m, 2H), 1.44 - 1.36 (m, 2H), 0.93 (t,  $J = 7.2$  Hz, 3H);  $^{13}\text{C}\{1\text{H}\}$  NMR (101 MHz,  $\text{CDCl}_3$ )  $\delta$  161.6, 159.7, 140.6, 138.9, 136.6, 133.6, 131.7, 129.8, 128.6, 128.2, 127.5, 125.0, 121.0, 117.8, 52.9, 32.1, 29.9, 26.2, 22.6, 14.2; HRMS (ESI)  $m/z$ :  $[\text{M}+\text{H}]^+$  Calcd for  $\text{C}_{20}\text{H}_{21}\text{O}_4$  325.1434, found 325.1439.

**methyl 7-oxo-4-pentyl-7H-thieno[2,3-c]pyran-5-carboxylate (3k)**

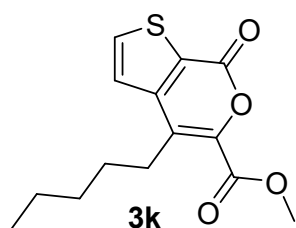

Flash chromatography for purification: hexane/ethyl acetate = 10:1. Yellow solid; Yield = 326 mg (71%);  $^1\text{H}$  NMR (400 MHz,  $\text{CDCl}_3$ )  $\delta$  7.90 (d,  $J = 5.2$  Hz, 1H), 7.38 (d,  $J = 5.2$  Hz, 1H), 3.92 (s, 3H), 3.10 - 3.02 (m, 2H), 1.63 (d,  $J = 3.9$  Hz,

2H), 1.45 - 1.32 (m, 4H), 0.90 (t,  $J = 7.1$  Hz, 3H);  $^{13}\text{C}\{1\text{H}\}$  NMR (101 MHz,  $\text{CDCl}_3$ )  $\delta$  161.2, 156.3, 147.9, 141.0, 136.8, 127.6, 124.7, 124.3, 52.6, 31.9, 29.7, 27.9, 22.4, 14.0.; HRMS (ESI)  $m/z$ :  $[\text{M}+\text{H}]^+$  Calcd for  $\text{C}_{14}\text{H}_{17}\text{O}_4\text{S}$  281.0842, found 281.0847.

**ethyl 4-methyl-1-oxo-1H-isochromene-3-carboxylate (3m)**

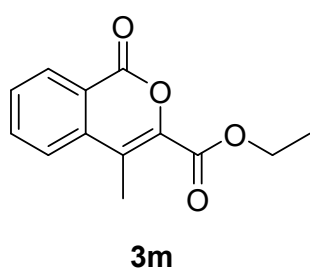

Flash chromatography for purification: hexane/ethyl acetate = 10:1. Yellow solid; Yield = 289 mg (76%);  $^1\text{H}$  NMR (400 MHz,  $\text{CDCl}_3$ )  $\delta$  8.38 (dd,  $J = 7.9, 1.0$  Hz, 1H), 7.87 - 7.76 (m, 2H), 7.67 - 7.61 (m, 1H), 4.39 (q,  $J = 7.1$  Hz, 2H), 2.63 (s, 3H), 1.41 (t,  $J = 7.1$  Hz, 3H);  $^{13}\text{C}\{1\text{H}\}$  NMR (101 MHz,

$\text{CDCl}_3$ )  $\delta$  161.4, 160.6, 140.0, 137.3, 135.0, 130.1, 129.9, 124.7, 122.5, 119.9, 62.0, 14.2, 12.1; HRMS (ESI)  $m/z$ :  $[\text{M}+\text{H}]^+$  Calcd for  $\text{C}_{13}\text{H}_{13}\text{O}_4$  233.0808, found 233.0807.

**ethyl 1-oxo-4-phenyl-1H-isochromene-3-carboxylate (3n)**

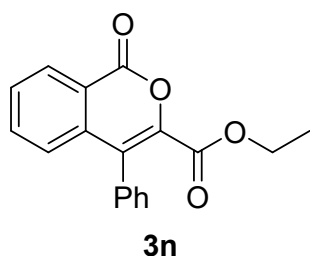

Flash chromatography for purification: hexane/ethyl acetate = 10:1. Yellow solid; Yield = 381 mg (79%);  $^1\text{H}$  NMR (400

MHz, CDCl<sub>3</sub>)  $\delta$  8.37 (ddd,  $J = 7.9, 1.3, 0.6$  Hz, 1H), 7.83 - 7.73 (m, 2H), 7.67 - 7.62 (m, 2H), 7.58 (ddd,  $J = 8.1, 7.0, 1.4$  Hz, 1H), 7.49 - 7.44 (m, 3H), 4.20 (q,  $J = 7.2$  Hz, 2H), 1.05 (t,  $J = 7.2$  Hz, 3H); <sup>13</sup>C{<sup>1</sup>H} NMR (101 MHz, CDCl<sub>3</sub>)  $\delta$  166.4, 161.2, 155.5, 135.4, 134.8, 132.7, 130.6, 130.0, 128.9, 128.6, 128.3, 124.2, 119.9, 111.0, 62.0, 13.7; HRMS (ESI)  $m/z$ : [M+H]<sup>+</sup> Calcd for C<sub>18</sub>H<sub>15</sub>O<sub>4</sub> 295.0965, found 295.0972.

#### N,4-dimethyl-1-oxo-1H-isochromene-3-carboxamide (3o)

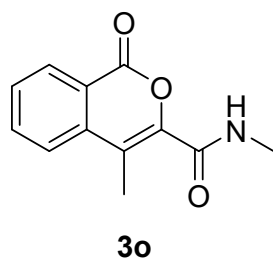

Flash chromatography for purification: hexane/ethyl acetate = 10:1. Yellow solid; Yield = 310 mg (87%); <sup>1</sup>H NMR (400 MHz, CDCl<sub>3</sub>)  $\delta$  8.36 (d,  $J = 8.0$  Hz, 1H), 7.90 - 7.78 (m, 2H), 7.64 (t,  $J = 7.4$  Hz, 1H), 7.11 (s, 1H), 2.98 (d,  $J = 4.9$  Hz, 3H), 2.78 (s, 3H); <sup>13</sup>C{<sup>1</sup>H} NMR (101 MHz, CDCl<sub>3</sub>)  $\delta$  160.5, 138.2, 135.3, 129.9, 129.8, 124.8, 122.1, 122.0, 118.2, 26.3, 11.7; HRMS (ESI)  $m/z$ : [M+H]<sup>+</sup> Calcd for C<sub>12</sub>H<sub>12</sub>NO<sub>3</sub> 218.0812, found 218.0811.

#### 4-methyl-N-octyl-1-oxo-1H-isochromene-3-carboxamide (3p)

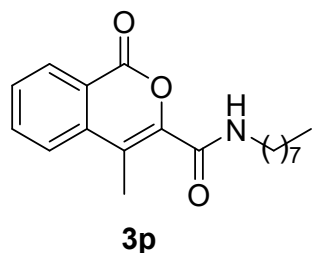

Flash chromatography for purification: hexane/ethyl acetate = 10:1. Yellow solid; Yield = 434 mg (84%); <sup>1</sup>H NMR (400 MHz, CDCl<sub>3</sub>)  $\delta$  8.36 (d,  $J = 6.6$  Hz, 1H), 7.88 - 7.79 (m, 2H), 7.66 - 7.59 (m, 1H), 7.08 (s, 1H), 3.44 - 3.36 (m, 2H), 2.78 (s, 3H), 1.40 - 1.22 (m, 12H), 0.94 - 0.84 (t,  $J = 7.2$  Hz, 3H); <sup>13</sup>C{<sup>1</sup>H} NMR (101 MHz, CDCl<sub>3</sub>)  $\delta$  161.0, 160.6, 141.2, 138.3, 135.3, 129.9, 129.7, 124.8, 122.0, 118.2, 39.7, 31.9, 29.5, 29.3, 29.3, 27.1, 22.7, 14.2, 11.7; HRMS (ESI)  $m/z$ : [M+H]<sup>+</sup> Calcd for C<sub>19</sub>H<sub>16</sub>NO<sub>3</sub> 316.1907, found 316.1906.

#### N-benzyl-4-methyl-1-oxo-1H-isochromene-3-carboxamide (3q)

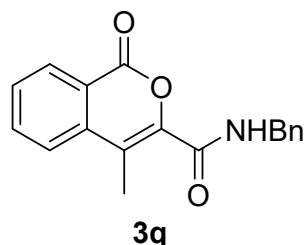

Flash chromatography for purification: hexane/ethyl acetate = 10:1. Yellow solid; Yield = 413 mg (86%); <sup>1</sup>H NMR (400

MHz, CDCl<sub>3</sub>) δ 8.35 (d, *J* = 9.7 Hz, 1H), 7.90 - 7.78 (m, 2H), 7.67 - 7.60 (m, 1H), 7.41 (s, 1H), 7.37 - 7.33 (m, 4H), 7.31 - 7.27 (m, 1H), 4.60 (d, *J* = 5.9 Hz, 2H), 2.81 (s, 3H); <sup>13</sup>C{<sup>1</sup>H} NMR (101 MHz, CDCl<sub>3</sub>) δ 160.9, 160.3, 140.9, 138.0, 137.5, 135.2, 129.9, 129.8, 128.8, 128.0, 127.7, 124.7, 122.0, 118.7, 43.6, 11.6; HRMS (ESI) *m/z*: [M+H]<sup>+</sup> Calcd for C<sub>18</sub>H<sub>16</sub>NO<sub>3</sub> 294.1125, found 294.1119.

### N-methyl-1-oxo-4-pentyl-1H-isochromene-3-carboxamide (3r)

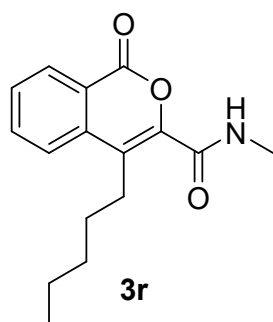

Flash chromatography for purification: hexane/ethyl acetate = 10:1. Yellow solid; Yield = 323 mg (72%); <sup>1</sup>H NMR (400 MHz, CDCl<sub>3</sub>) δ 8.36 (d, *J* = 8.0 Hz, 1H), 7.88 - 7.77 (m, 2H), 7.65 - 7.57 (m, 1H), 3.31 - 3.24 (m, 2H), 2.96 (d, *J* = 5.0 Hz, 3H), 1.62 (q, *J* = 8.1, 7.6 Hz, 2H), 1.53 - 1.43 (m, 2H), 1.42 - 1.33 (m, 2H), 0.96 - 0.88 (m, 3H); <sup>13</sup>C{<sup>1</sup>H} NMR (101 MHz, CDCl<sub>3</sub>) δ

161.4, 160.5, 141.0, 137.4, 135.2, 130.1, 129.7, 124.8, 123.0, 122.4, 32.3, 29.9, 26.2, 25.2, 22.7, 14.2; HRMS (ESI) *m/z*: [M+H]<sup>+</sup> Calcd for C<sub>16</sub>H<sub>20</sub>NO<sub>3</sub> 274.1438, found 274.1438.

### N-cyclopentyl-1-oxo-4-pentyl-1H-isochromene-3-carboxamide (3s)

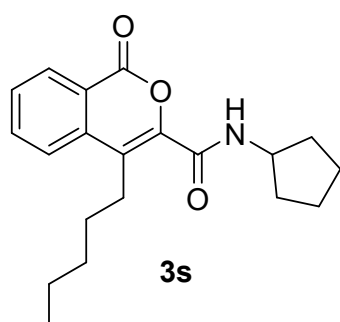

Flash chromatography for purification: hexane/ethyl acetate = 10:1. Yellow solid; Yield = 424 mg (79%); <sup>1</sup>H NMR (400 MHz, CDCl<sub>3</sub>) δ 8.32 (d, *J* = 9.1 Hz, 1H), 7.84 - 7.72 (m, 2H), 7.58 (t, *J* = 8.1 Hz, 1H), 6.98 (d, *J* = 7.4 Hz, 1H), 4.38 - 4.24 (m, 1H), 3.27 - 3.18 (m, 2H), 2.11 - 1.99 (m, 2H), 1.79 - 1.68 (m, 2H), 1.67 - 1.55 (m, 4H),

1.55 - 1.40 (m, 4H), 1.40 - 1.31 (m, 2H), 0.88 (t, *J* = 7.2 Hz, 3H); <sup>13</sup>C{<sup>1</sup>H} NMR (101 MHz, CDCl<sub>3</sub>) δ 160.6, 160.3, 141.2, 137.5, 135.2, 130.1, 129.6, 124.8, 122.8, 122.4, 51.4, 33.1, 32.3, 29.9, 25.3, 24.0, 22.7, 14.2; HRMS (ESI) *m/z*: [M+H]<sup>+</sup> Calcd for



C<sub>20</sub>H<sub>26</sub>O<sub>3</sub> 328.1907, found 328.1906.

**N-(furan-2-ylmethyl)-1-oxo-4-pentyl-1H-isochromene-3-carboxamide (3t)**

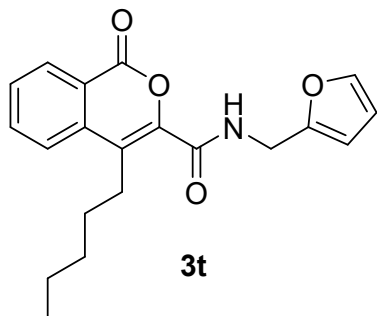

Flash chromatography for purification: hexane/ethyl acetate = 10:1. Yellow solid; Yield = 423 mg (76%); <sup>1</sup>H NMR (400 MHz, CDCl<sub>3</sub>) δ 8.35 (d, *J* = 9.1 Hz, 1H), 7.87 - 7.76 (m, 2H), 7.61 (t, *J* = 8.1 Hz, 1H), 7.38 (d, *J* = 0.7 Hz, 1H), 7.35 (s, 1H), 6.35 - 6.23 (m, 2H), 4.58 (d, *J* = 5.6 Hz, 2H), 3.33 - 3.23 (m, 2H), 1.70 - 1.59 (m,

2H), 1.53 - 1.43 (m, 2H), 1.41 - 1.34 (m, 2H), 0.91 (t, *J* = 7.2 Hz, 3H); <sup>13</sup>C{<sup>1</sup>H} NMR (101 MHz, CDCl<sub>3</sub>) δ 165.2, 161.8, 156.7, 150.5, 142.6, 135.3, 135.1, 129.8, 128.4, 123.6, 119.8, 113.6, 110.7, 108.2, 36.9, 32.0, 31.4, 27.4, 22.4, 14.0; HRMS (ESI) *m/z*: [M+H]<sup>+</sup> Calcd for C<sub>12</sub>H<sub>12</sub>NO<sub>3</sub> 340.1543, found 340.1544.

**methyl 2-(3-oxo-1-pentyl-1,3-dihydroisobenzofuran-1-yl)acetate (4a)**

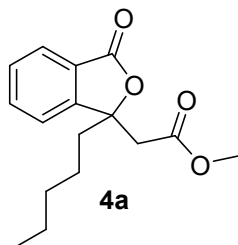

Flash chromatography for purification: hexane/ethyl acetate = 8:1.

Yellow solid; Yield = 317 mg (70%); <sup>1</sup>H NMR (400 MHz, CDCl<sub>3</sub>) δ 7.85 (d, *J* = 7.6 Hz, 1H), 7.64 (t, *J* = 7.5 Hz, 1H), 7.50 (t, *J* = 7.5 Hz, 1H), 7.44 (d, *J* = 7.7 Hz, 1H), 3.52 (s, 3H), 2.98 (s, 2H), 2.20

- 2.07 (m, 1H), 2.00 - 1.89 (m, 1H), 1.28 - 1.23 (m, 1H), 1.22 - 1.12 (m, 4H), 0.96 - 0.85 (m, 1H), 0.78 (t, *J* = 6.8 Hz, 3H); <sup>13</sup>C{<sup>1</sup>H} NMR (101 MHz, CDCl<sub>3</sub>) δ 169.8, 169.0, 151.8, 139.4, 133.7, 130.9, 124.0, 118.8, 85.2, 51.6, 42.8, 38.5, 31.5, 22.6, 22.2, 17.3, 13.8; HRMS (ESI) *m/z*: [M+H]<sup>+</sup> Calcd for C<sub>16</sub>H<sub>21</sub>O<sub>4</sub> 277.1434; Found 277.1435.

**methyl 2-(4-methyl-3-oxo-1-pentyl-1,3-dihydroisobenzofuran-1-yl)acetate (4b)**

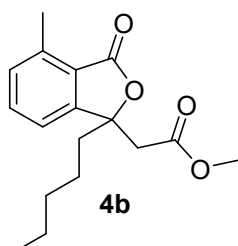

Flash chromatography for purification: hexane/ethyl acetate = 8:1.

Yellow solid; Yield = 362 mg (76%); <sup>1</sup>H NMR (400 MHz, CDCl<sub>3</sub>) δ 7.46 (td, *J* = 7.6, 1.2 Hz, 1H), 7.21 (t, *J* = 7.2 Hz, 2H), 3.50 (s,

3H), 2.92 (s, 2H), 2.64 (s, 3H), 2.17 - 2.03 (m, 1H), 1.95 - 1.84 (m, 1H), 1.28 - 1.11 (m, 5H), 0.97 - 0.84 (m, 1H), 0.79 - 0.70 (m, 3H);  $^{13}\text{C}\{1\text{H}\}$  NMR (101 MHz,  $\text{CDCl}_3$ )  $\delta$  169.6, 169.0, 151.2, 134.0, 129.2, 126.6, 125.5, 121.5, 86.5, 51.7, 42.7, 38.4, 31.4, 22.6, 22.2, 13.8; HRMS (ESI)  $m/z$ :  $[\text{M}+\text{H}]^+$  Calcd for  $\text{C}_{17}\text{H}_{23}\text{O}_4$  291.1591; Found 291.1592.

**methyl 2-(4,6-dimethyl-3-oxo-1-pentyl-1,3-dihydroisobenzofuran-1-yl)acetate (4c)**

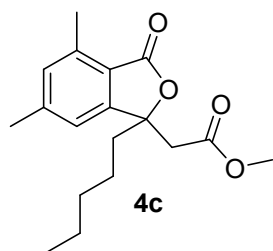

Flash chromatography for purification: hexane/ethyl acetate = 8:1. Yellow solid; Yield = 369 mg (74%);  $^1\text{H}$  NMR (400 MHz,  $\text{CDCl}_3$ )  $\delta$  7.04 (s, 1H), 6.98 (s, 1H), 3.54 (s, 3H), 2.91 (s, 2H), 2.61 (s, 3H), 2.40 (s, 3H), 2.17 - 2.02 (m, 1H), 1.86 (d,  $J$  = 18.6

Hz, 1H), 1.30 - 1.14 (m, 3H), 0.99 - 0.86 (m, 1H), 0.79 (t,  $J$  = 6.6 Hz, 3H);  $^{13}\text{C}\{1\text{H}\}$  NMR (101 MHz,  $\text{CDCl}_3$ )  $\delta$  170.1, 169.3, 152.5, 145.0, 139.3, 132.2, 121.8, 119.4, 85.1, 52.0, 43.3, 38.7, 31.7, 22.8, 22.5, 22.1, 17.5, 14.1; HRMS (ESI)  $m/z$ :  $[\text{M}+\text{H}]^+$  Calcd for  $\text{C}_{18}\text{H}_{25}\text{O}_4$  305.1747; Found 305.1747.

**methyl 2-(1-oxo-3-pentyl-1,3-dihydronaphtho[1,2-c]furan-3-yl)acetate (4d)**

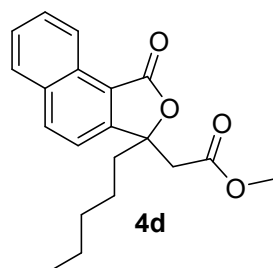

Flash chromatography for purification: hexane/ethyl acetate = 8:1. Yellow solid; Yield = 423 mg (79%);  $^1\text{H}$  NMR (400 MHz,  $\text{CDCl}_3$ )  $\delta$  9.01 (d,  $J$  = 8.3 Hz, 1H), 8.13 (d,  $J$  = 8.4 Hz, 1H), 7.96 (d,  $J$  = 8.2 Hz, 1H), 7.72 (t,  $J$  = 7.6 Hz, 1H), 7.62 (t,  $J$  = 7.6 Hz,

1H), 7.51 (d,  $J$  = 8.4 Hz, 1H), 3.54 (s, 3H), 3.05 (s, 2H), 2.32 - 2.16 (m, 1H), 2.09 - 1.98 (m, 1H), 1.36 - 1.13 (m, 5H), 0.98 - 0.85 (m, 1H), 0.79 (t,  $J$  = 7.0 Hz, 3H);  $^{13}\text{C}\{1\text{H}\}$  NMR (101 MHz,  $\text{CDCl}_3$ )  $\delta$  170.1, 169.2, 152.9, 135.7, 133.5, 129.2, 129.2, 128.5, 127.4, 123.8, 120.8, 118.4, 85.7, 52.0, 42.9, 38.1, 31.6, 22.8, 22.4, 14.0; HRMS (ESI)  $m/z$ :  $[\text{M}+\text{H}]^+$  Calcd for  $\text{C}_{20}\text{H}_{23}\text{O}_4$  327.1591; Found 327.1588.

**ethyl 2-(1-methyl-3-oxo-1,3-dihydroisobenzofuran-1-yl)acetate (4e)**

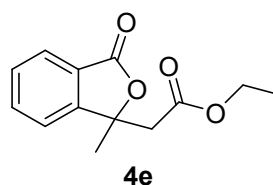

Flash chromatography for purification: hexane/ethyl acetate =

8:1. Yellow solid; Yield = 284 mg (74%);  $^1\text{H}$  NMR (400 MHz,  $\text{CDCl}_3$ )  $\delta$  7.86 (d,  $J$  = 7.6 Hz, 1H), 7.65 (t,  $J$  = 7.5 Hz, 1H), 7.54 - 7.46 (m, 2H), 4.00 (q,  $J$  = 7.1 Hz, 2H), 2.97 (s, 2H), 1.75 (s, 3H), 1.09 (t,  $J$  = 7.1 Hz, 3H);  $^{13}\text{C}$  {1 H} NMR (101 MHz,  $\text{CDCl}_3$ )  $\delta$  169.5, 168.6, 152.6, 134.2, 129.4, 126.1, 125.7, 121.5, 84.3, 60.9, 44.2, 26.4, 14.0; HRMS (ESI)  $m/z$ :  $[\text{M}+\text{H}]^+$  Calcd for  $\text{C}_{13}\text{H}_{15}\text{O}_4$  235.0965; Found 235.0963.

#### 2-(1-methyl-3-oxo-1,3-dihydroisobenzofuran-1-yl)-N-octylacetamide (4g)

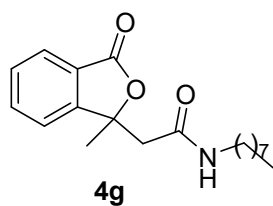

Flash chromatography for purification: hexane/ethyl acetate = 6:1. Yellow solid; Yield = 369 mg (71%);  $^1\text{H}$  NMR (400 MHz,  $\text{CDCl}_3$ )  $\delta$  8.23 - 8.17 (m, 1H), 7.69 (t,  $J$  = 7.7 Hz, 1H), 7.49 - 7.40 (m, 2H), 6.03 (s, 1H), 3.49 (q,  $J$  = 7.0 Hz, 2H), 2.33 (s, 3H), 1.68 - 1.61 (m, 2H), 1.45 - 1.19 (m, 12H), 0.87 (t,  $J$  = 6.8 Hz, 3H);  $^{13}\text{C}$  {1 H} NMR (101 MHz,  $\text{CDCl}_3$ )  $\delta$  165.4, 161.7, 152.7, 135.3, 129.8, 128.3, 123.5, 119.7, 114.3, 40.2, 31.8, 29.6, 29.3, 29.3, 27.1, 22.7, 18.2, 14.2; HRMS (ESI)  $m/z$ :  $[\text{M}+\text{H}]^+$  Calcd for  $\text{C}_{19}\text{H}_{28}\text{NO}_3$  318.2064; Found 318.2063.

#### N-benzyl-2-(1-methyl-3-oxo-1,3-dihydroisobenzofuran-1-yl)acetamide (4h)

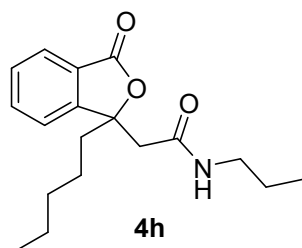

Flash chromatography for purification: hexane/ethyl acetate = 6:1. Yellow solid; Yield = 378 mg (76%);  $^1\text{H}$  NMR (400 MHz,  $\text{CDCl}_3$ )  $\delta$  8.25 (d,  $J$  = 7.9 Hz, 1H), 7.70 (t,  $J$  = 7.7 Hz, 1H), 7.52 - 7.42 (m, 2H), 5.91 (s, 1H), 3.46 (q,  $J$  = 6.7 Hz, 2H), 2.64 - 2.52 (m, 2H), 1.78 - 1.69 (m, 2H), 1.39 - 1.27 (m, 6H), 1.01 (t,  $J$  = 7.4 Hz, 3H), 0.89 (t,  $J$  = 7.0 Hz, 3H);  $^{13}\text{C}$  {1 H} NMR (101 MHz,  $\text{CDCl}_3$ )  $\delta$  165.4, 156.3, 135.3, 135.2, 129.9, 128.3, 123.6, 114.1, 100.0, 41.9, 32.1, 31.5, 27.4, 23.0, 22.4, 14.0, 11.6; HRMS (ESI)  $m/z$ :  $[\text{M}+\text{Na}]^+$  Calcd for  $\text{C}_{18}\text{H}_{17}\text{NNaO}_3$  318.1101; Found 318.1100.

#### N-cyclopentyl-2-(3-oxo-1-pentyl-1,3-dihydroisobenzofuran-1-yl)acetamide (4i)

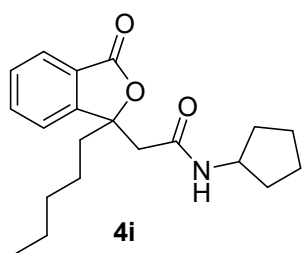

Flash chromatography for purification: hexane/ethyl acetate = 6:1. Yellow solid; Yield = 443 mg (82%);  $^1\text{H}$  NMR (400 MHz,  $\text{CDCl}_3$ )  $\delta$  8.18 (d,  $J = 9.4$  Hz, 1H), 7.68 (t,  $J = 8.3$  Hz, 1H), 7.47 - 7.38 (m, 2H), 6.02 (d,  $J = 7.5$  Hz, 1H), 4.46 (q,  $J = 6.6$  Hz, 1H), 2.62 - 2.54 (m, 2H), 2.17 - 2.06 (m, 2H), 1.82 - 1.60 (m, 8H), 1.59 - 1.45 (m, 2H), 1.39 - 1.27 (m, 4H), 0.90 - 0.87 (m, 3H);  $^{13}\text{C}$  {1 H} NMR (101 MHz,  $\text{CDCl}_3$ )  $\delta$  165.0, 162.0, 156.3, 135.3, 129.9, 128.4, 123.6, 119.9, 114.2, 52.0, 33.3, 33.3, 32.1, 31.6, 27.5, 23.9, 22.5, 14.1; HRMS (ESI)  $m/z$ :  $[\text{M}+\text{H}]^+$  Calcd for  $\text{C}_{20}\text{H}_{28}\text{NO}_3$  330.2064; Found 330.2062.

**N-(furan-2-ylmethyl)-2-(3-oxo-1-pentyl-1,3-dihydroisobenzofuran-1-yl)acetamide (4j)**

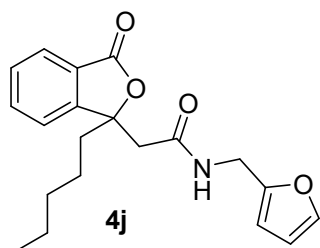

Flash chromatography for purification: hexane/ethyl acetate = 6:1. Yellow solid; Yield = 425 mg (76%);  $^1\text{H}$  NMR (400 MHz,  $\text{CDCl}_3$ )  $\delta$  8.24 (d,  $J = 8.8$  Hz, 1H), 7.69 (t,  $J = 8.4$  Hz, 1H), 7.46 (dd,  $J = 17.2, 9.1$  Hz, 2H), 7.38 (d,  $J = 2.5$  Hz, 1H), 6.39 - 6.31 (m, 1H), 6.19 (s, 1H), 4.67 (d,  $J = 5.7$  Hz, 2H), 2.59 - 2.50 (m, 2H), 1.75 - 1.64 (m, 2H), 1.32 - 1.26 (m, 4H), 0.91 - 0.81 (m, 3H);  $^{13}\text{C}$  {1 H} NMR (101 MHz,  $\text{CDCl}_3$ )  $\delta$  165.2, 161.8, 156.7, 150.5, 142.6, 135.3, 135.1, 129.8, 123.6, 119.8, 113.6, 110.7, 108.2, 36.9, 36.9, 32.0, 31.4, 27.4, 22.4, 14.0; HRMS (ESI)  $m/z$ :  $[\text{M}+\text{Na}]^+$  Calcd for  $\text{C}_{20}\text{H}_{23}\text{NNaO}_4$  364.1519; Found 364.1521.

**10. Spectral Data of 3a-4j**

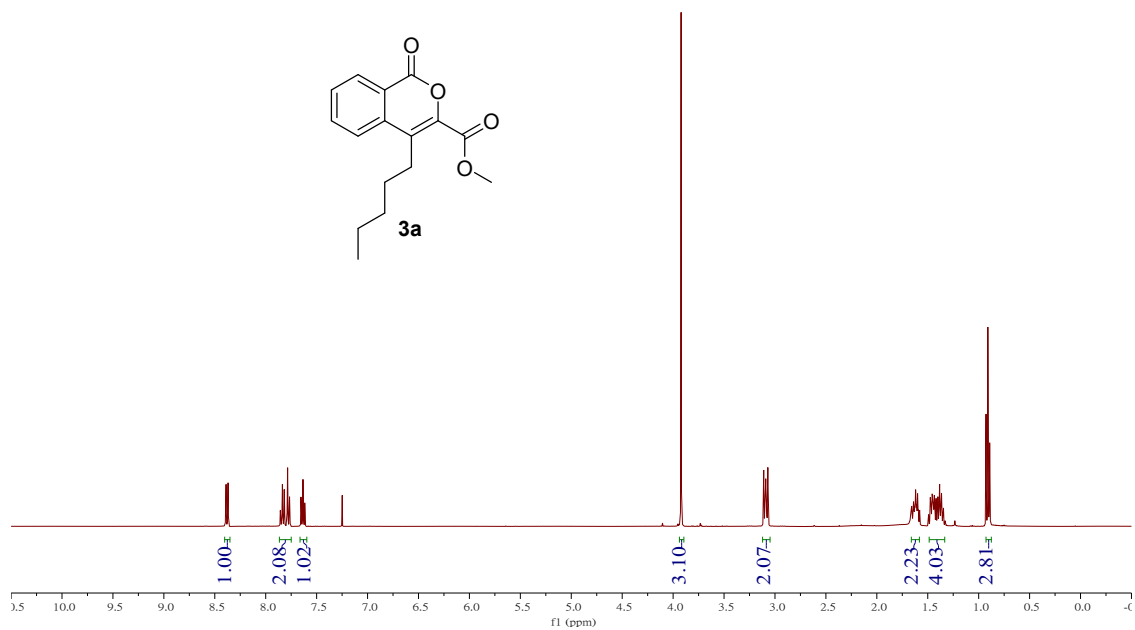

<sup>1</sup>H spectrum (400 MHz) of compound **3a** in CDCl<sub>3</sub>

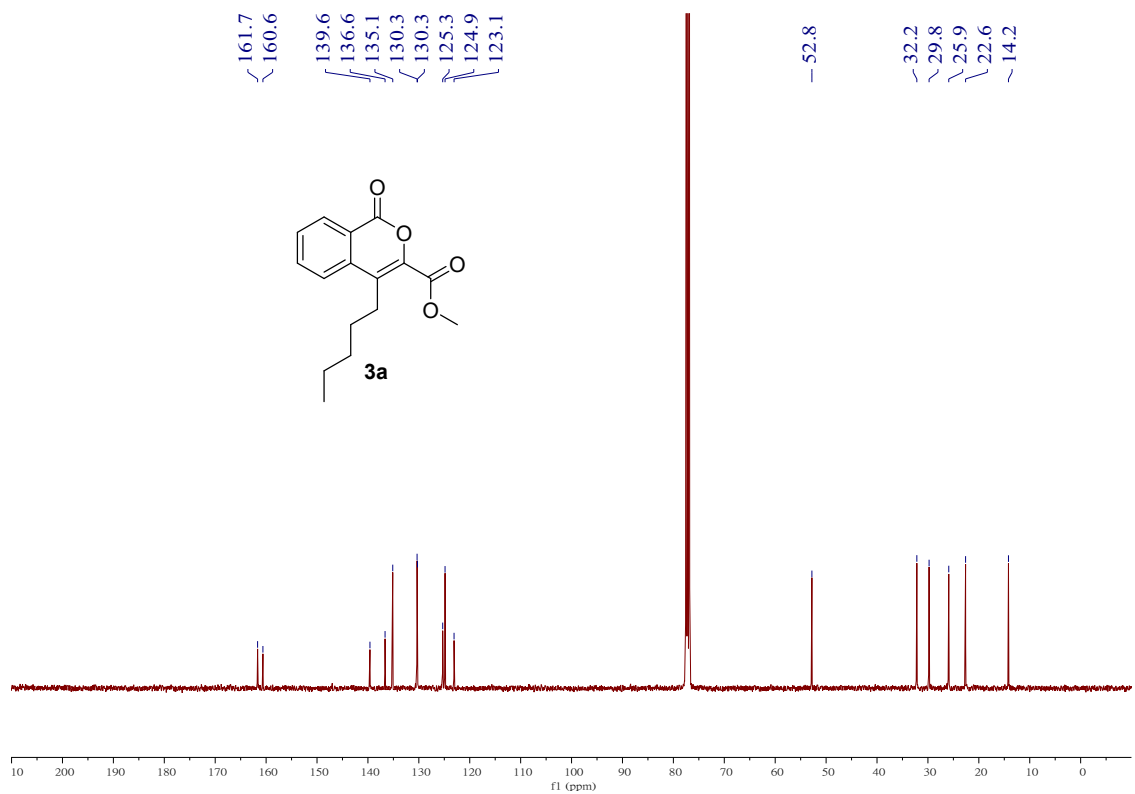

$^{13}\text{C}\{^1\text{H}\}$  spectrum (101 MHz) of compound **3a** in  $\text{CDCl}_3$

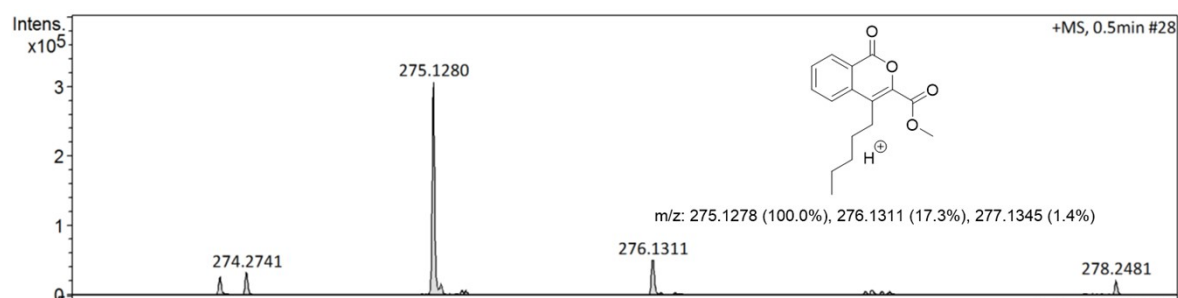

Display Report

| Meas. m/z | # | Ion Formula | m/z      | err [ppm] | mSigma | # Sigma | Score  | rdb | e <sup>-</sup> Conf | N-Rule | Adduct |
|-----------|---|-------------|----------|-----------|--------|---------|--------|-----|---------------------|--------|--------|
| 275.1274  | 1 | C16H19O4    | 275.1278 | 1.5       | 7.0    | 1       | 100.00 | 7.5 | even                | ok     | M+H    |

HRMS Mass (ESI) spectrum of compound **3a**

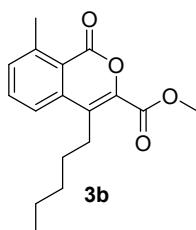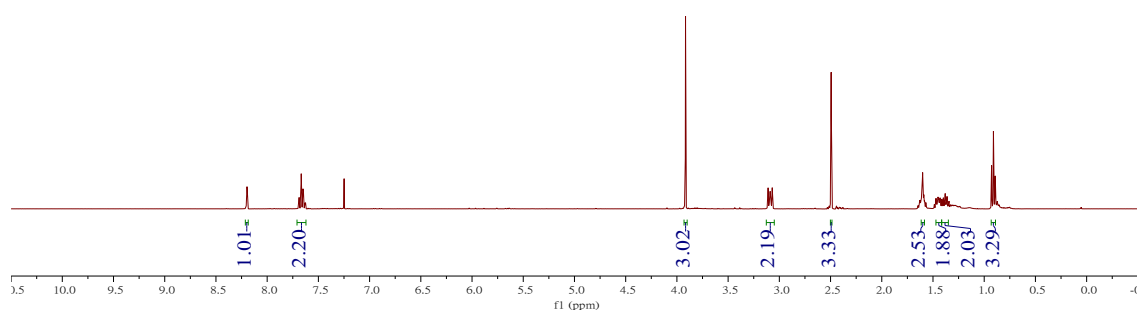

$^1\text{H}$  spectrum (400 MHz) of compound **3b** in  $\text{CDCl}_3$

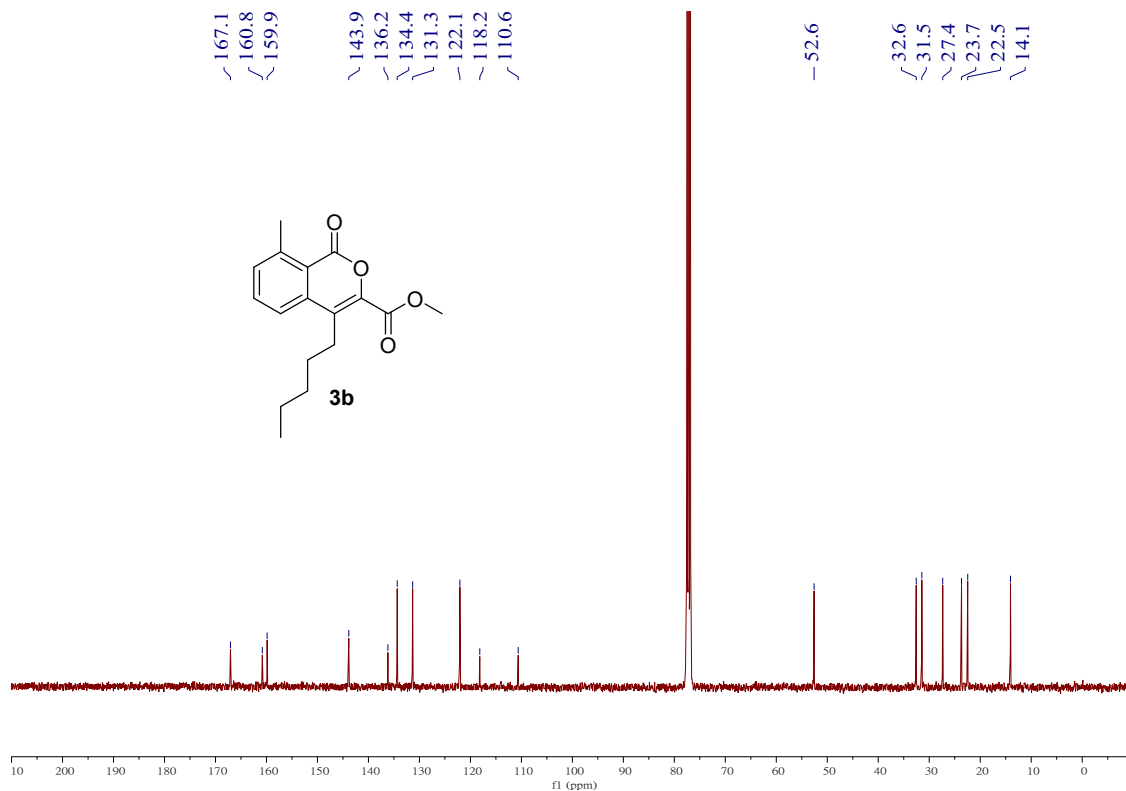

<sup>13</sup>C{<sup>1</sup>H} spectrum (101 MHz) of compound **3b** in CDCl<sub>3</sub>

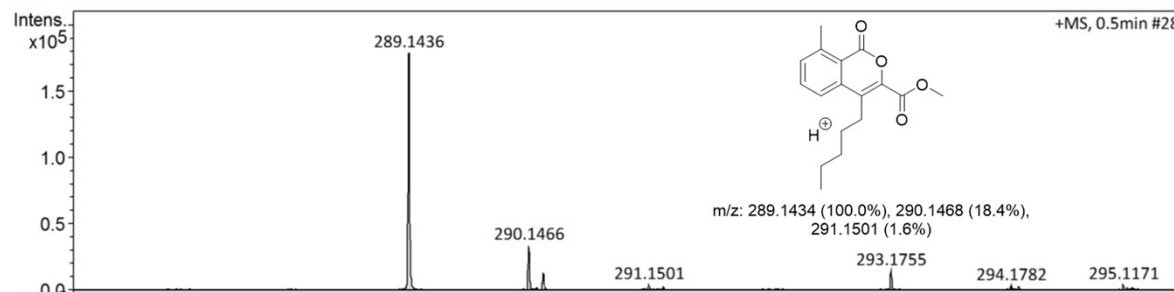

### Display Report

| Meas. m/z | # | Ion Formula                                    | m/z      | err [ppm] | mSigma | # Sigma | Score  | rdb | e <sup>-</sup> Conf | N-Rule | Adduct |
|-----------|---|------------------------------------------------|----------|-----------|--------|---------|--------|-----|---------------------|--------|--------|
| 289.1436  | 1 | C <sub>17</sub> H <sub>21</sub> O <sub>4</sub> | 289.1434 | 0.7       | 1.8    | 1       | 100.00 | 7.5 | even                | ok     | M+H    |

HRMS Mass (ESI) spectrum of compound **3b**

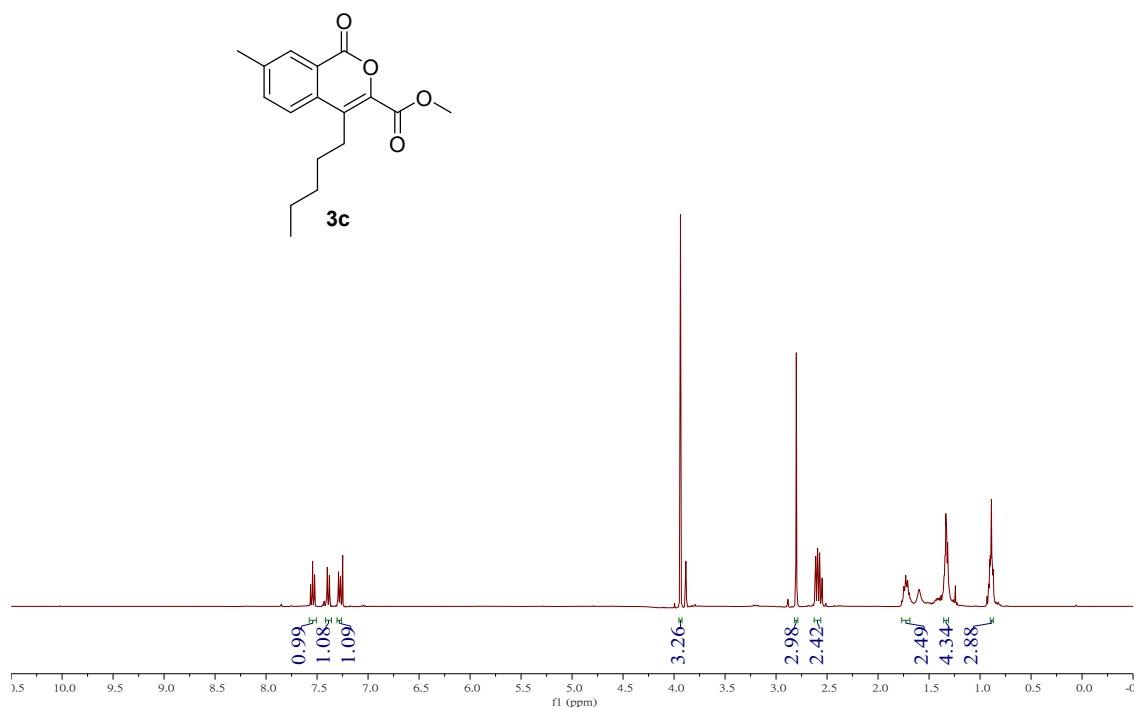

$^1\text{H}$  spectrum (400 MHz) of compound **3c** in  $\text{CDCl}_3$

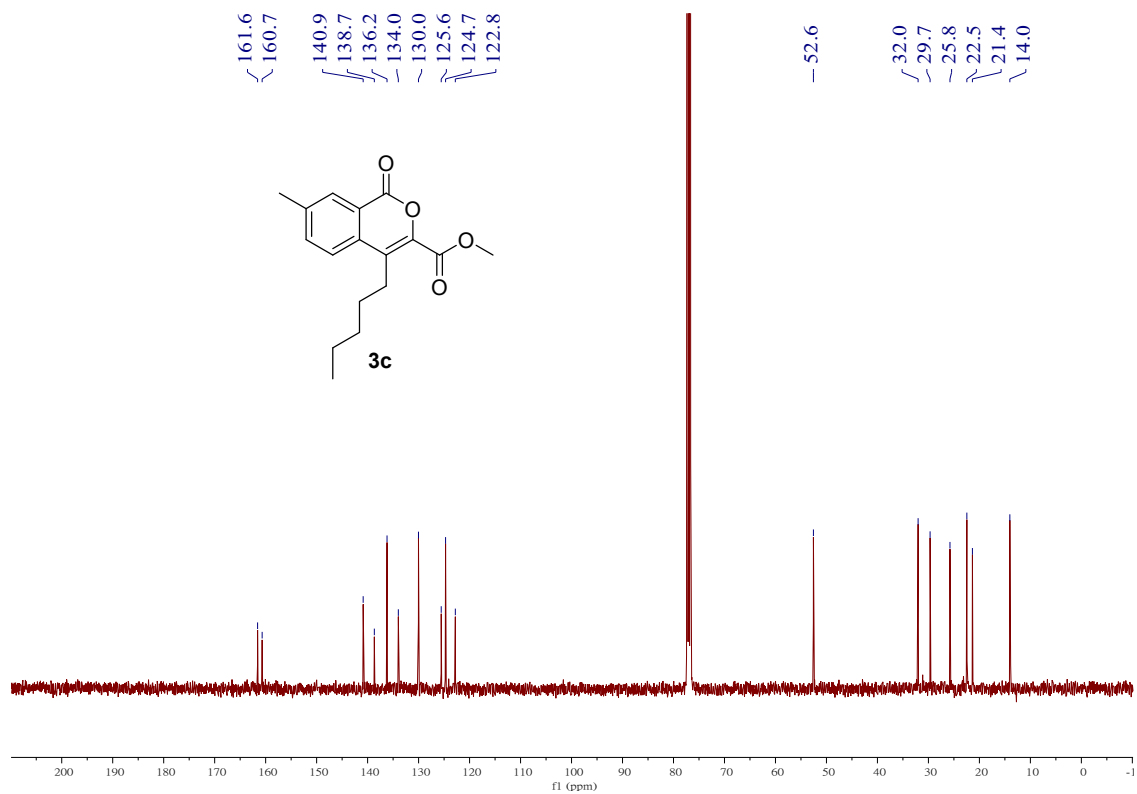



$^{13}\text{C}\{^1\text{H}\}$  spectrum (101 MHz) of compound **3c** in  $\text{CDCl}_3$

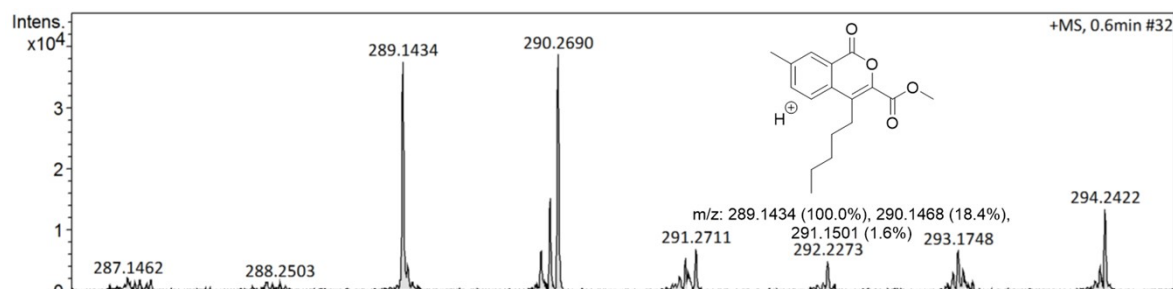

### Display Report

| Meas. m/z | # | Ion Formula | m/z      | err [ppm] | mSigma | # Sigma | Score  | rdb | e <sup>-</sup> Conf | N-Rule | Adduct |
|-----------|---|-------------|----------|-----------|--------|---------|--------|-----|---------------------|--------|--------|
| 289.1434  | 1 | C17H21O4    | 289.1434 | -0.2      | 20.9   | 1       | 100.00 | 7.5 | even                | ok     | M+H    |

HRMS Mass (ESI) spectrum of compound **3c**

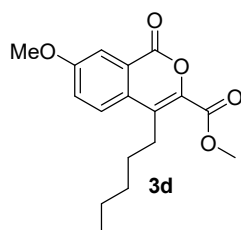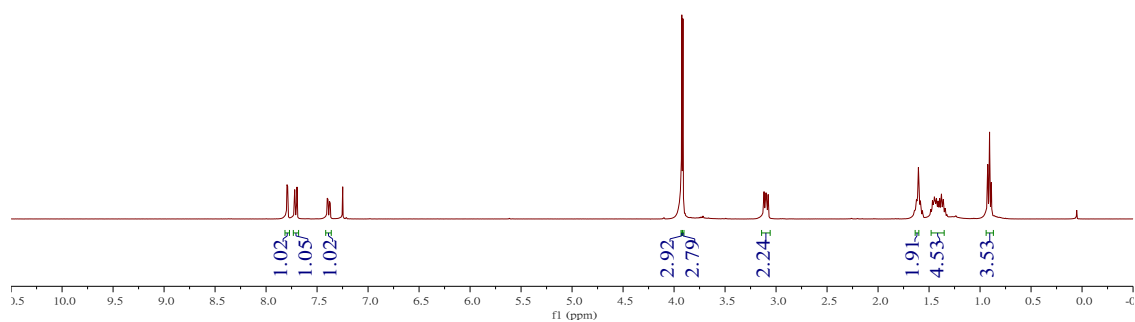

$^1\text{H}$  spectrum (400 MHz) of compound **3d** in  $\text{CDCl}_3$

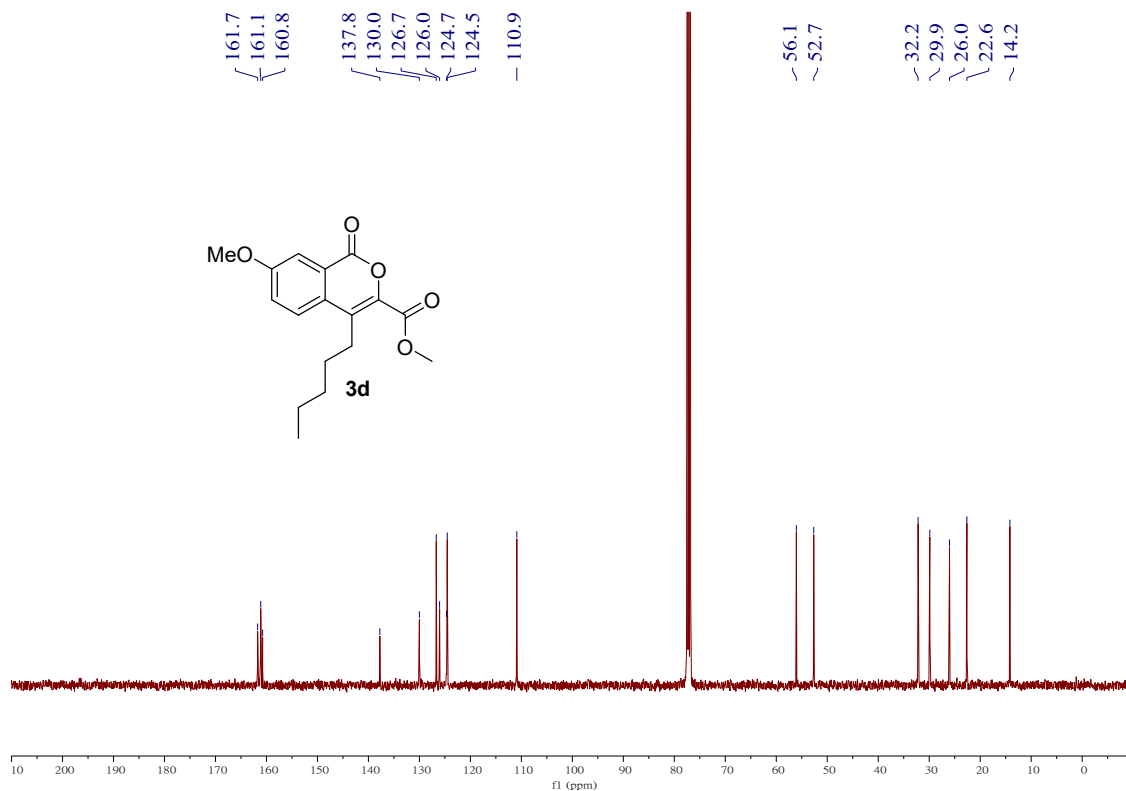

$^{13}\text{C}\{^1\text{H}\}$  spectrum (101 MHz) of compound **3d** in  $\text{CDCl}_3$

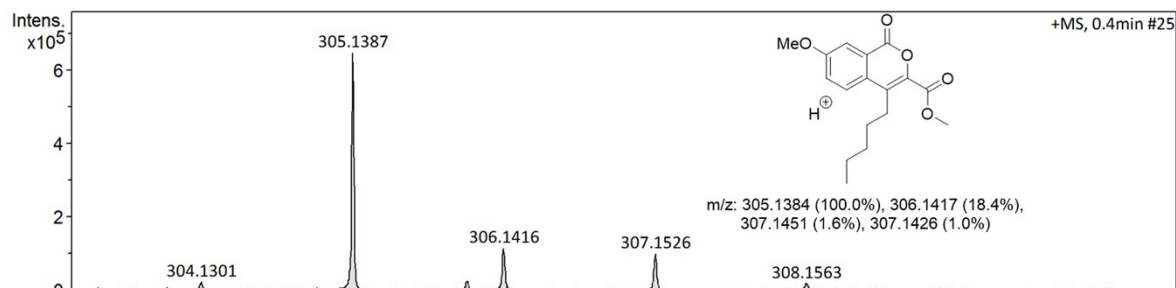

### Display Report

| Meas. m/z | # | Ion Formula                                    | m/z      | err [ppm] | mSigma | # Sigma | Score  | rdb | e <sup>-</sup> Conf | N-Rule | Adduct |
|-----------|---|------------------------------------------------|----------|-----------|--------|---------|--------|-----|---------------------|--------|--------|
| 305.1387  | 1 | C <sub>17</sub> H <sub>21</sub> O <sub>5</sub> | 305.1384 | 1.1       | 74.0   | 1       | 100.00 | 7.5 | even                | ok     | M+H    |

HRMS Mass (ESI) spectrum of compound **3d**

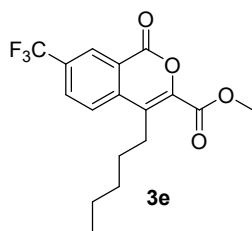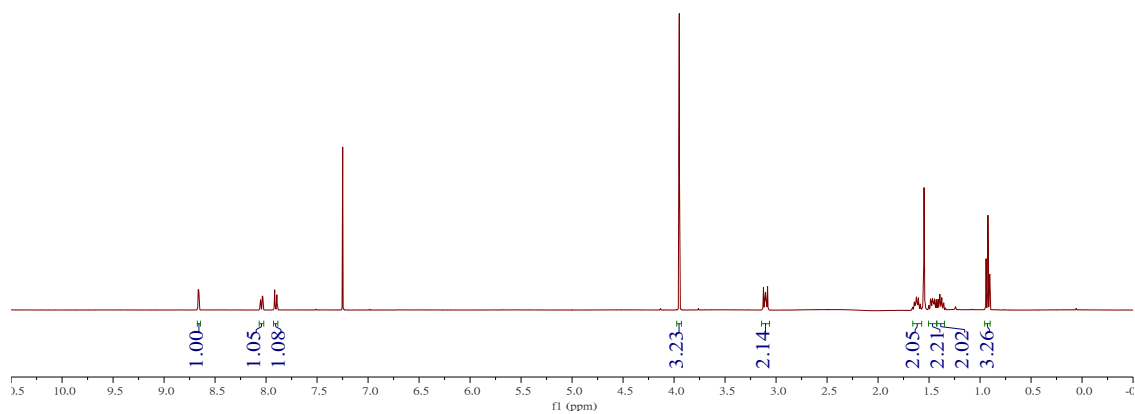

<sup>1</sup>H spectrum (400 MHz) of compound **3e** in CDCl<sub>3</sub>

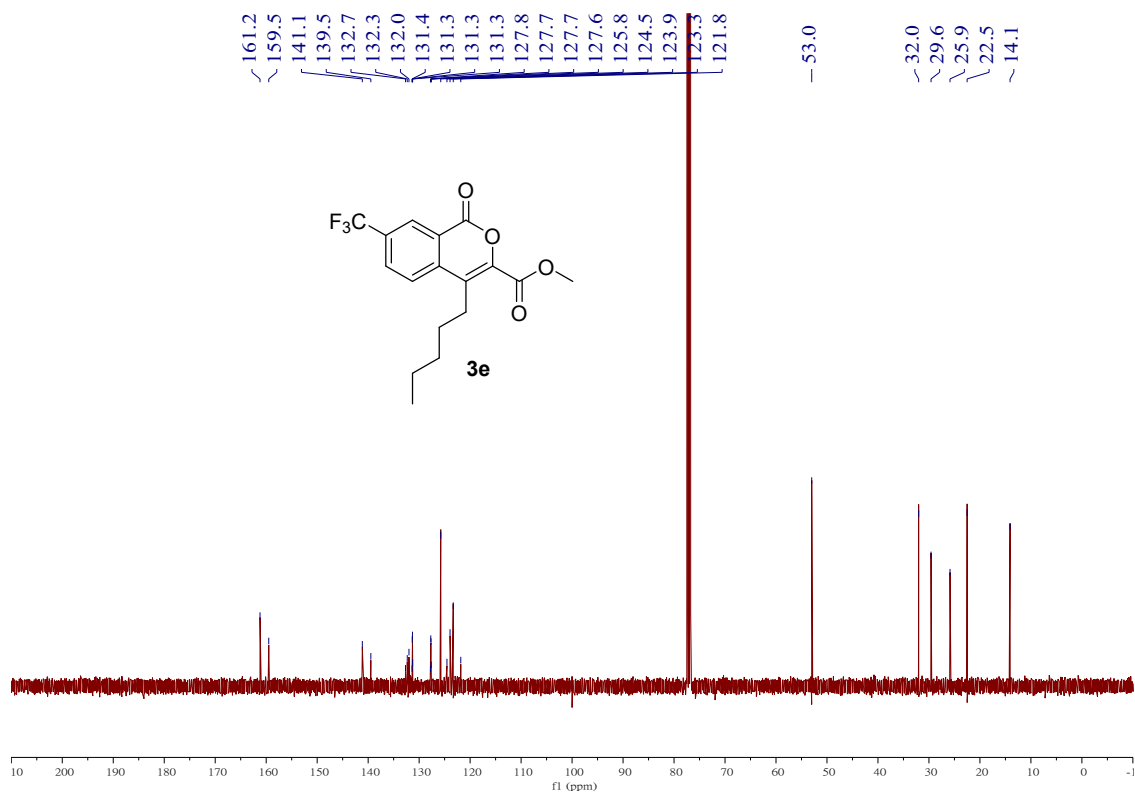

$^{13}\text{C}\{^1\text{H}\}$  spectrum (101 MHz) of compound **3e** in  $\text{CDCl}_3$

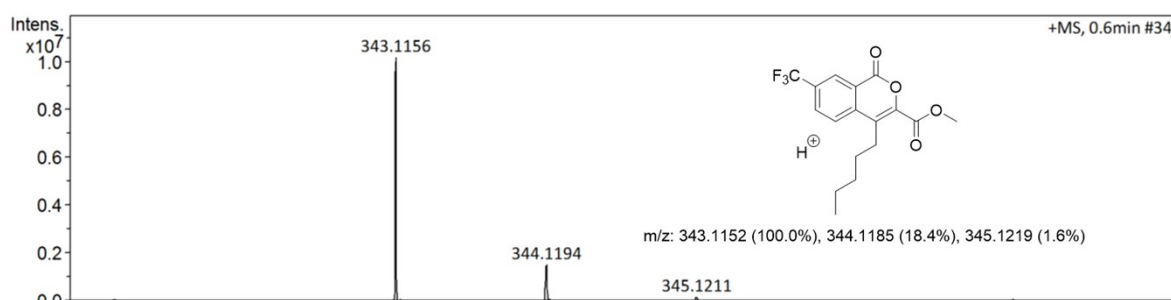

### Display Report

| Meas. m/z | # | Ion Formula | m/z      | err [ppm] | mSigma | # Sigma | Score  | rdb | e <sup>-</sup> Conf | N-Rule | Adduct |
|-----------|---|-------------|----------|-----------|--------|---------|--------|-----|---------------------|--------|--------|
| 343.1156  | 1 | C17H18F3O4  | 343.1152 | -1.4      | 23.2   | 2       | 100.00 | 7.5 | even                | ok     | M+H    |

HRMS Mass (ESI) spectrum of compound **3e**

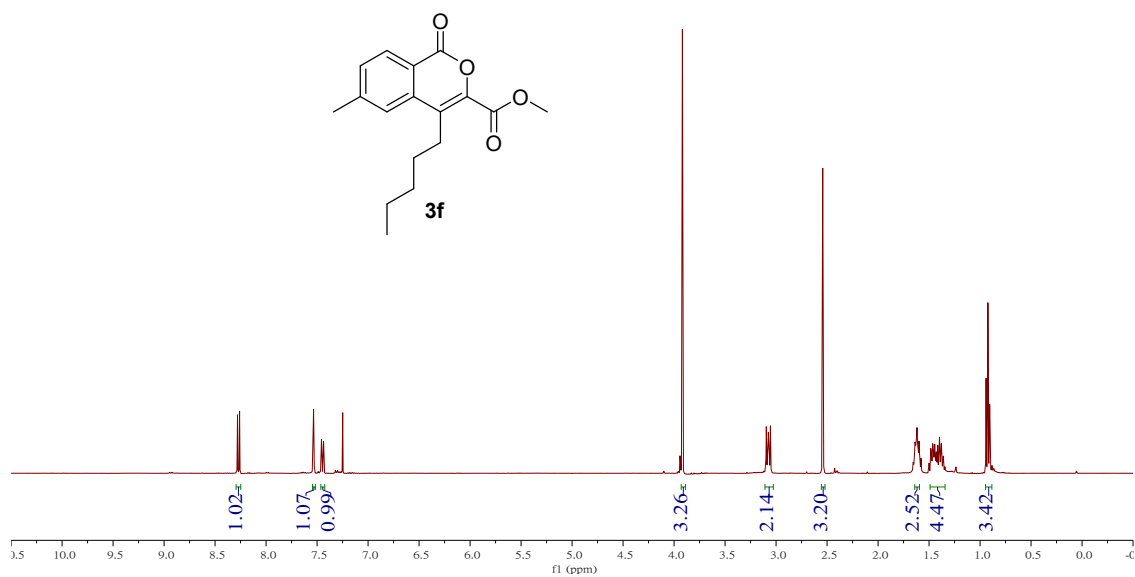

$^1\text{H}$  spectrum (400 MHz) of compound **3f** in  $\text{CDCl}_3$

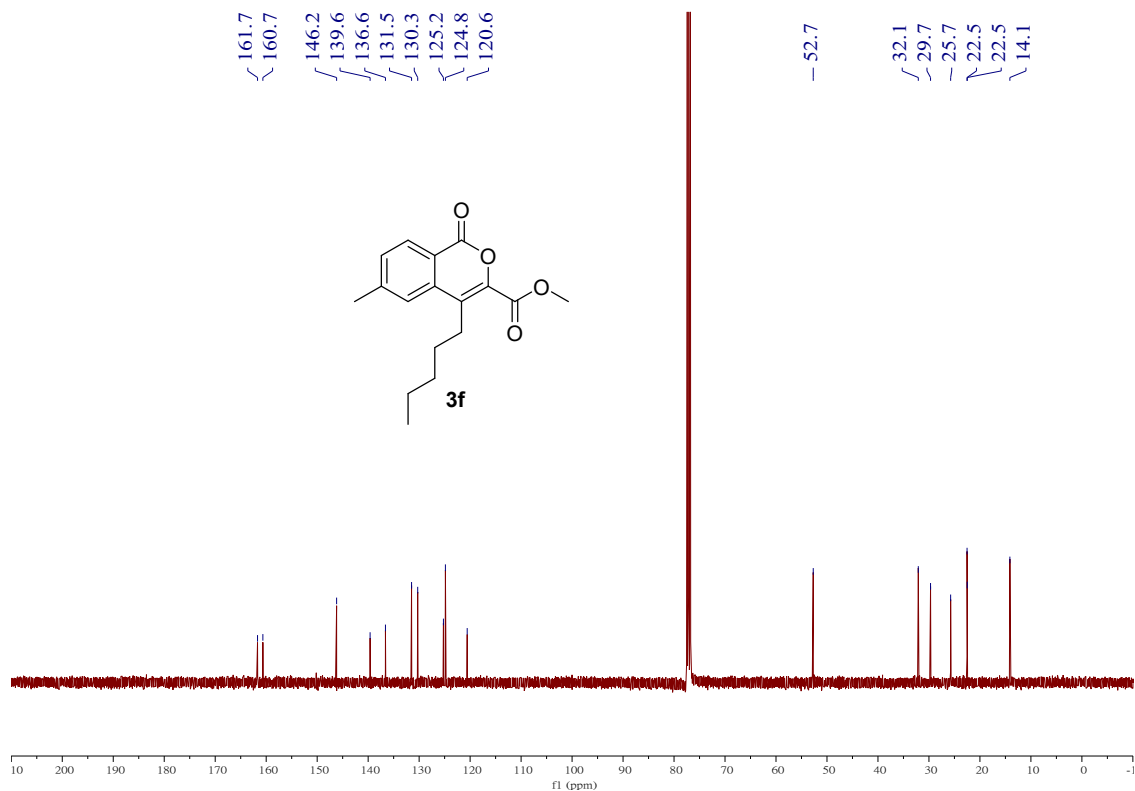

<sup>13</sup>C{<sup>1</sup>H} spectrum (101 MHz) of compound **3f** in CDCl<sub>3</sub>

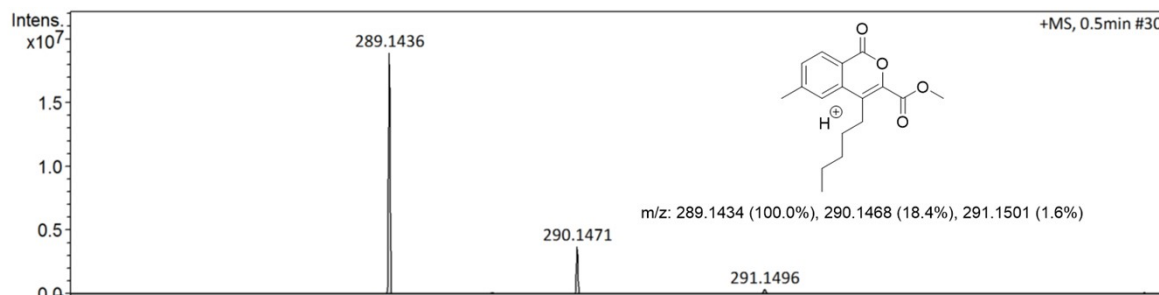

### Display Report

| Meas. m/z | # | Ion Formula                                    | m/z      | err [ppm] | mSigma | # Sigma | Score  | rdB | e <sup>-</sup> Conf | N-Rule | Adduct |
|-----------|---|------------------------------------------------|----------|-----------|--------|---------|--------|-----|---------------------|--------|--------|
| 289.1436  | 1 | C <sub>17</sub> H <sub>21</sub> O <sub>4</sub> | 289.1434 | -0.6      | 6.4    | 1       | 100.00 | 7.5 | even                | ok     | M+H    |

HRMS Mass (ESI) spectrum of compound **3f**

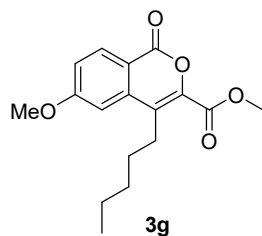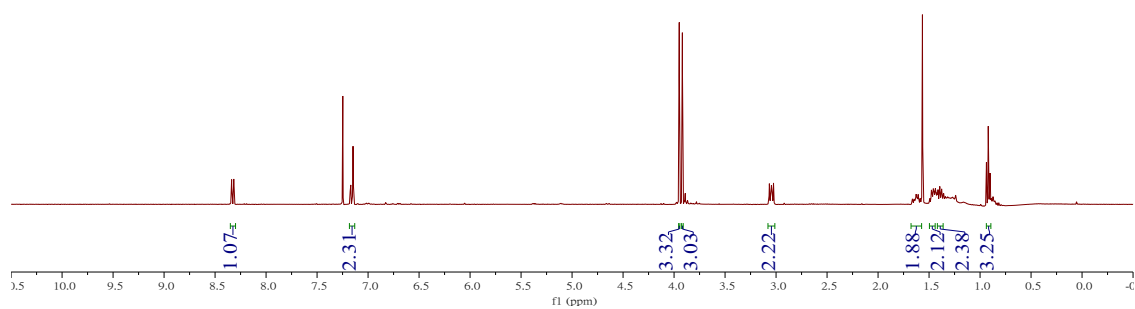

$^1\text{H}$  spectrum (400 MHz) of compound **3g** in  $\text{CDCl}_3$

~ 165.0  
~ 161.8  
~ 140.2  
~ 138.9  
~ 132.7  
~ 124.9  
~ 117.0  
~ 116.1  
~ 116.1  
~ 108.6  
~ 55.9  
~ 52.8  
~ 32.2  
~ 29.5  
~ 26.0  
~ 22.6  
~ 14.2

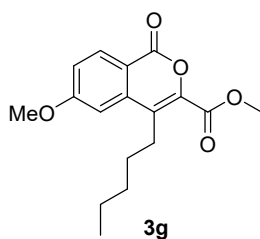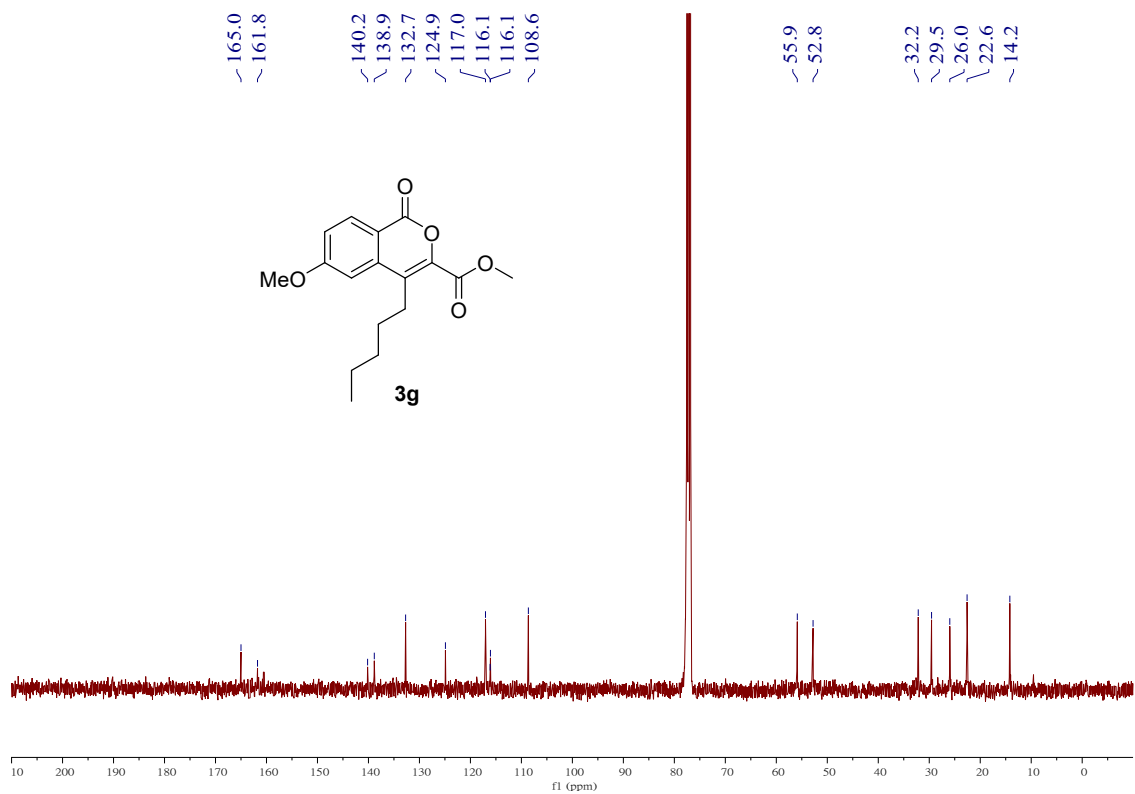

$^{13}\text{C}\{^1\text{H}\}$  spectrum (101 MHz) of compound **3g** in  $\text{CDCl}_3$

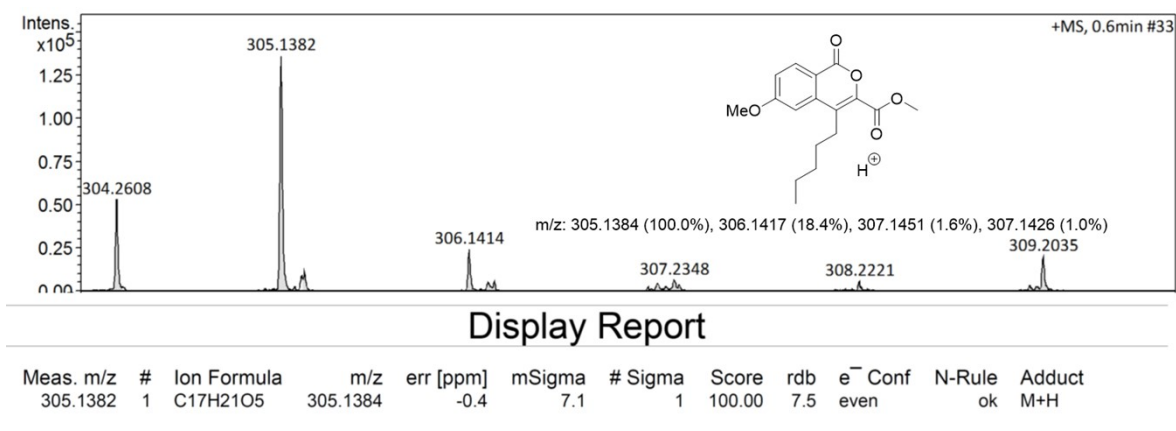

HRMS Mass (ESI) spectrum of compound **3g**

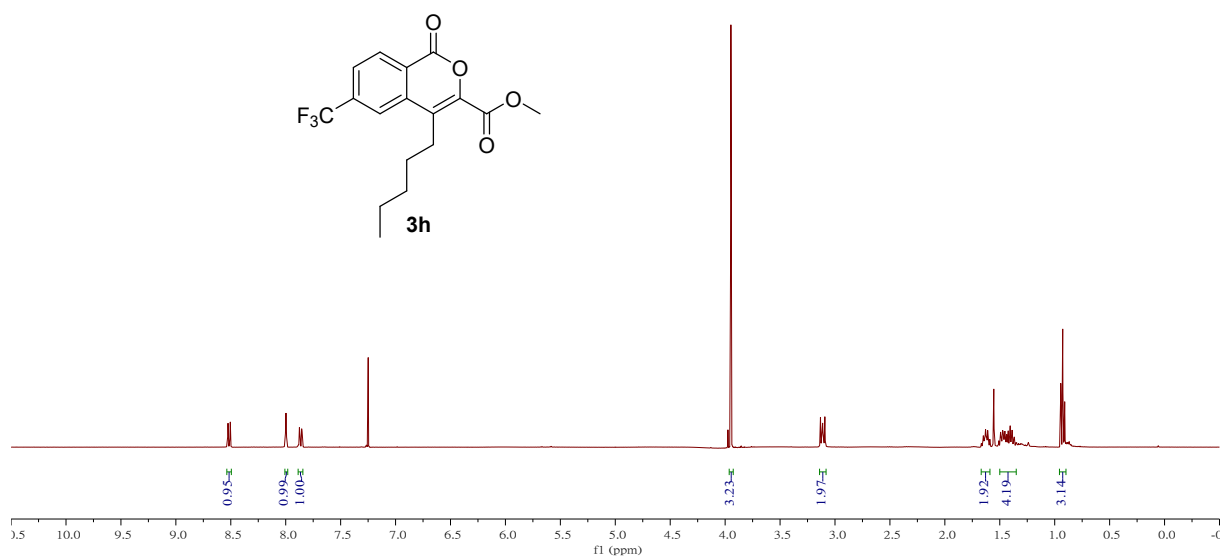

$^1\text{H}$  spectrum (400 MHz) of compound **3h** in  $\text{CDCl}_3$

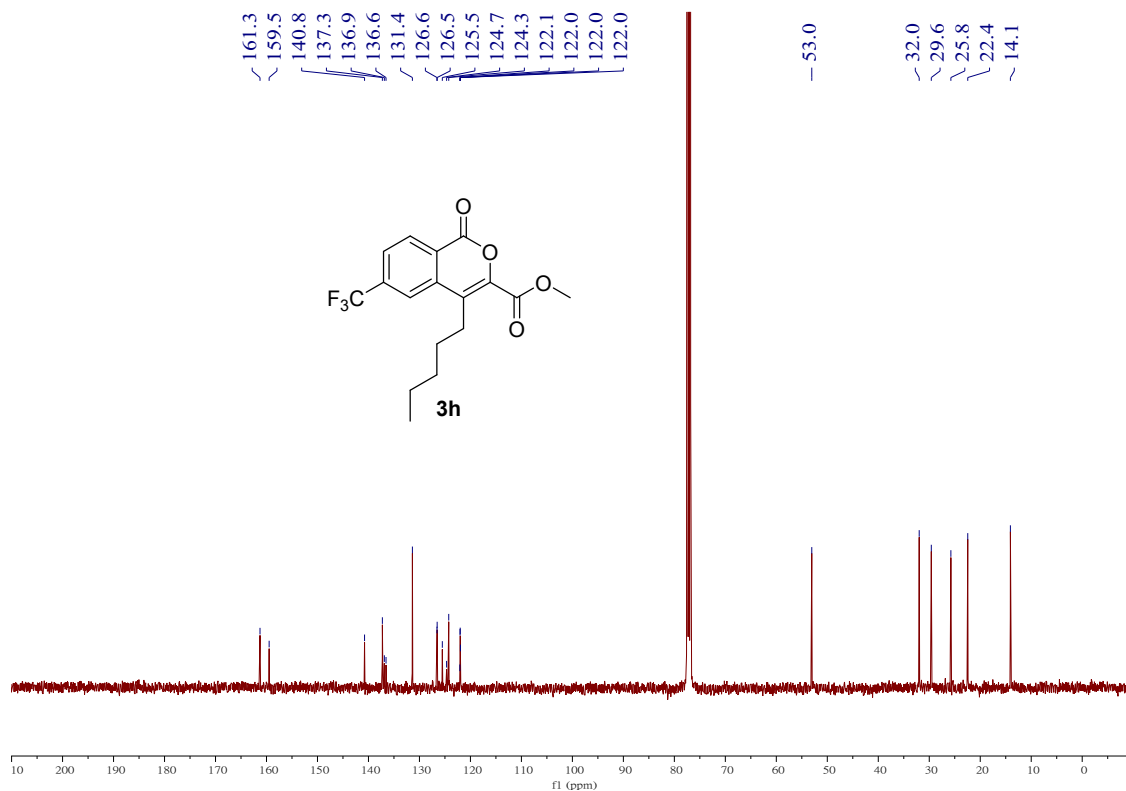

<sup>13</sup>C{<sup>1</sup>H} spectrum (101 MHz) of compound **3h** in CDCl<sub>3</sub>

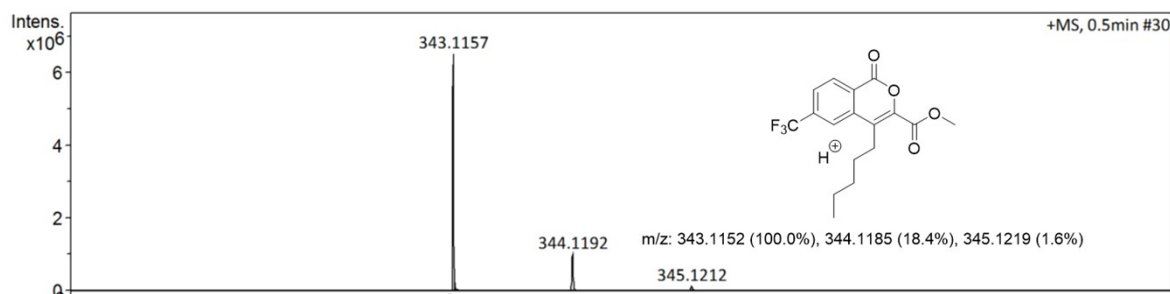

### Display Report

| Meas. m/z | # | Ion Formula                                                   | m/z      | err [ppm] | mSigma | # Sigma | Score  | rdb | e <sup>-</sup> Conf | N-Rule | Adduct |
|-----------|---|---------------------------------------------------------------|----------|-----------|--------|---------|--------|-----|---------------------|--------|--------|
| 343.1157  | 1 | C <sub>17</sub> H <sub>18</sub> F <sub>3</sub> O <sub>4</sub> | 343.1152 | 1.4       | 19.3   | 2       | 100.00 | 7.5 | even                | ok     | M+H    |

HRMS Mass (ESI) spectrum of compound **3h**



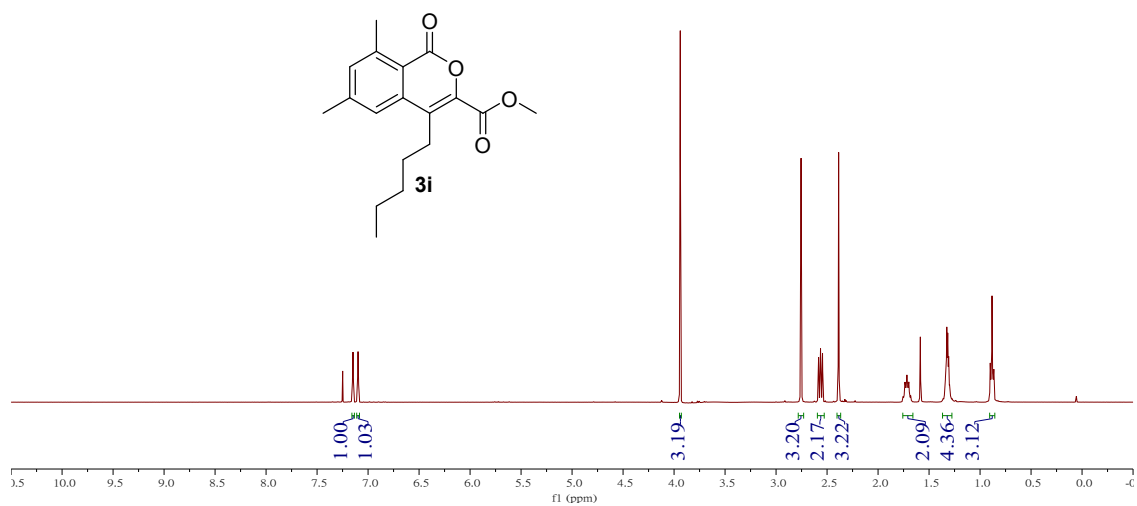

<sup>1</sup>H spectrum (400 MHz) of compound **3i** in CDCl<sub>3</sub>

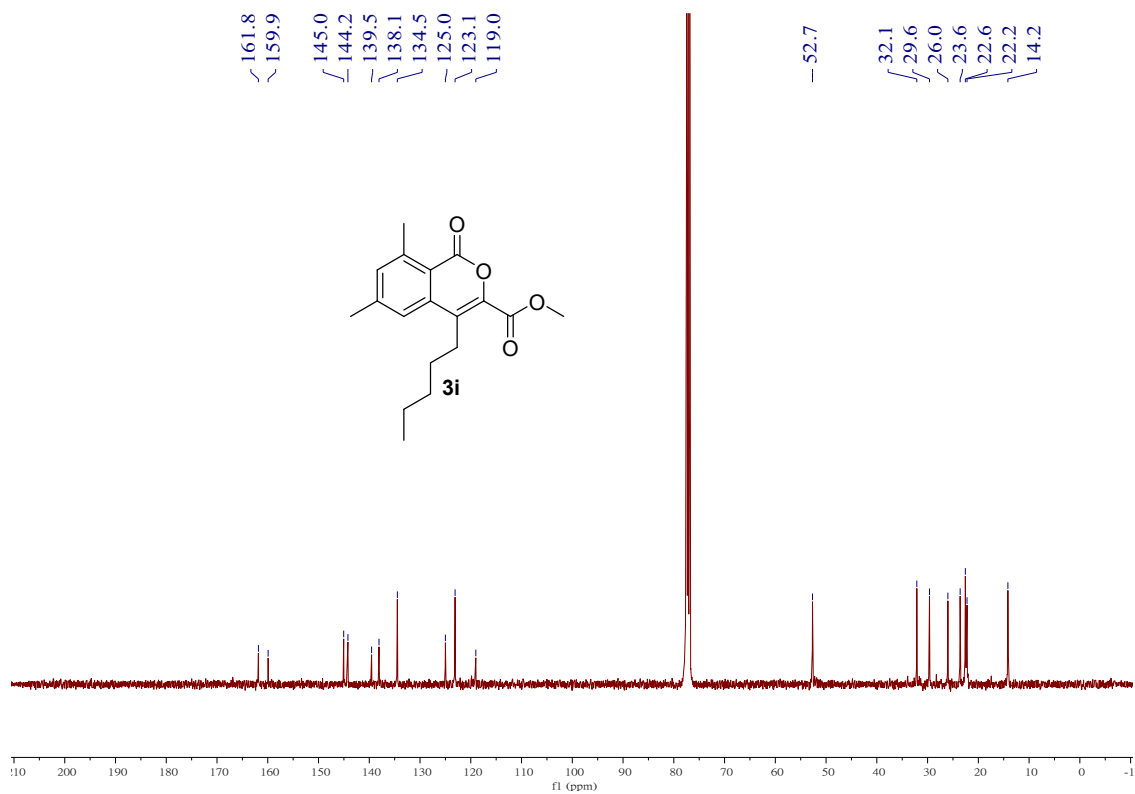

$^{13}\text{C}\{^1\text{H}\}$  spectrum (101 MHz) of compound **3i** in  $\text{CDCl}_3$

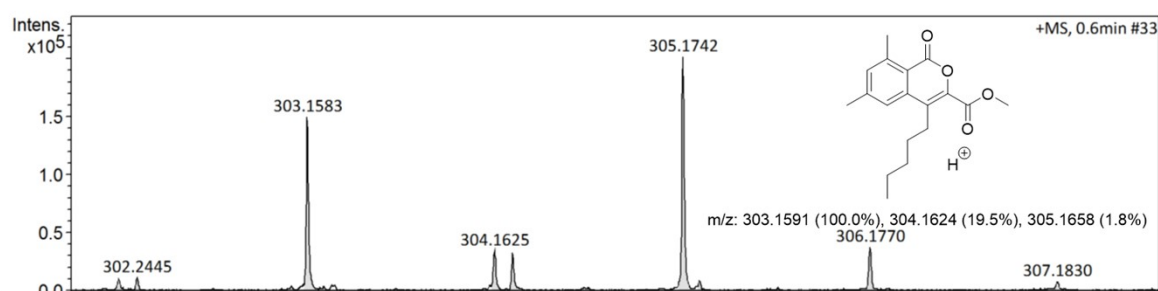

Display Report

| Meas. m/z | # | Ion Formula | m/z      | err [ppm] | mSigma | # Sigma | Score  | rdb | e <sup>-</sup> Conf | N-Rule | Adduct |
|-----------|---|-------------|----------|-----------|--------|---------|--------|-----|---------------------|--------|--------|
| 303.1583  | 1 | C18H23O4    | 303.1591 | 2.5       | 23.6   | 1       | 100.00 | 7.5 | even                | ok     | M+H    |

HRMS Mass (ESI) spectrum of compound **3i**

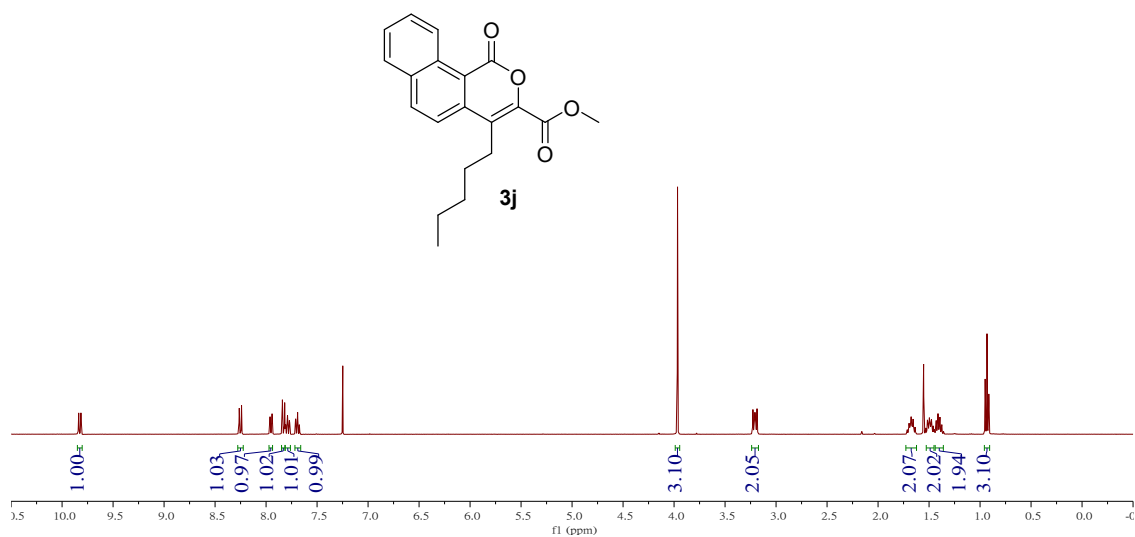

$^1\text{H}$  spectrum (400 MHz) of compound **3j** in  $\text{CDCl}_3$

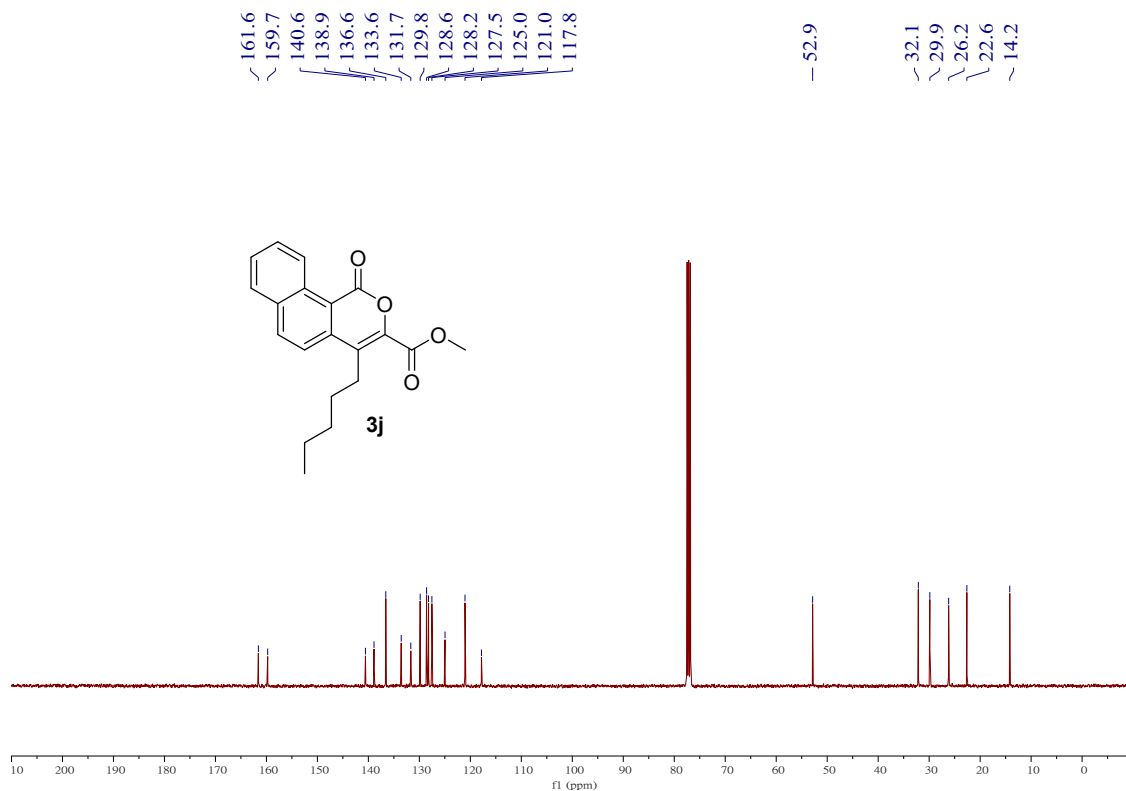

$^{13}\text{C}\{^1\text{H}\}$  spectrum (101 MHz) of compound **3j** in  $\text{CDCl}_3$

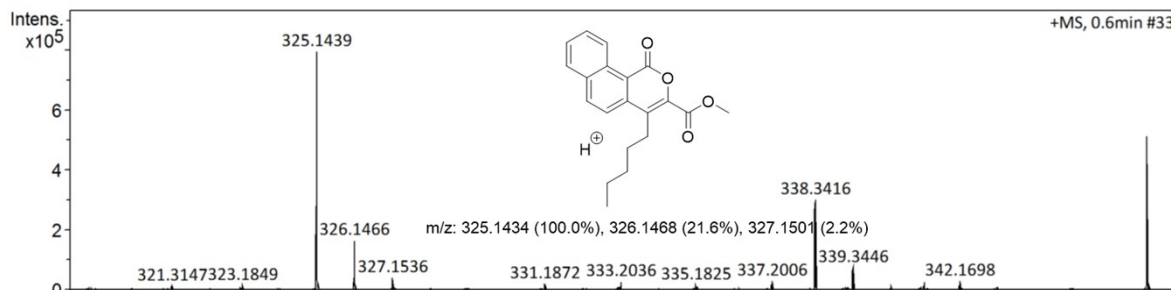

### Display Report

| Meas. m/z | # | Ion Formula                                    | m/z      | err [ppm] | mSigma | # Sigma | Score  | rdb  | e <sup>-</sup> Conf | N-Rule | Adduct |
|-----------|---|------------------------------------------------|----------|-----------|--------|---------|--------|------|---------------------|--------|--------|
| 325.1439  | 1 | C <sub>20</sub> H <sub>21</sub> O <sub>4</sub> | 325.1434 | -1.4      | 13.7   | 1       | 100.00 | 10.5 | even                | ok     | M+H    |

HRMS Mass (ESI) spectrum of compound **3j**

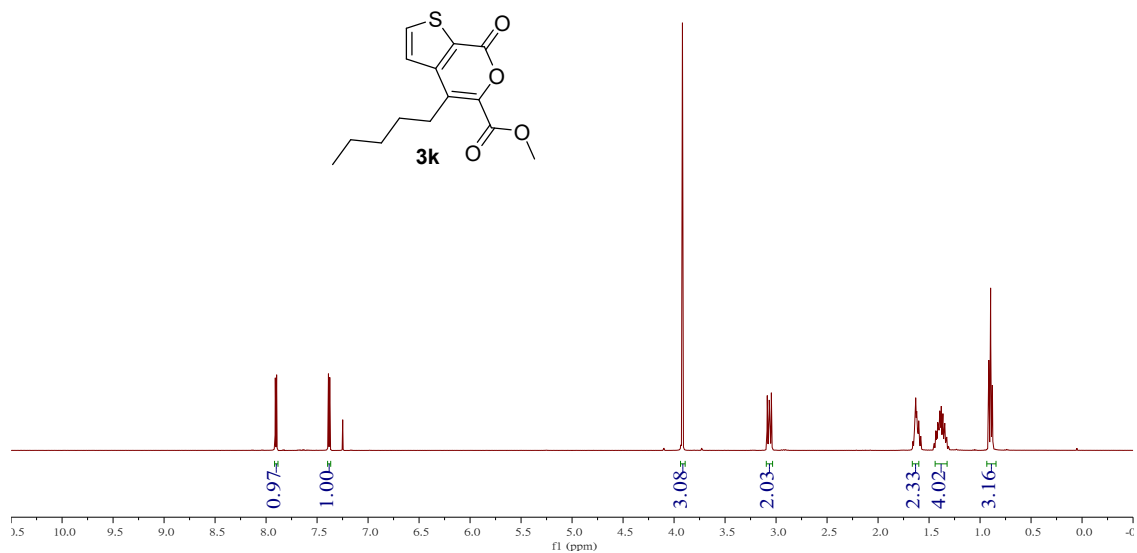

<sup>1</sup>H spectrum (400 MHz) of compound **3k** in CDCl<sub>3</sub>

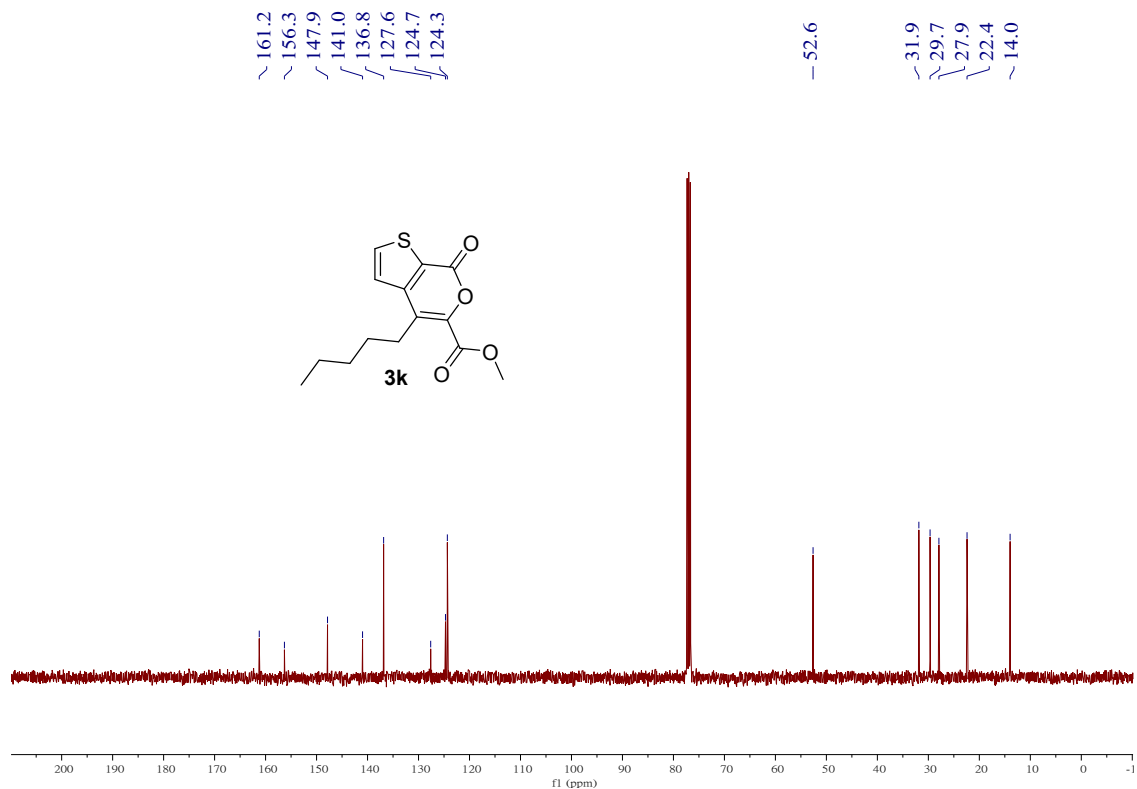

$^{13}\text{C}\{^1\text{H}\}$  spectrum (101 MHz) of compound **3k** in  $\text{CDCl}_3$

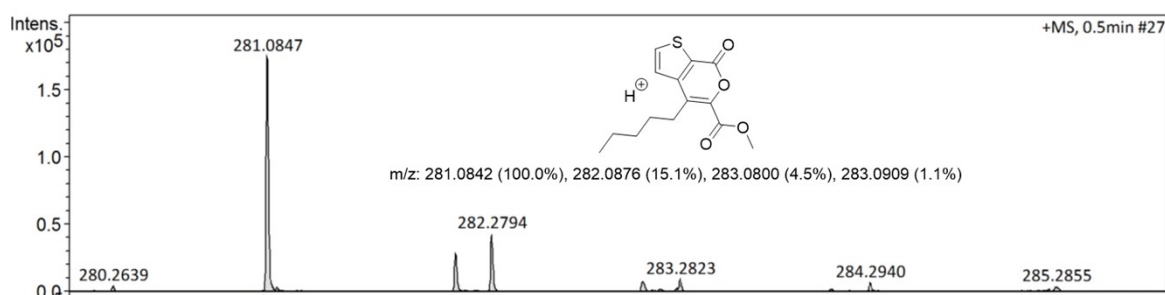

### Display Report

| Meas. m/z | # | Ion Formula                                      | m/z      | err [ppm] | mSigma | # Sigma | Score  | rdb | e <sup>-</sup> Conf | N-Rule | Adduct |
|-----------|---|--------------------------------------------------|----------|-----------|--------|---------|--------|-----|---------------------|--------|--------|
| 281.0847  | 1 | C <sub>14</sub> H <sub>17</sub> O <sub>4</sub> S | 281.0842 | 1.6       | 10.7   | 1       | 100.00 | 6.5 | even                | ok     | M+H    |

HRMS Mass (ESI) spectrum of compound **3k**

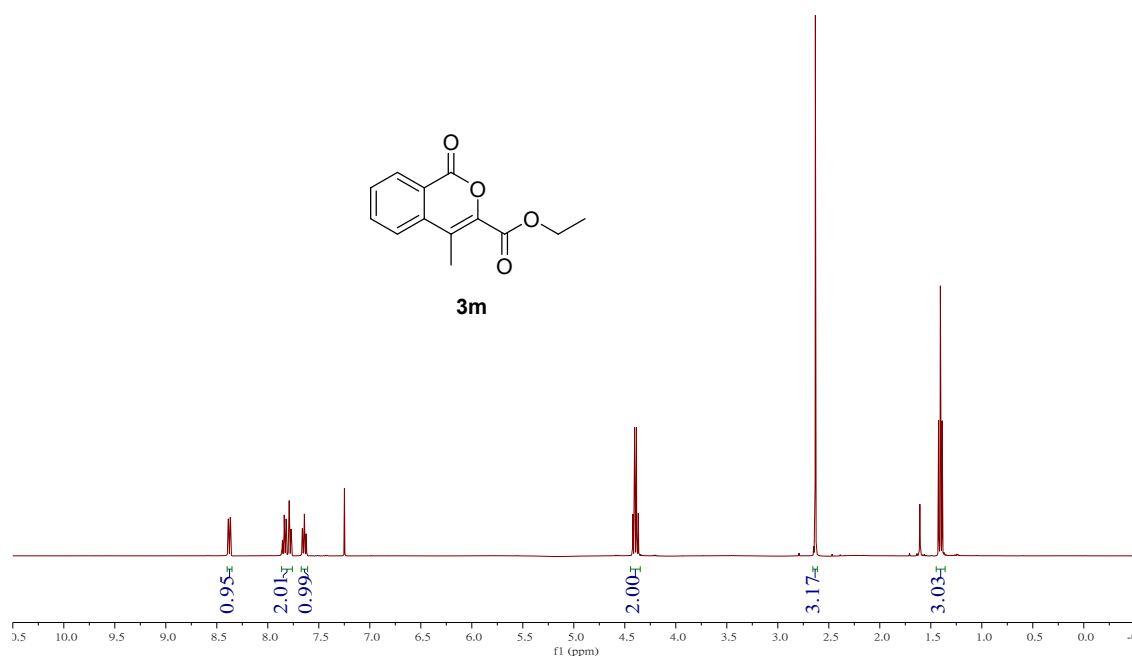

$^1\text{H}$  spectrum (400 MHz) of compound **3m** in  $\text{CDCl}_3$

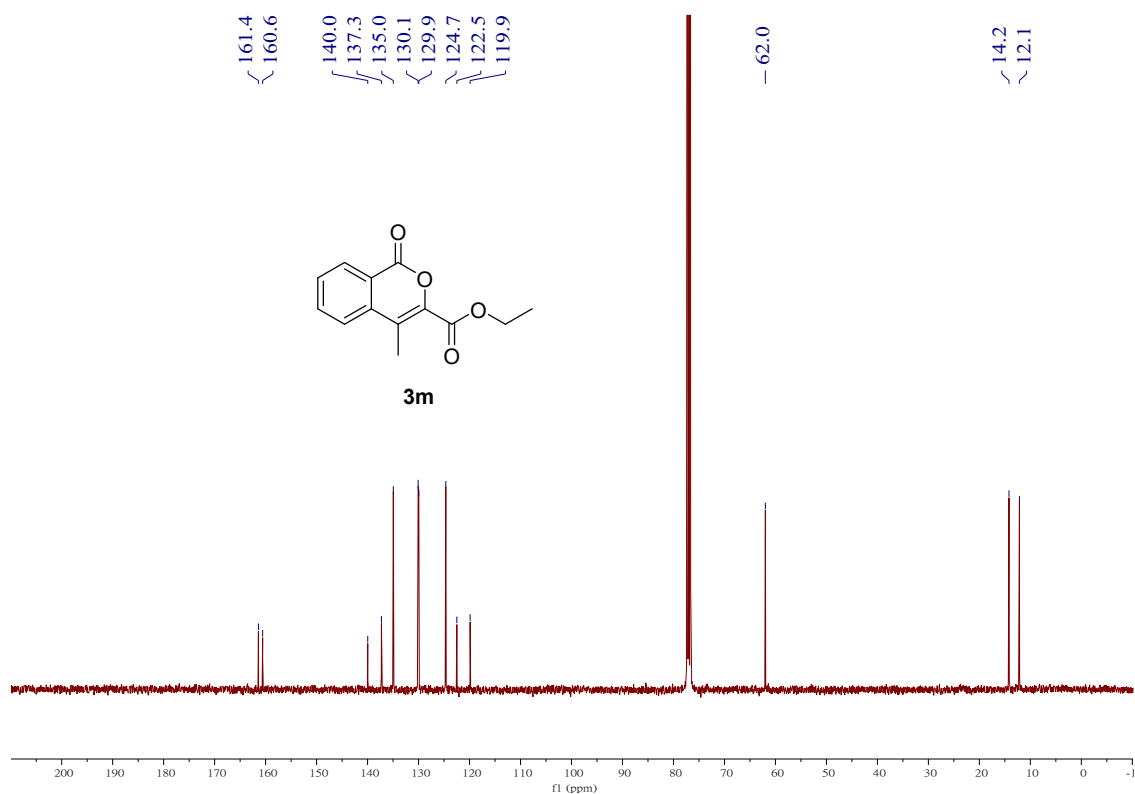

$^{13}\text{C}\{^1\text{H}\}$  spectrum (101 MHz) of compound **3m** in  $\text{CDCl}_3$

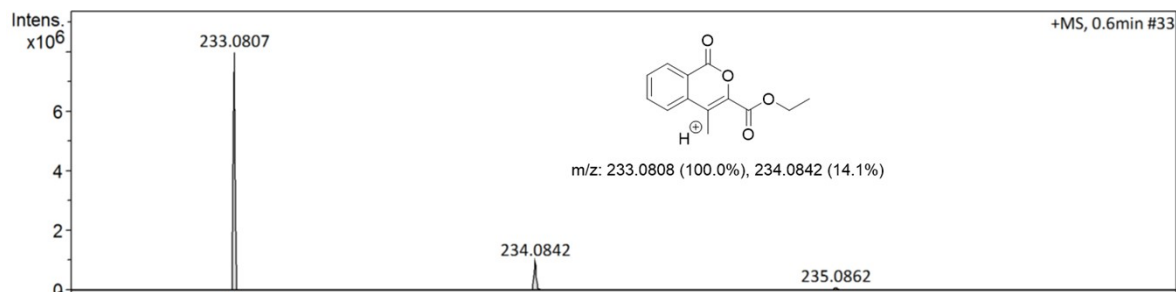

### Display Report

| Meas. m/z | # | Ion Formula                                    | m/z      | err [ppm] | mSigma | # Sigma | Score  | rdb | e <sup>-</sup> Conf | N-Rule | Adduct |
|-----------|---|------------------------------------------------|----------|-----------|--------|---------|--------|-----|---------------------|--------|--------|
| 233.0807  | 1 | C <sub>13</sub> H <sub>13</sub> O <sub>4</sub> | 233.0808 | 0.5       | 12.6   | 1       | 100.00 | 7.5 | even                | ok     | M+H    |

HRMS Mass (ESI) spectrum of compound **3m**

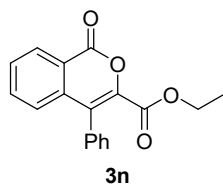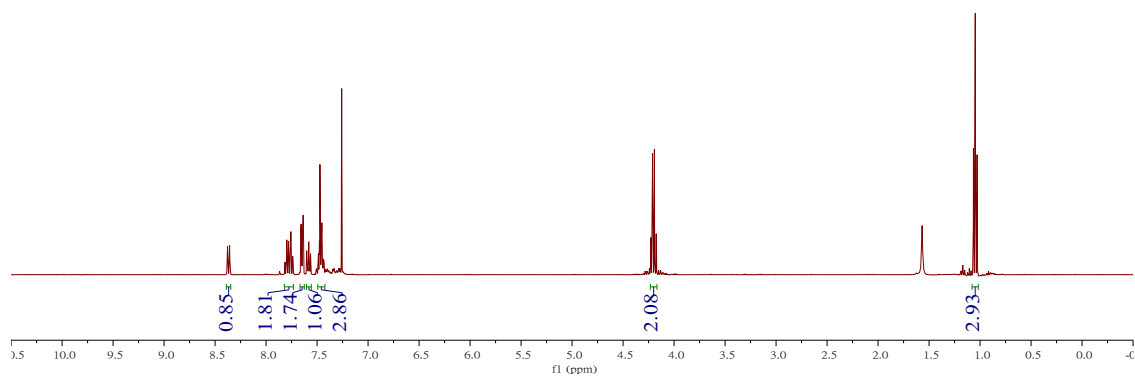

<sup>1</sup>H spectrum (400 MHz) of compound **3n** in CDCl<sub>3</sub>

166.4  
161.2  
155.5  
135.4  
134.8  
132.7  
130.6  
130.0  
128.9  
128.6  
128.3  
124.2  
119.9  
111.0  
62.0  
13.7

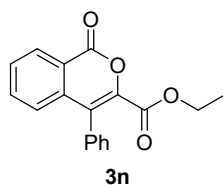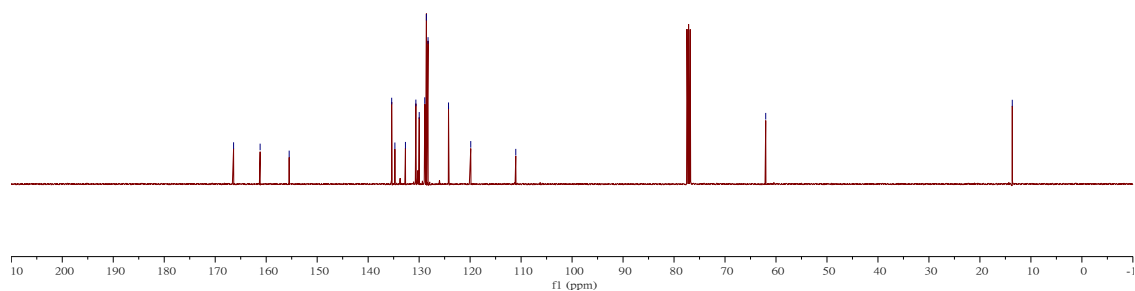

$^{13}\text{C}\{^1\text{H}\}$  spectrum (101 MHz) of compound **3n** in  $\text{CDCl}_3$

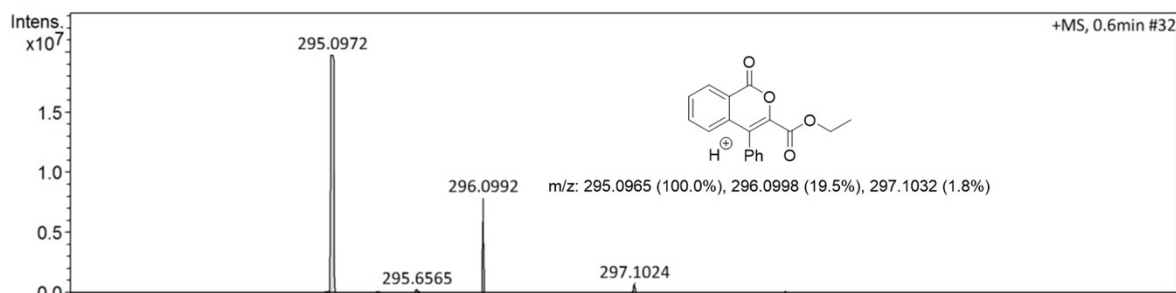

Display Report

| Meas. m/z | # | Ion Formula | m/z      | err [ppm] | mSigma | # Sigma | Score  | rdb  | e <sup>-</sup> Conf | N-Rule | Adduct |
|-----------|---|-------------|----------|-----------|--------|---------|--------|------|---------------------|--------|--------|
| 295.0972  | 1 | C18H15O4    | 295.0965 | -2.4      | 116.9  | 2       | 100.00 | 11.5 | even                | ok     | M+H    |

HRMS Mass (ESI) spectrum of compound **3n**

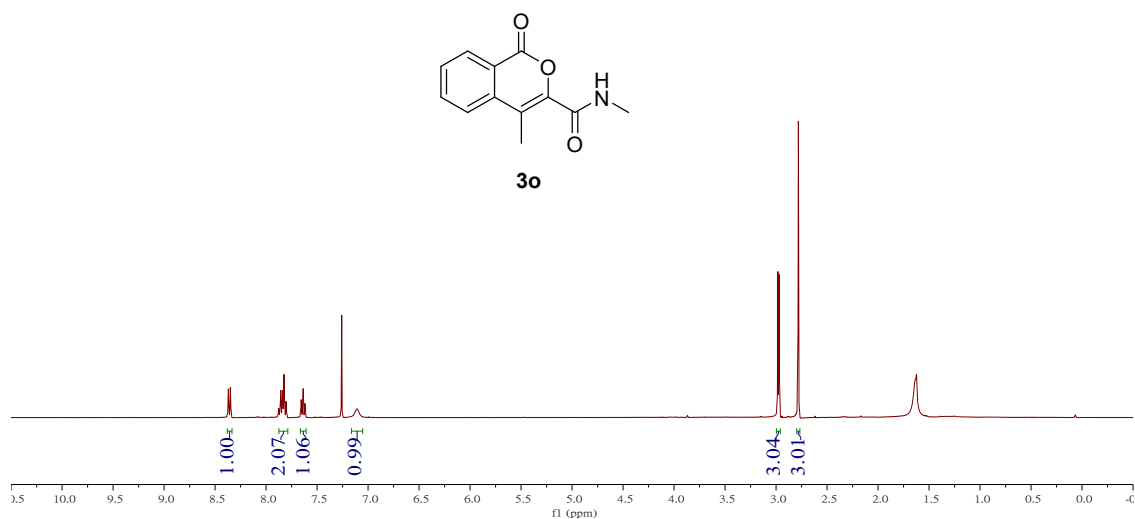

$^1\text{H}$  spectrum (400 MHz) of compound **3o** in  $\text{CDCl}_3$



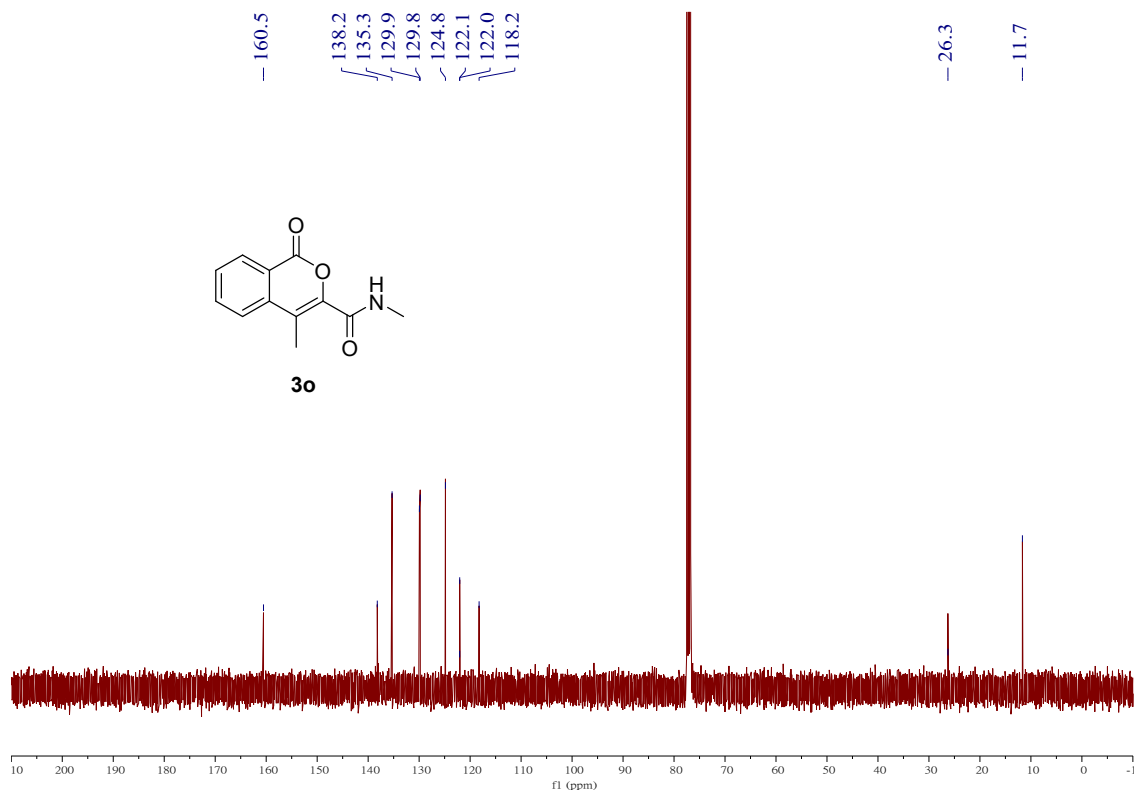

<sup>13</sup>C{<sup>1</sup>H} spectrum (101 MHz) of compound **3o** in CDCl<sub>3</sub>

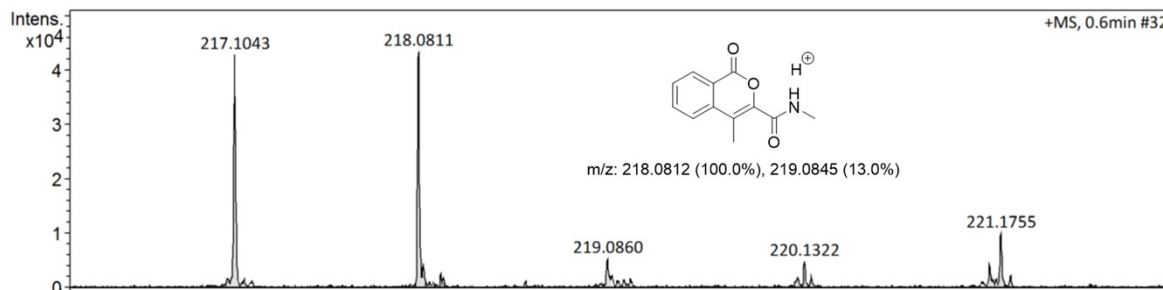

### Display Report

| Meas. m/z | # | Ion Formula                                     | m/z      | err [ppm] | mSigma | # Sigma | Score  | rdB | e <sup>-</sup> Conf | N-Rule | Adduct |
|-----------|---|-------------------------------------------------|----------|-----------|--------|---------|--------|-----|---------------------|--------|--------|
| 218.0811  | 1 | C <sub>12</sub> H <sub>12</sub> NO <sub>3</sub> | 218.0812 | -0.4      | 17.9   | 1       | 100.00 | 7.5 | even                | ok     | M+H    |

HRMS Mass (ESI) spectrum of compound **3o**

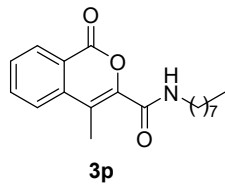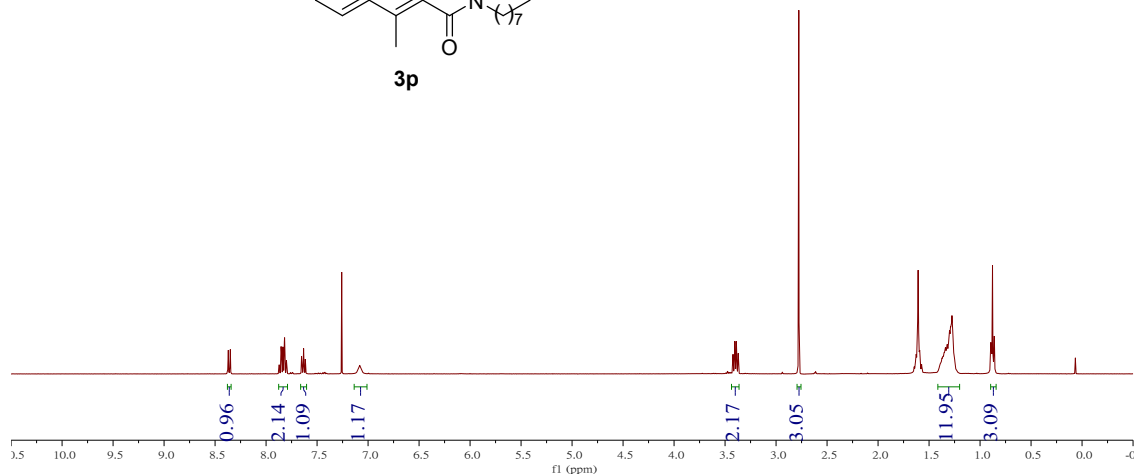

<sup>1</sup>H spectrum (400 MHz) of compound **3p** in CDCl<sub>3</sub>

161.0  
160.6  
141.2  
138.3  
135.3  
129.9  
129.7  
124.8  
122.0  
118.2

39.7  
31.9  
29.5  
29.3  
29.3  
27.1  
22.7  
14.2  
11.7

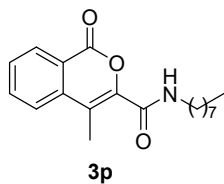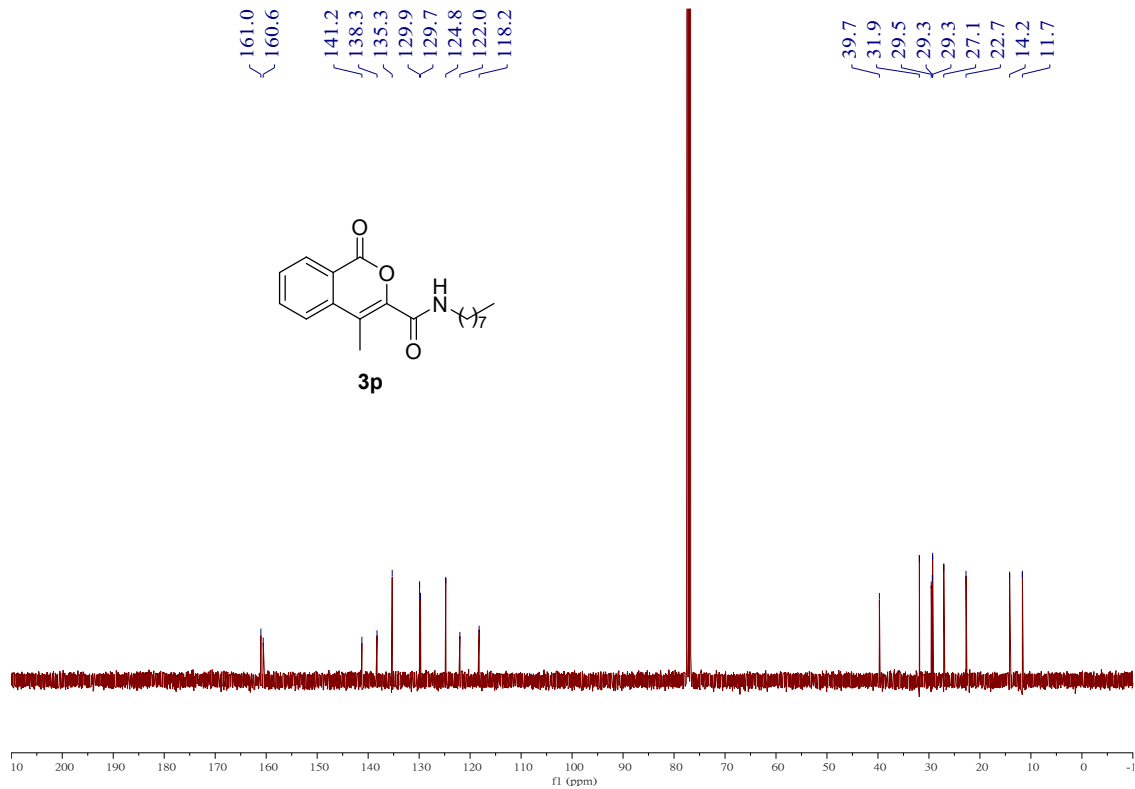

$^{13}\text{C}\{^1\text{H}\}$  spectrum (101 MHz) of compound **3p** in  $\text{CDCl}_3$

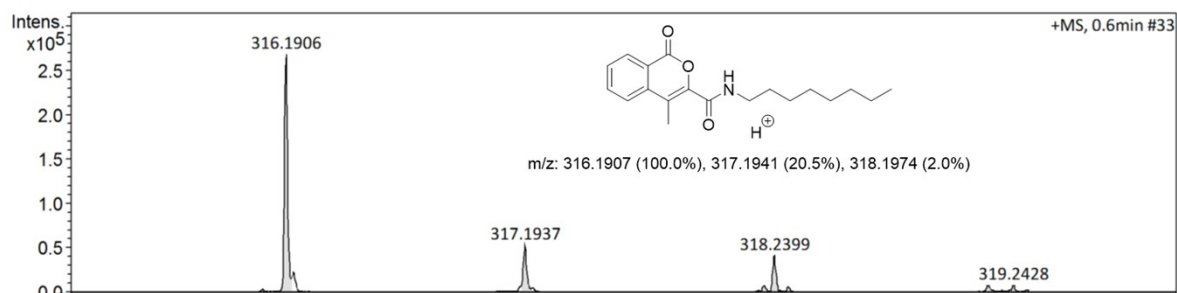

### Display Report

| Meas. m/z | # | Ion Formula                                     | m/z      | err [ppm] | mSigma | # Sigma | Score  | rdb | e <sup>-</sup> Conf | N-Rule | Adduct |
|-----------|---|-------------------------------------------------|----------|-----------|--------|---------|--------|-----|---------------------|--------|--------|
| 316.1906  | 1 | C <sub>19</sub> H <sub>26</sub> NO <sub>3</sub> | 316.1907 | -0.4      | 8.0    | 1       | 100.00 | 7.5 | even                | ok     | M+H    |

HRMS Mass (ESI) spectrum of compound **3p**

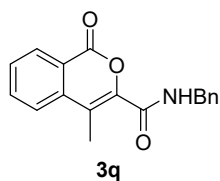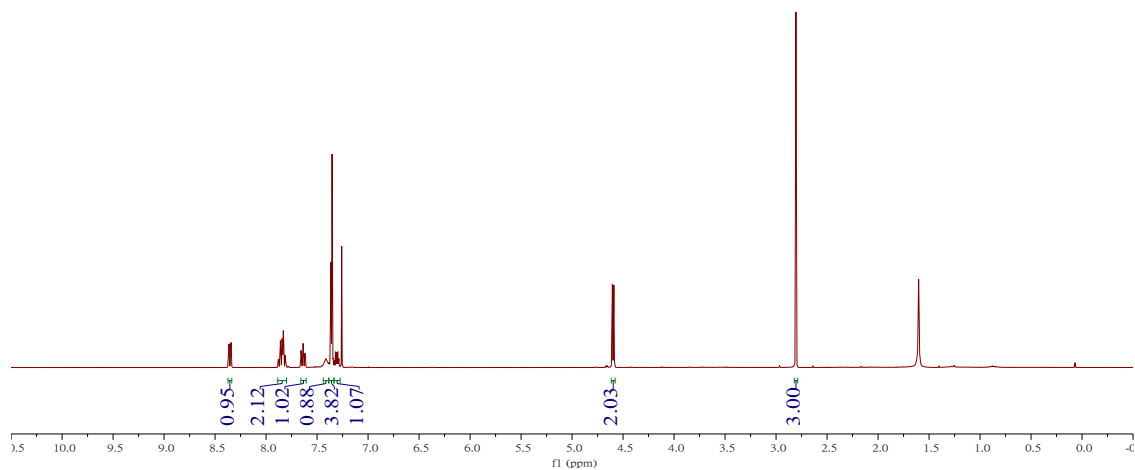

$^1\text{H}$  spectrum (400 MHz) of compound **3q** in  $\text{CDCl}_3$

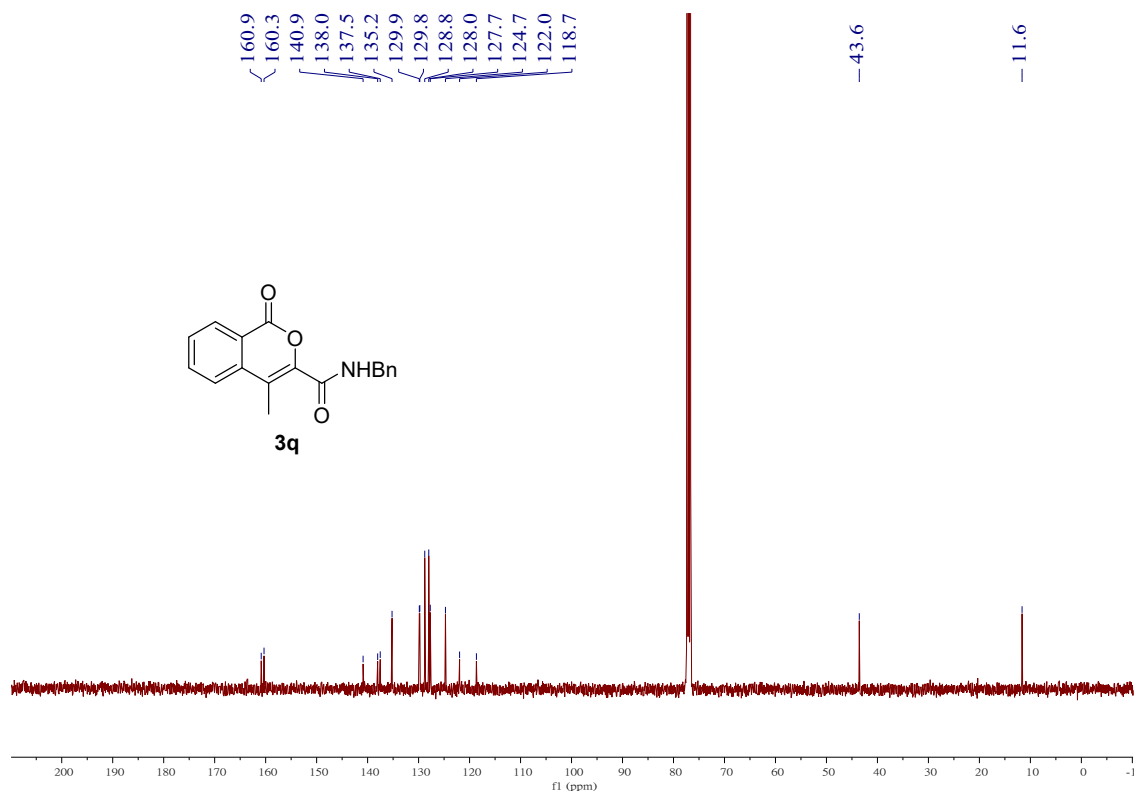

<sup>13</sup>C{<sup>1</sup>H} spectrum (101 MHz) of compound **3q** in CDCl<sub>3</sub>

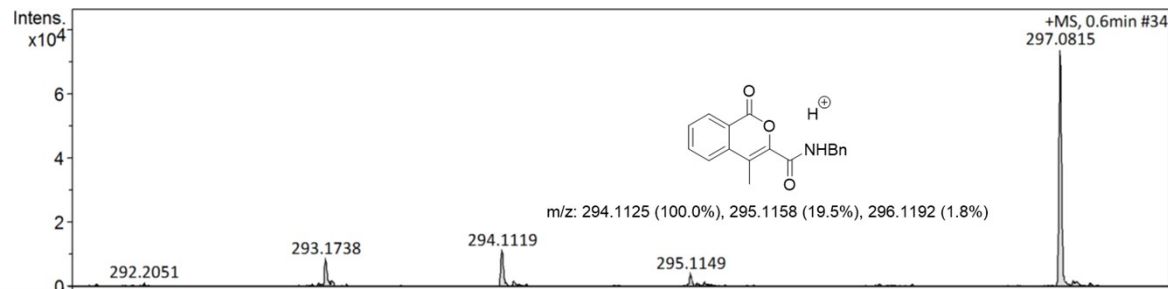

### Display Report

| Meas. m/z | # | Ion Formula                                     | m/z      | err [ppm] | mSigma | # Sigma | Score  | rdb  | e <sup>-</sup> Conf | N-Rule | Adduct |
|-----------|---|-------------------------------------------------|----------|-----------|--------|---------|--------|------|---------------------|--------|--------|
| 294.1119  | 1 | C <sub>18</sub> H <sub>16</sub> NO <sub>3</sub> | 294.1125 | 1.9       | 82.5   | 1       | 100.00 | 11.5 | even                | ok     | M+H    |

HRMS Mass (ESI) spectrum of compound **3q**

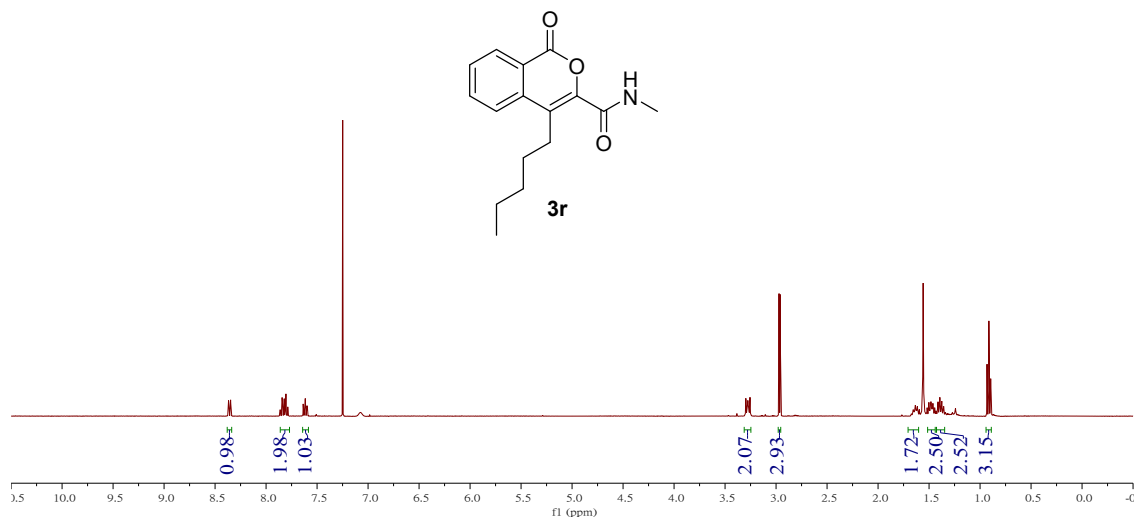

<sup>1</sup>H spectrum (400 MHz) of compound **3r** in CDCl<sub>3</sub>

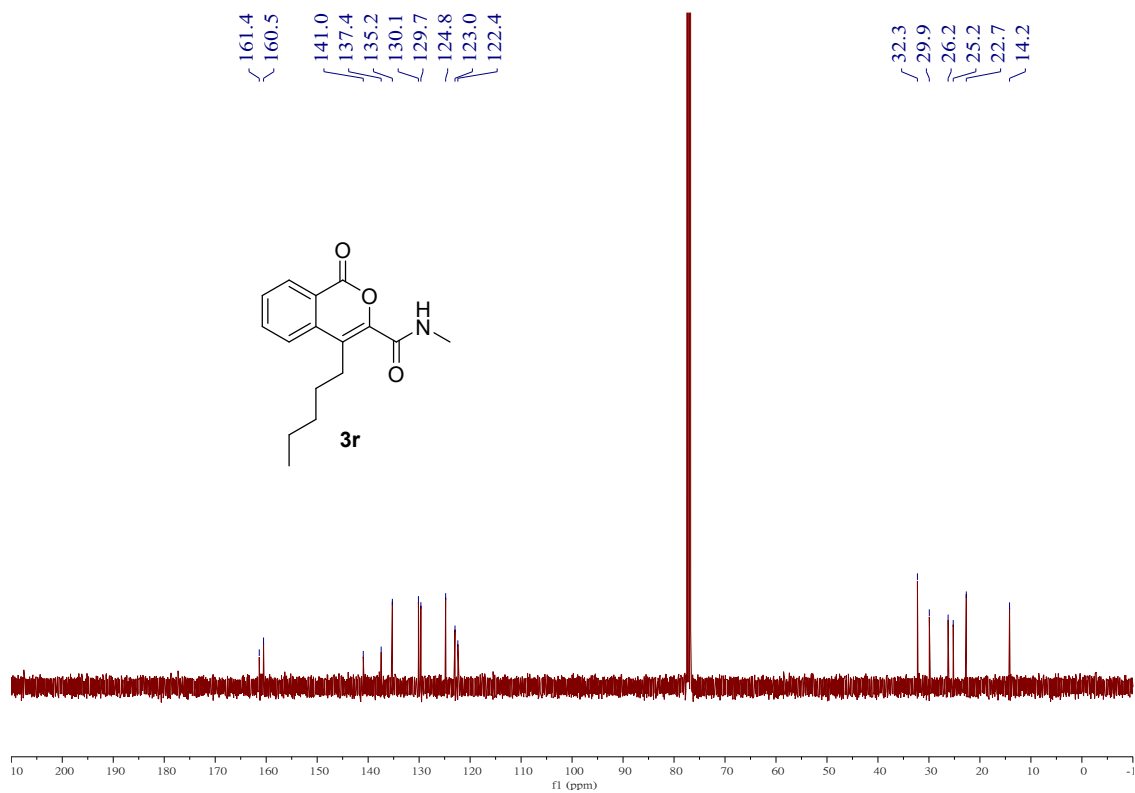

$^{13}\text{C}\{^1\text{H}\}$  spectrum (101 MHz) of compound **3r** in  $\text{CDCl}_3$

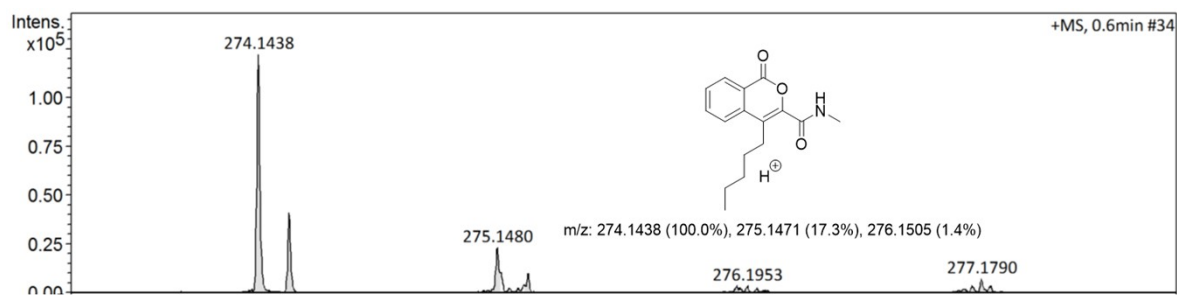

### Display Report

| Meas. m/z | # | Ion Formula                                     | m/z      | err [ppm] | mSigma | # Sigma | Score  | rdb | e <sup>-</sup> Conf | N-Rule | Adduct |
|-----------|---|-------------------------------------------------|----------|-----------|--------|---------|--------|-----|---------------------|--------|--------|
| 274.1438  | 1 | C <sub>16</sub> H <sub>20</sub> NO <sub>3</sub> | 274.1438 | 0.2       | 6.0    | 1       | 100.00 | 7.5 | even                | ok     | M+H    |

HRMS Mass (ESI) spectrum of compound **3r**

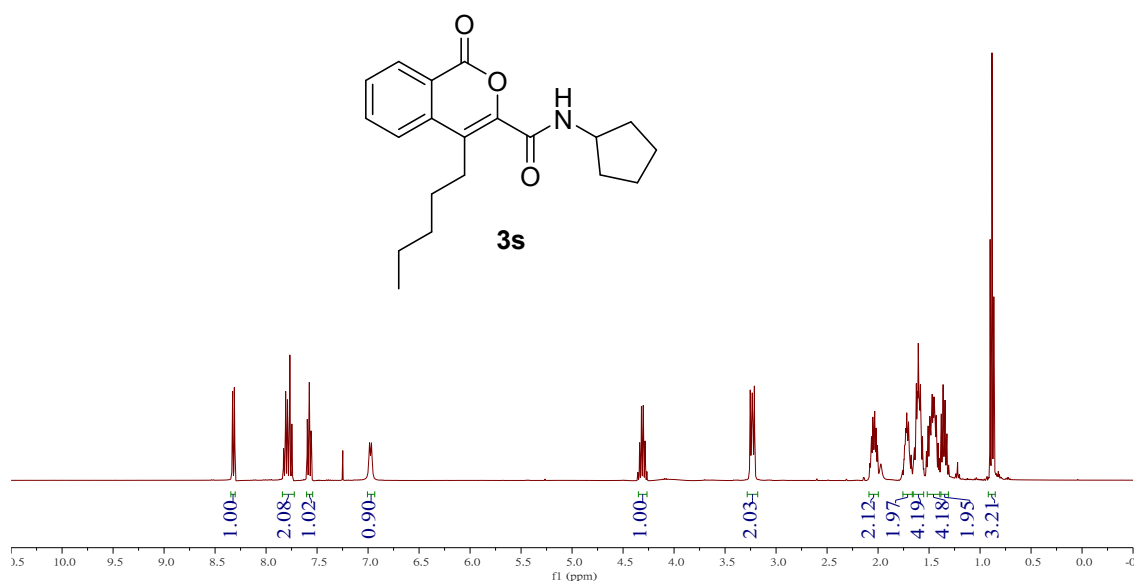

$^1\text{H}$  spectrum (400 MHz) of compound **3s** in  $\text{CDCl}_3$

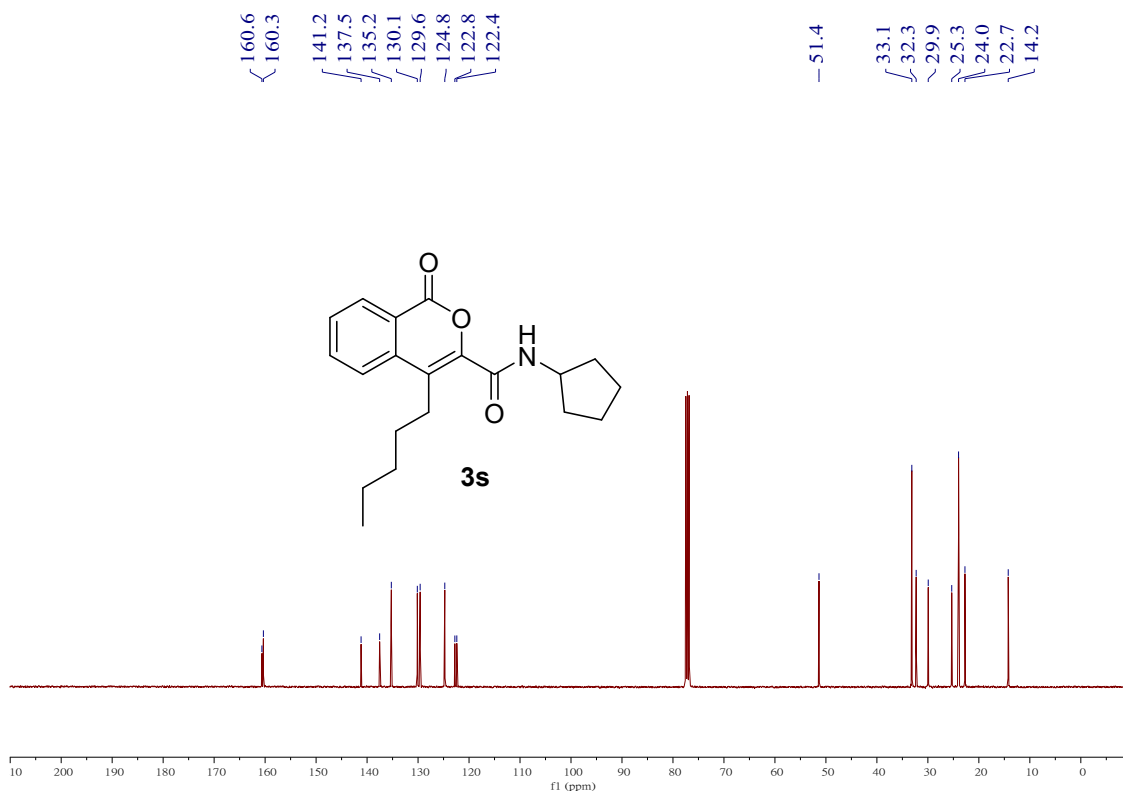

$^{13}\text{C}\{^1\text{H}\}$  spectrum (101 MHz) of compound **3s** in  $\text{CDCl}_3$

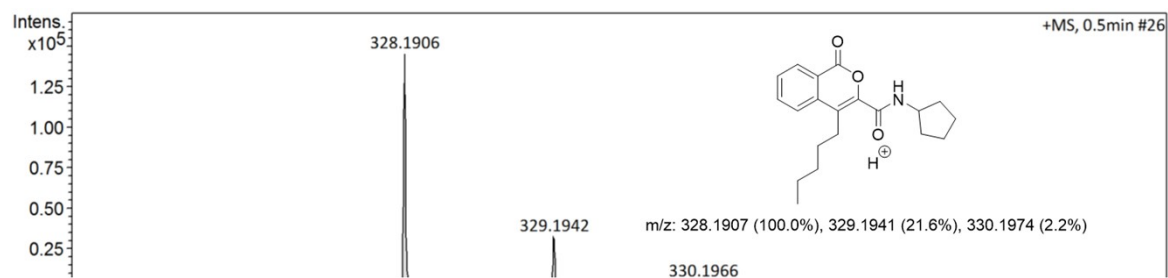

### Display Report

| Meas. m/z | # | Ion Formula                                     | m/z      | err [ppm] | mSigma | # Sigma | Score  | rdb | e <sup>-</sup> Conf | N-Rule | Adduct |
|-----------|---|-------------------------------------------------|----------|-----------|--------|---------|--------|-----|---------------------|--------|--------|
| 328.1906  | 1 | C <sub>20</sub> H <sub>26</sub> NO <sub>3</sub> | 328.1907 | 0.3       | 2.1    | 1       | 100.00 | 8.5 | even                | ok     | M+H    |

HRMS Mass (ESI) spectrum of compound **3s**

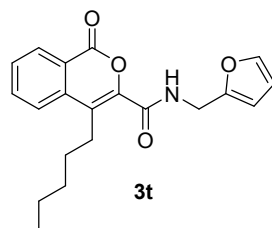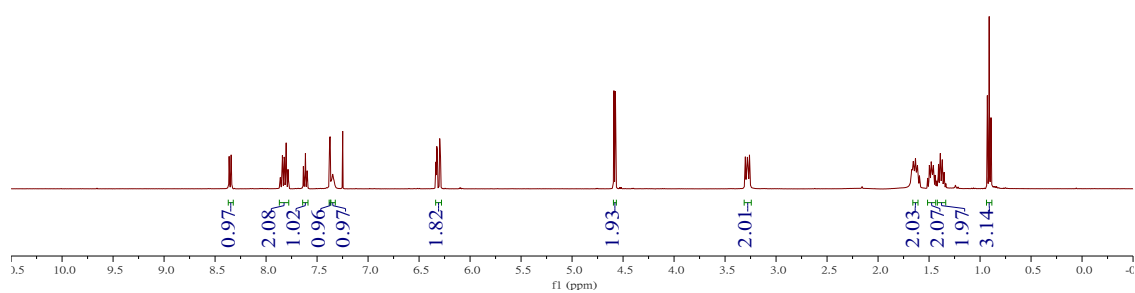

$^1\text{H}$  spectrum (400 MHz) of compound **3t** in  $\text{CDCl}_3$

165.2  
161.8  
156.7  
150.5  
142.6  
135.3  
135.1  
129.8  
128.4  
123.6  
119.8  
113.6  
110.7  
108.2

36.9  
32.0  
31.4  
27.4  
22.4  
14.0

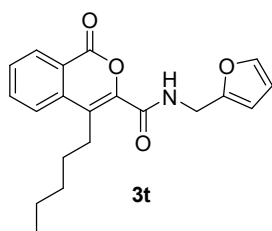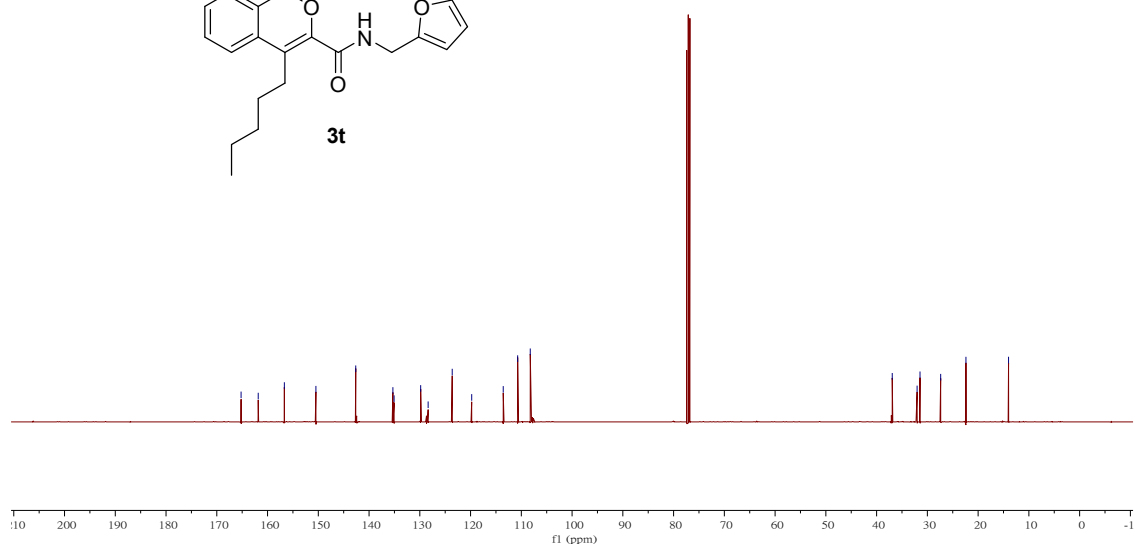



$^{13}\text{C}\{^1\text{H}\}$  spectrum (101 MHz) of compound **3t** in  $\text{CDCl}_3$

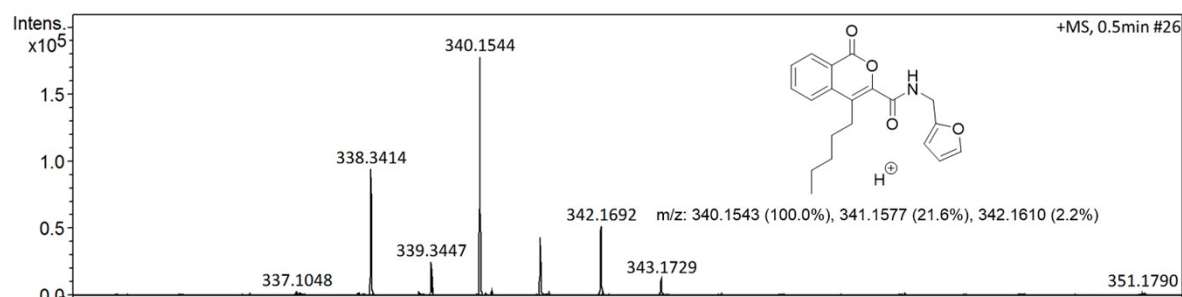

Display Report

| Meas. m/z | # | Ion Formula                                     | m/z      | err [ppm] | mSigma | # Sigma | Score  | rdb  | e <sup>-</sup> Conf | N-Rule | Adduct |
|-----------|---|-------------------------------------------------|----------|-----------|--------|---------|--------|------|---------------------|--------|--------|
| 340.1544  | 1 | C <sub>20</sub> H <sub>22</sub> NO <sub>4</sub> | 340.1543 | 0.3       | 21.8   | 1       | 100.00 | 10.5 | even                | ok     | M+H    |

HRMS Mass (ESI) spectrum of compound **3t**

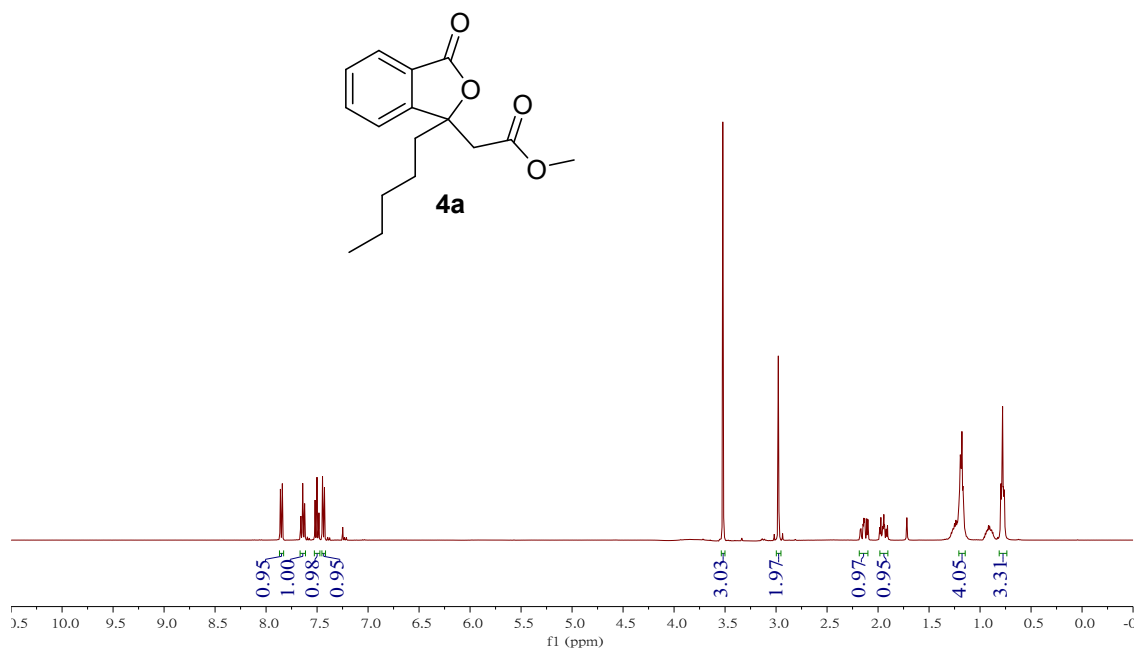

$^1\text{H}$  spectrum (400 MHz) of compound **4a** in  $\text{CDCl}_3$

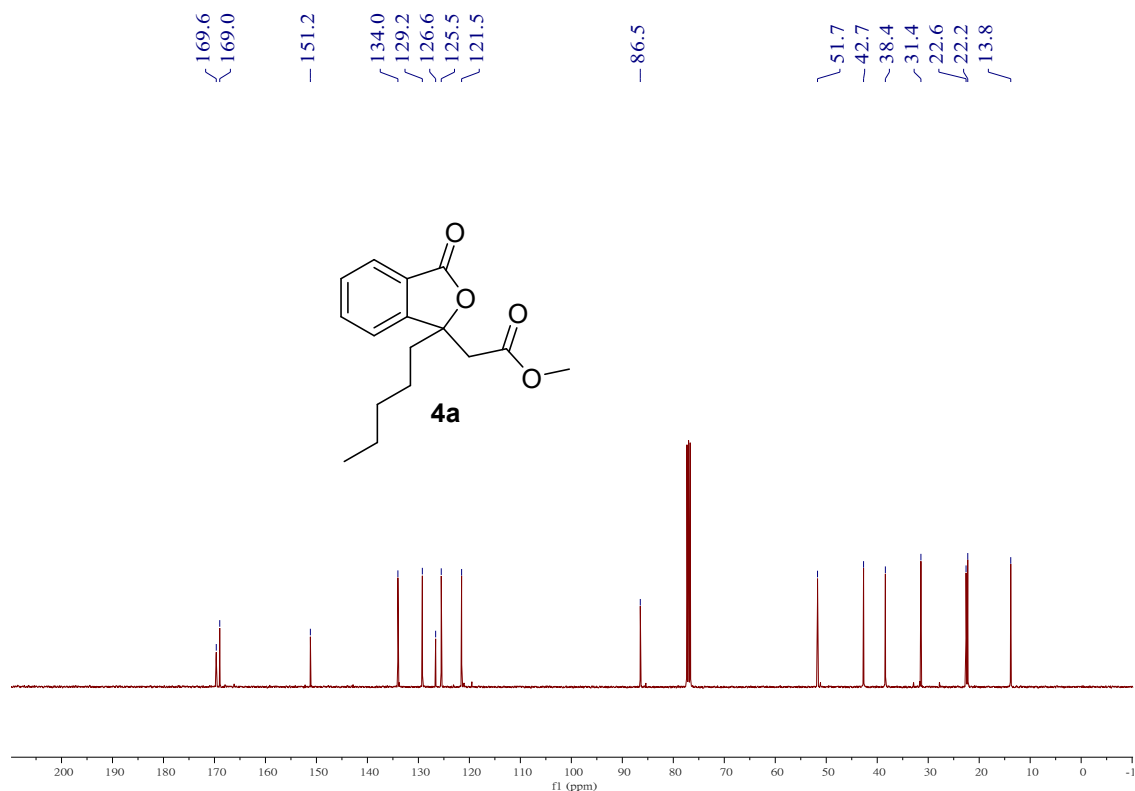

$^{13}\text{C}\{^1\text{H}\}$  spectrum (101 MHz) of compound **4a** in  $\text{CDCl}_3$

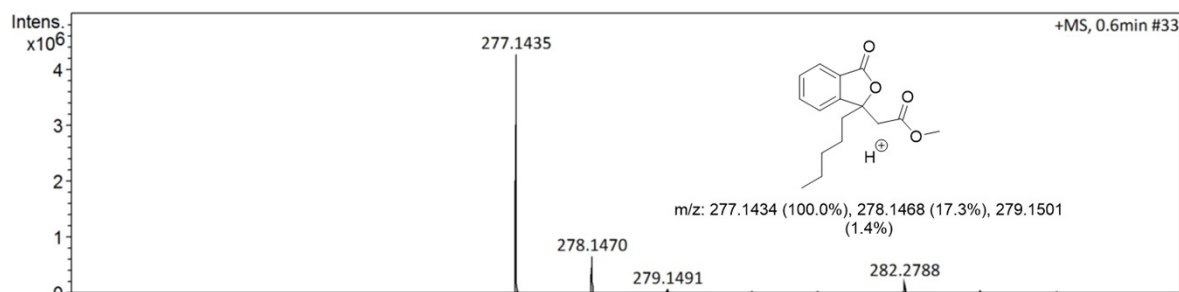

### Display Report

| Meas. m/z | # | Ion Formula                                    | m/z      | err [ppm] | mSigma | # Sigma | Score  | rdb | e <sup>-</sup> Conf | N-Rule | Adduct |
|-----------|---|------------------------------------------------|----------|-----------|--------|---------|--------|-----|---------------------|--------|--------|
| 277.1435  | 1 | C <sub>16</sub> H <sub>21</sub> O <sub>4</sub> | 277.1434 | -0.2      | 14.1   | 1       | 100.00 | 6.5 | even                | ok     | M+H    |

HRMS Mass (ESI) spectrum of compound **4a**

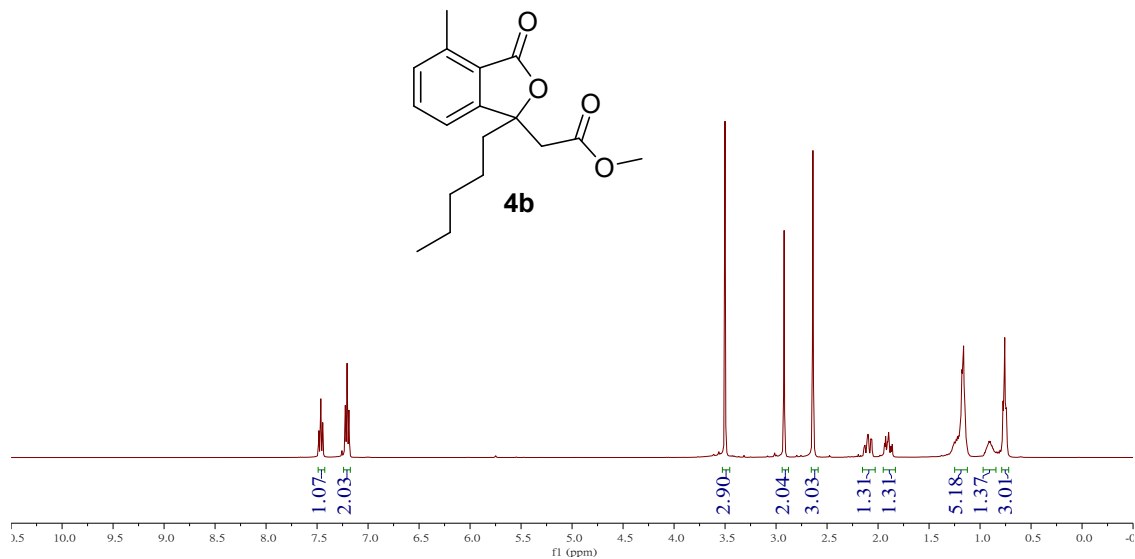

<sup>1</sup>H spectrum (400 MHz) of compound **4b** in CDCl<sub>3</sub>

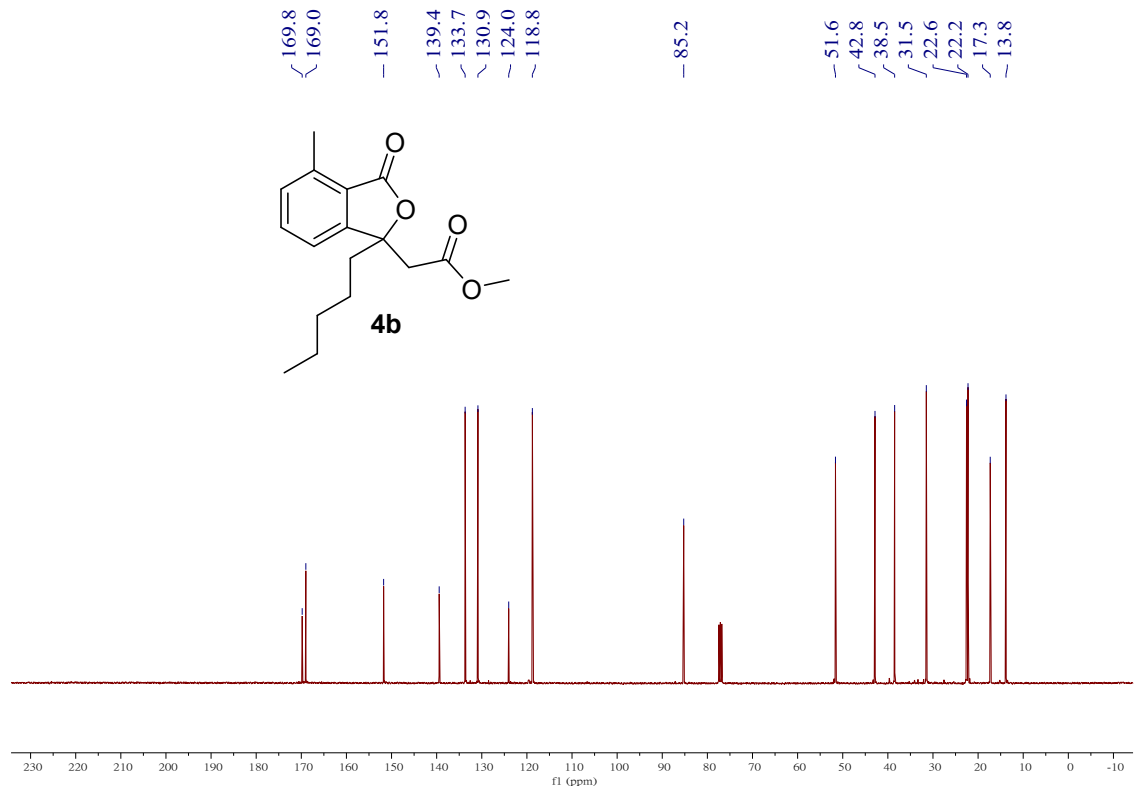

$^{13}\text{C}\{^1\text{H}\}$  spectrum (101 MHz) of compound **4b** in  $\text{CDCl}_3$

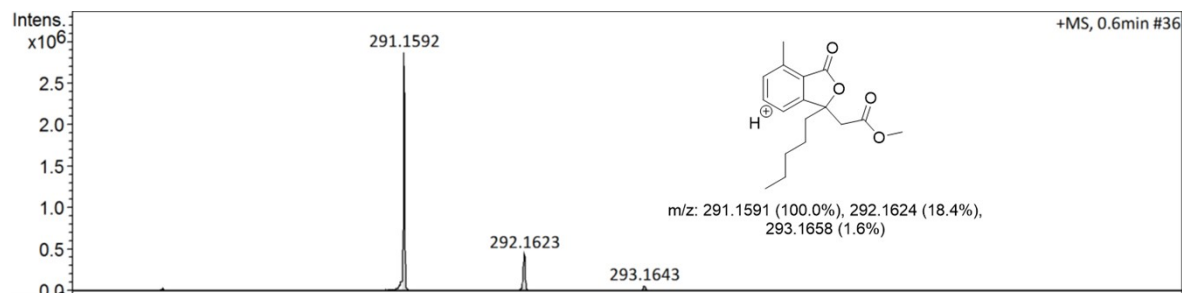

Display Report

| Meas. m/z | # | Ion Formula | m/z      | err [ppm] | mSigma | # Sigma | Score  | rdb | e <sup>-</sup> Conf | N-Rule | Adduct |
|-----------|---|-------------|----------|-----------|--------|---------|--------|-----|---------------------|--------|--------|
| 291.1592  | 1 | C17H23O4    | 291.1591 | -0.5      | 18.7   | 2       | 100.00 | 6.5 | even                | ok     | M+H    |

HRMS Mass (ESI) spectrum of compound **4b**

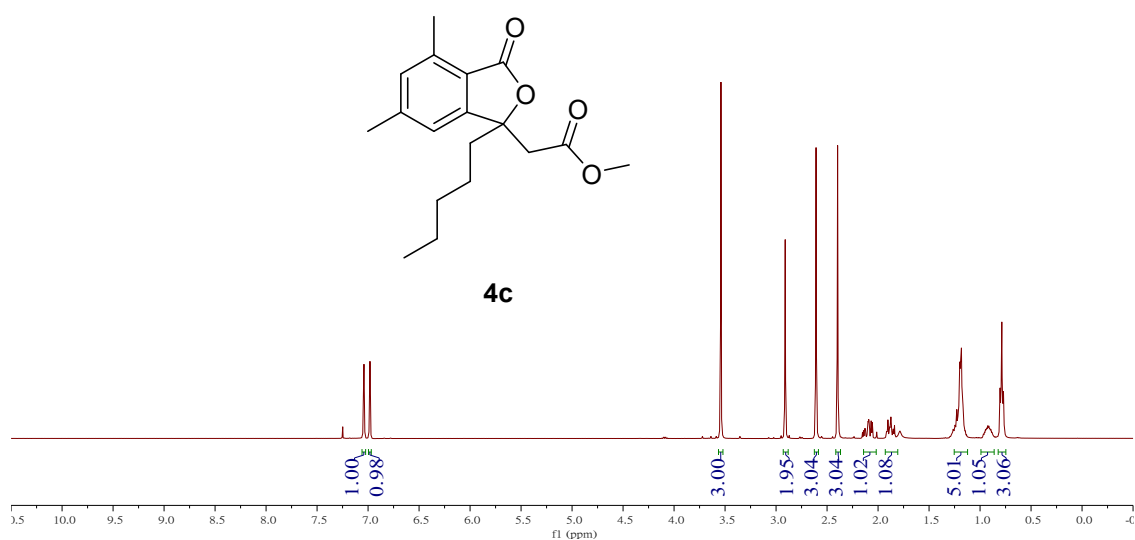

$^1\text{H}$  spectrum (400 MHz) of compound **4c** in  $\text{CDCl}_3$

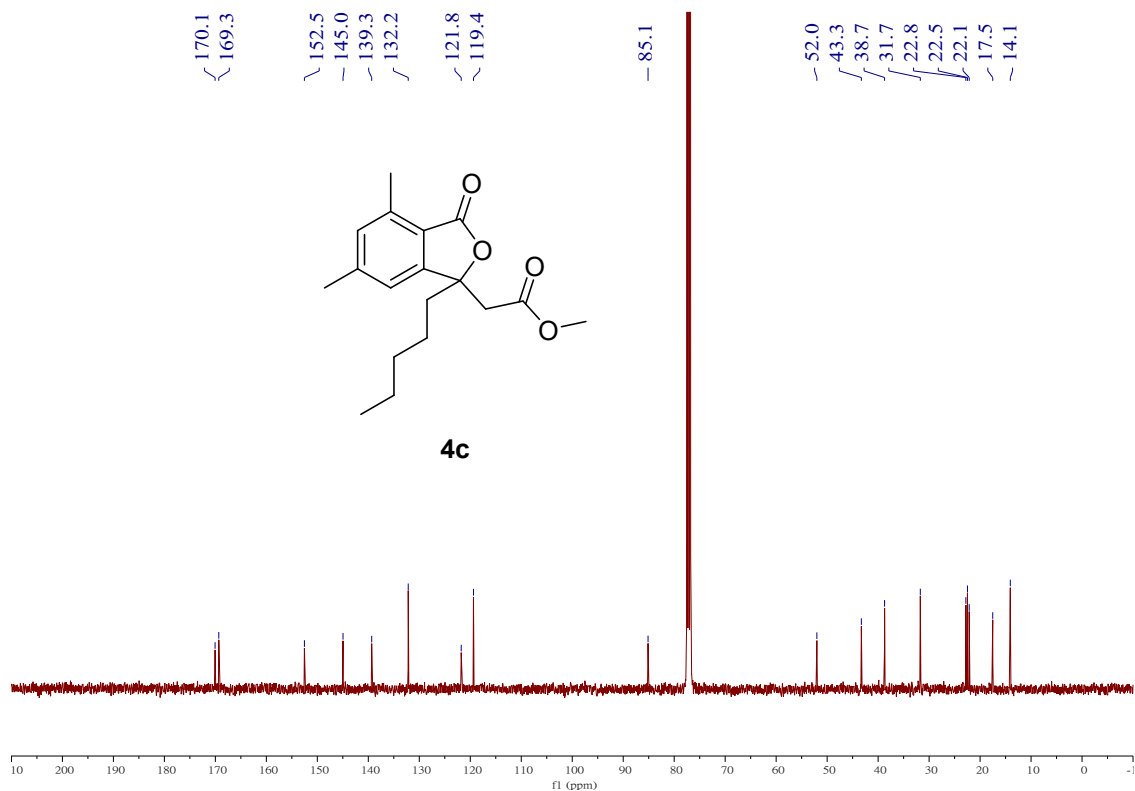

$^{13}\text{C}\{^1\text{H}\}$  spectrum (101 MHz) of compound **4c** in  $\text{CDCl}_3$

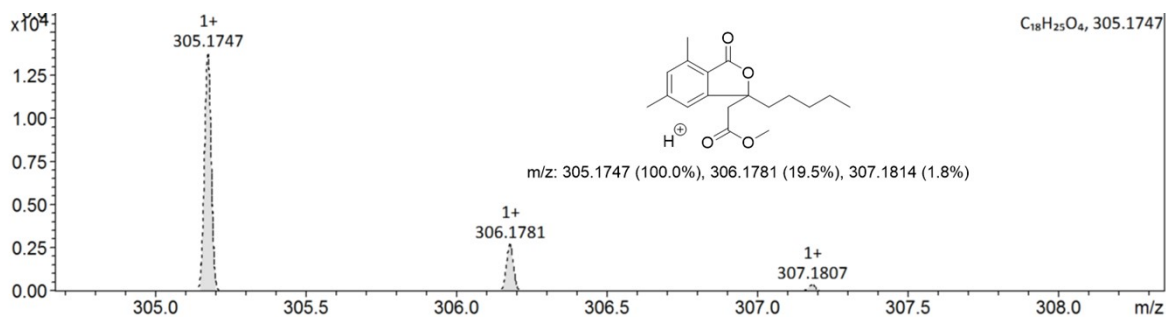

### Display Report

| Meas. m/z | # | Ion Formula                                    | m/z      | err [ppm] | mSigma | # Sigma | Score | rdb | e <sup>-</sup> Conf | N-Rule | Adduct |
|-----------|---|------------------------------------------------|----------|-----------|--------|---------|-------|-----|---------------------|--------|--------|
| 305.1731  | 1 | C <sub>18</sub> H <sub>25</sub> O <sub>4</sub> | 305.1747 | -5.3      | n.a.   | 1       | -1.#J | 6.5 | even                | ok     | M+H    |

HRMS Mass (ESI) spectrum of compound **4c**

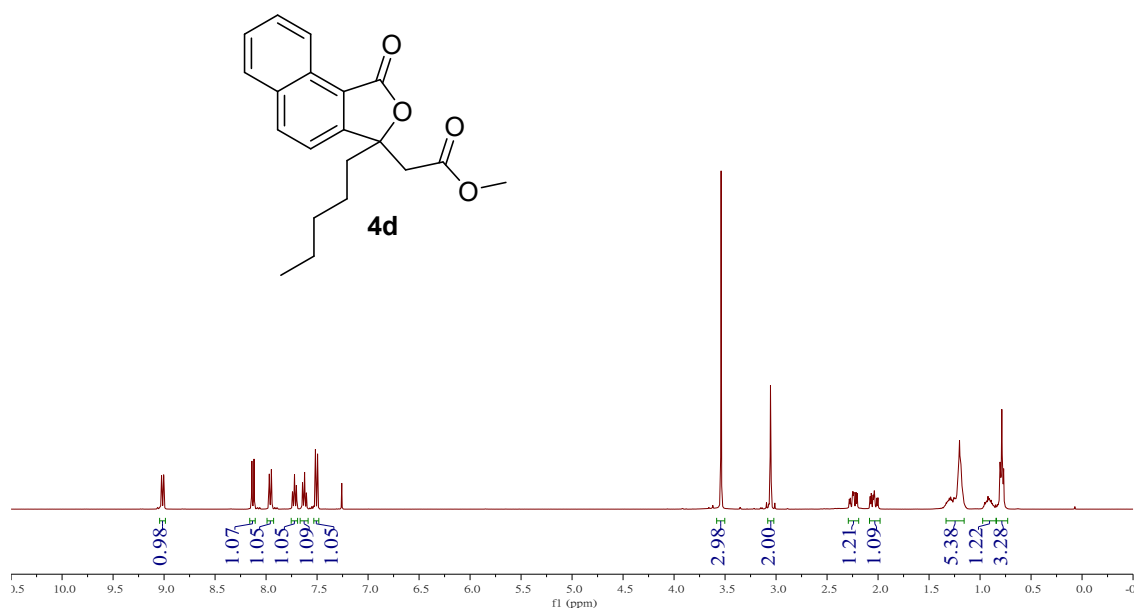

$^{13}\text{C}$  NMR spectrum (100 MHz) of compound **4d** in  $\text{CDCl}_3$

| Chemical Shift (ppm) |
|----------------------|
| 170.1                |
| 169.2                |
| 152.9                |
| 135.7                |
| 133.5                |
| 129.2                |
| 129.2                |
| 128.5                |
| 127.4                |
| 123.8                |
| 120.8                |
| 118.4                |
| -85.7                |
| 52.0                 |
| 42.9                 |
| 38.1                 |
| 31.6                 |
| 22.8                 |
| 22.4                 |
| 14.0                 |

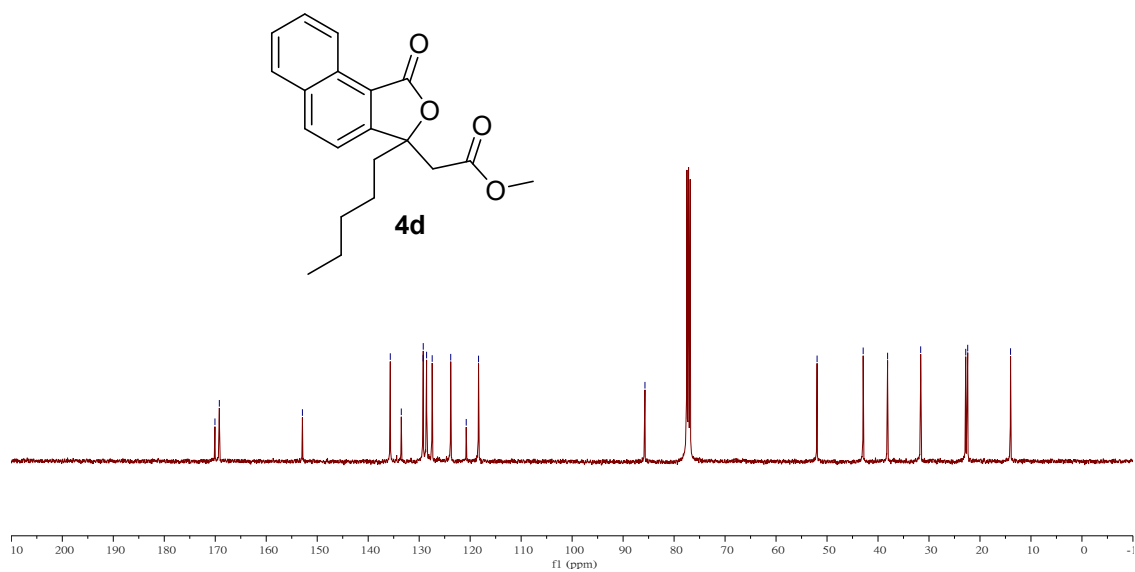

$^{13}\text{C}\{^1\text{H}\}$  spectrum (101 MHz) of compound **4d** in  $\text{CDCl}_3$

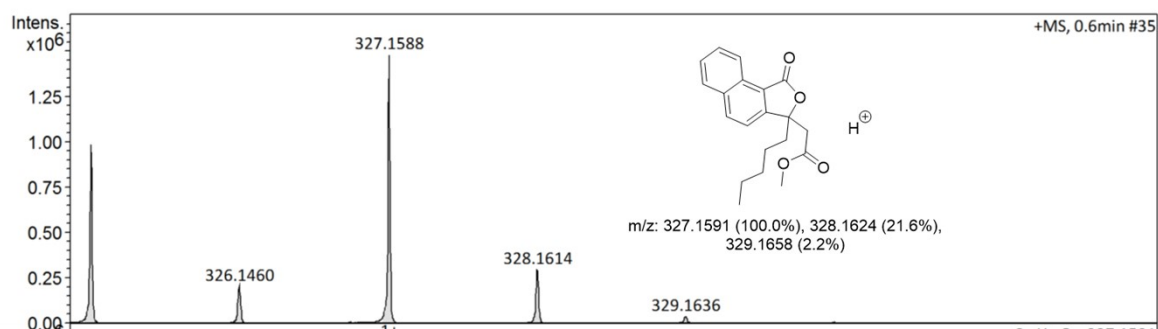

### Display Report

| Meas. $m/z$ | # | Ion Formula                            | $m/z$    | err [ppm] | mSigma | # Sigma | Score  | rdb | $e^-$ Conf | N-Rule | Adduct |
|-------------|---|----------------------------------------|----------|-----------|--------|---------|--------|-----|------------|--------|--------|
| 327.1588    | 1 | $\text{C}_{20}\text{H}_{23}\text{O}_4$ | 327.1591 | 0.9       | 11.7   | 1       | 100.00 | 9.5 | even       | ok     | M+H    |

HRMS Mass (ESI) spectrum of compound **4d**

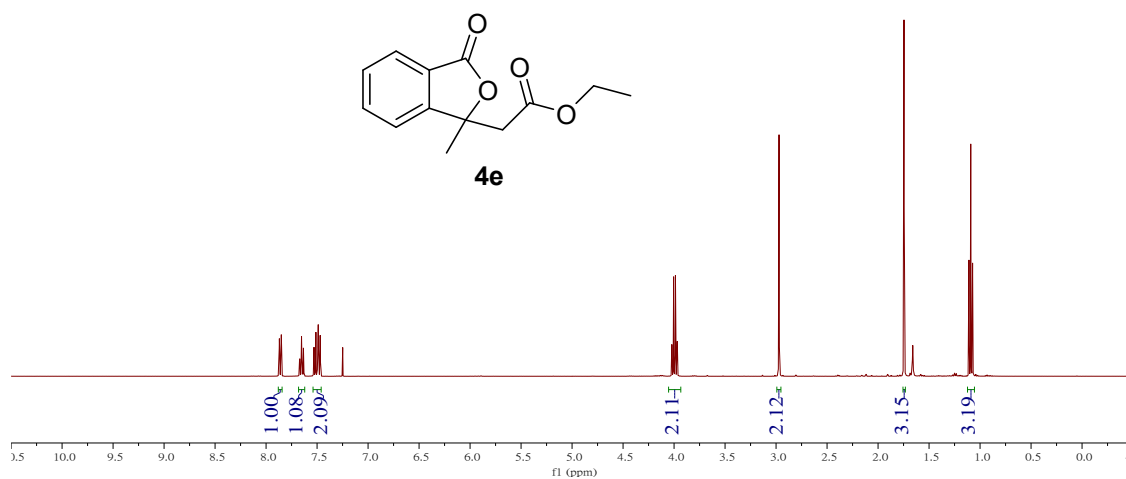

$^1\text{H}$  spectrum (400 MHz) of compound **4e** in  $\text{CDCl}_3$

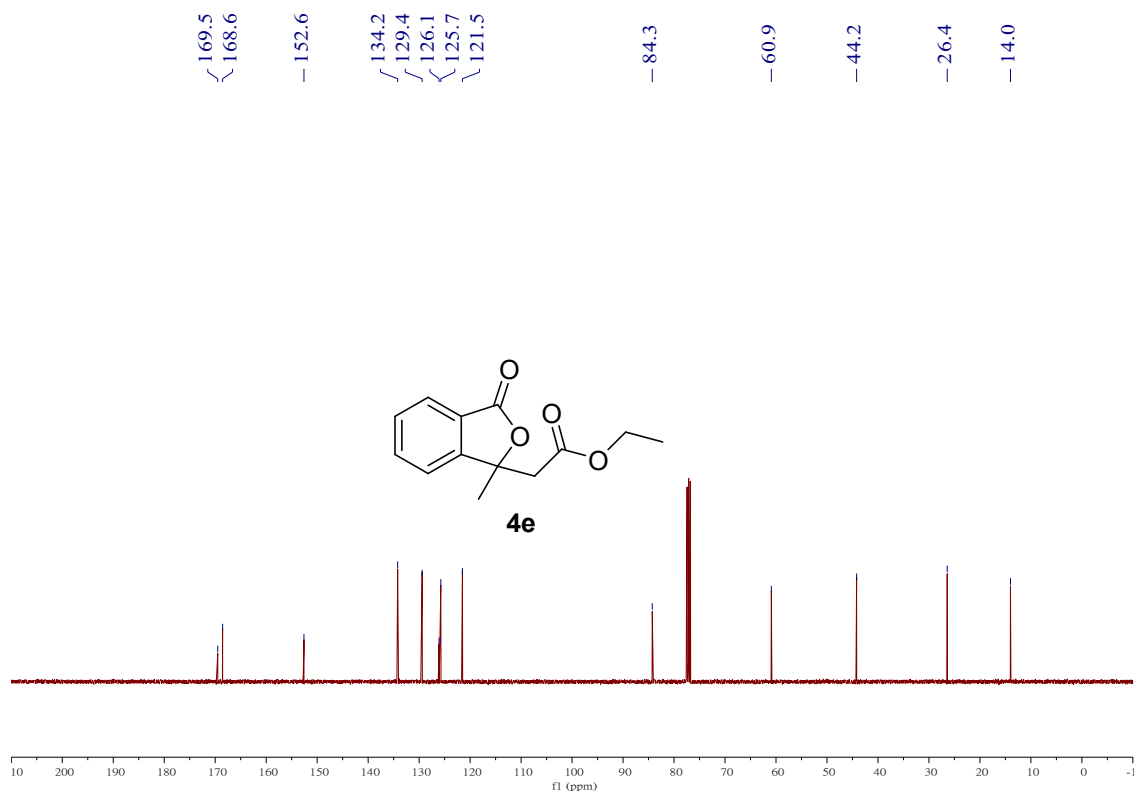

$^{13}\text{C}\{^1\text{H}\}$  spectrum (101 MHz) of compound **4e** in  $\text{CDCl}_3$

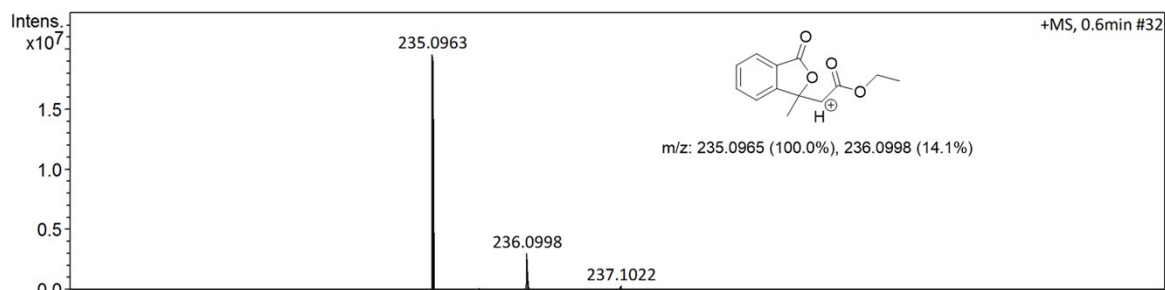

### Display Report

| Meas. m/z | # | Ion Formula                                    | m/z      | err [ppm] | mSigma | # Sigma | Score  | rdb | e <sup>-</sup> Conf | N-Rule | Adduct |
|-----------|---|------------------------------------------------|----------|-----------|--------|---------|--------|-----|---------------------|--------|--------|
| 235.0963  | 1 | C <sub>13</sub> H <sub>15</sub> O <sub>4</sub> | 235.0965 | -0.6      | 6.4    | 1       | 100.00 | 6.5 | even                | ok     | M+H    |

HRMS Mass (ESI) spectrum of compound **4e**



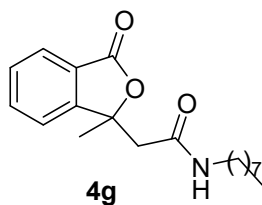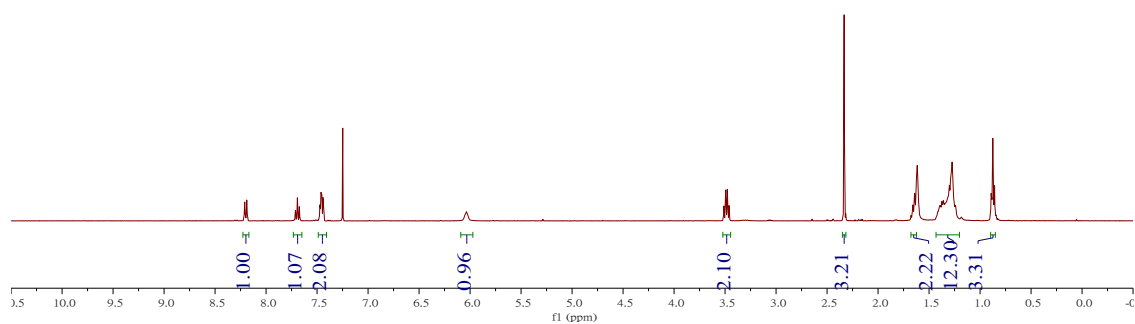

<sup>1</sup>H spectrum (400 MHz) of compound **4g** in CDCl<sub>3</sub>

Chemical shift values (ppm) for the <sup>13</sup>C NMR spectrum of compound **4g**:

- 165.4, 161.7, 152.7
- 135.3, 129.8, 128.3, 123.5, 119.7, 114.3
- 40.2, 31.8, 29.6, 29.3, 29.3, 27.1, 22.7, 18.2, 14.2

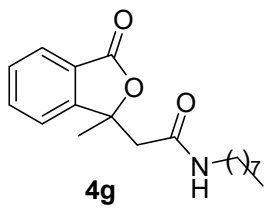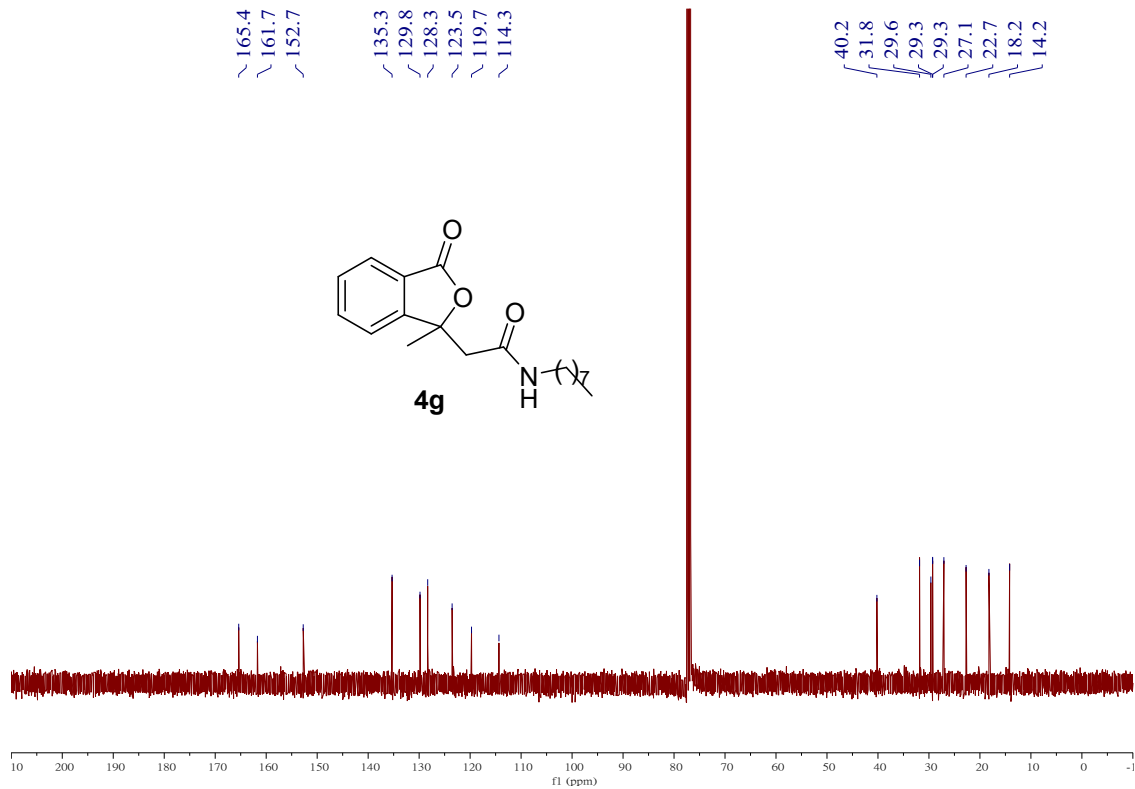

$^{13}\text{C}\{^1\text{H}\}$  spectrum (101 MHz) of compound **4g** in  $\text{CDCl}_3$

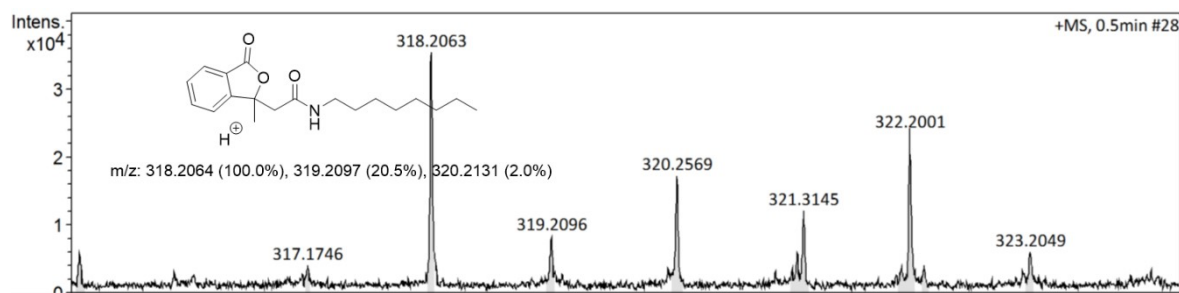

### Display Report

| Meas. m/z | # | Ion Formula                                     | m/z      | err [ppm] | mSigma | # Sigma | Score  | rdb | e <sup>-</sup> Conf | N-Rule | Adduct |
|-----------|---|-------------------------------------------------|----------|-----------|--------|---------|--------|-----|---------------------|--------|--------|
| 318.2063  | 1 | C <sub>19</sub> H <sub>28</sub> NO <sub>3</sub> | 318.2064 | 0.2       | 21.8   | 1       | 100.00 | 6.5 | even                | ok     | M+H    |

HRMS Mass (ESI) spectrum of compound **4g**

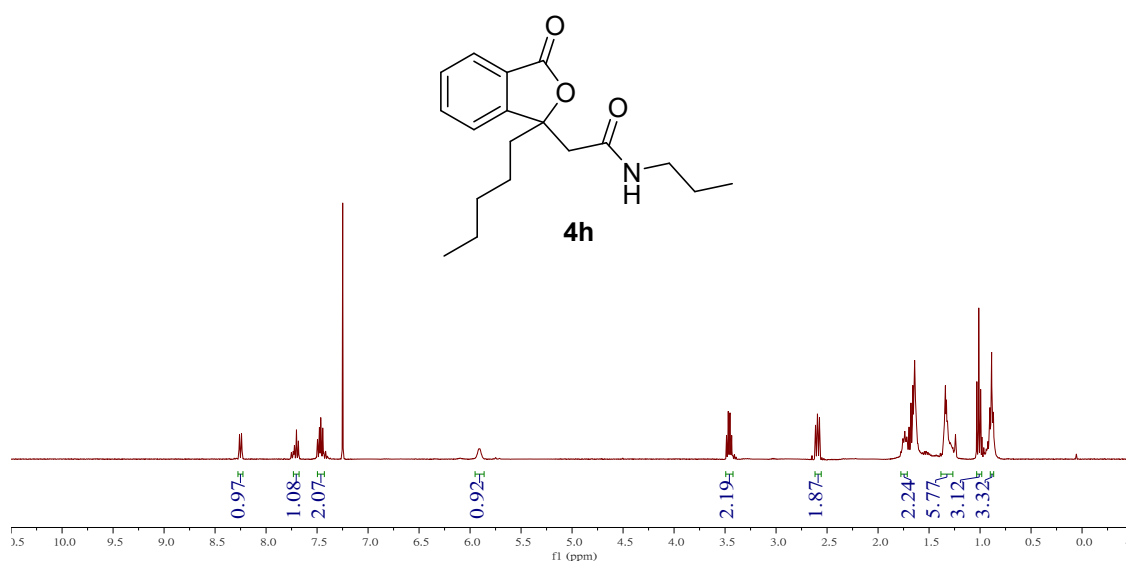

$^1\text{H}$  spectrum (400 MHz) of compound **4h** in  $\text{CDCl}_3$

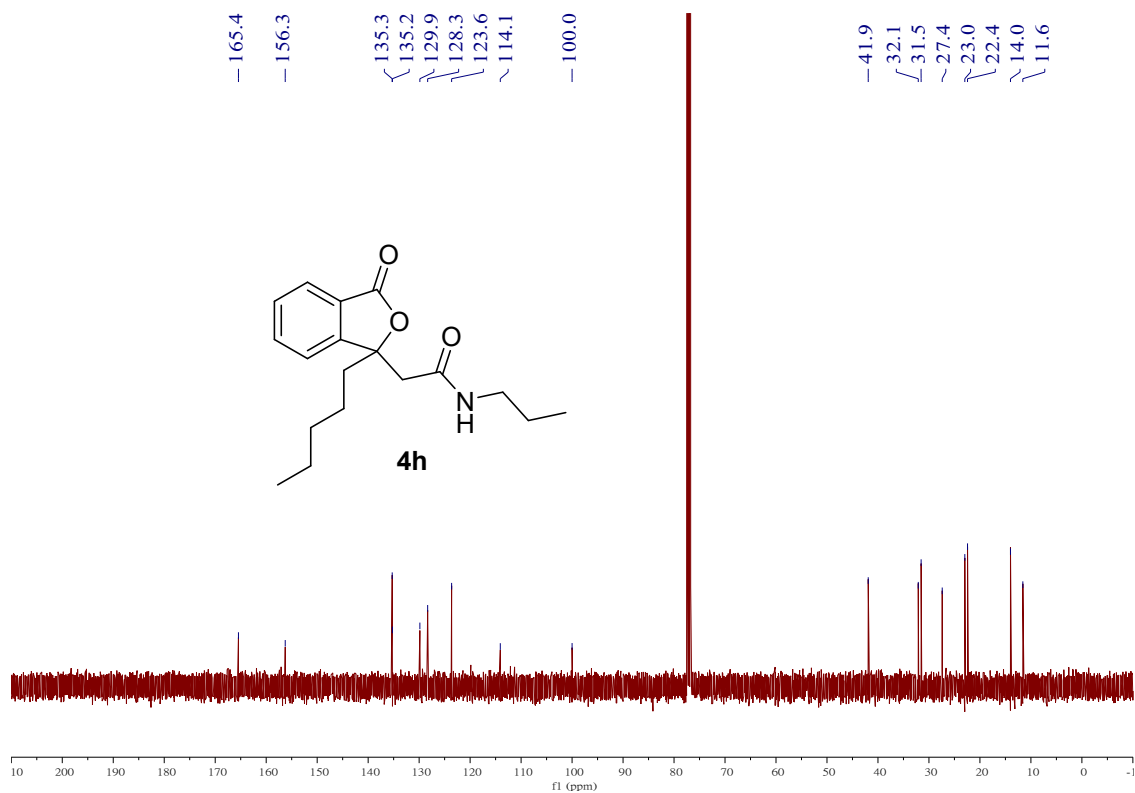

<sup>13</sup>C{<sup>1</sup>H} spectrum (101 MHz) of compound **4h** in CDCl<sub>3</sub>

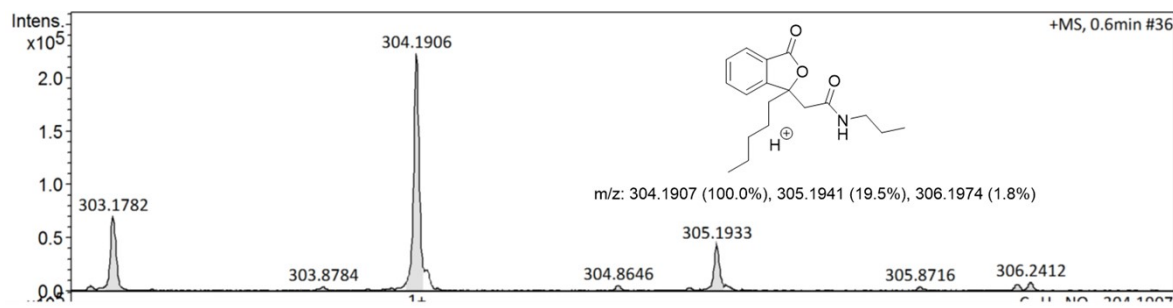

### Display Report

| Meas. m/z | # | Ion Formula                                     | m/z      | err [ppm] | mSigma | # Sigma | Score  | rdb | e <sup>-</sup> Conf | N-Rule | Adduct |
|-----------|---|-------------------------------------------------|----------|-----------|--------|---------|--------|-----|---------------------|--------|--------|
| 304.1906  | 1 | C <sub>18</sub> H <sub>26</sub> NO <sub>3</sub> | 304.1907 | -0.3      | 3.9    | 1       | 100.00 | 6.5 | even                | ok     | M+H    |

HRMS Mass (ESI) spectrum of compound **4h**

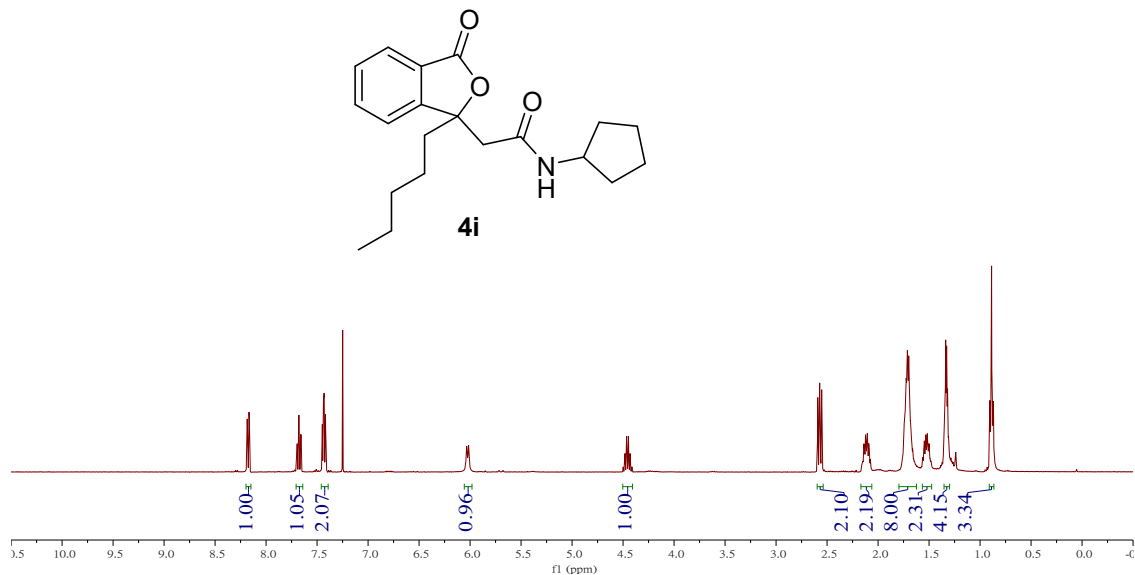

$^1\text{H}$  spectrum (400 MHz) of compound **4i** in  $\text{CDCl}_3$

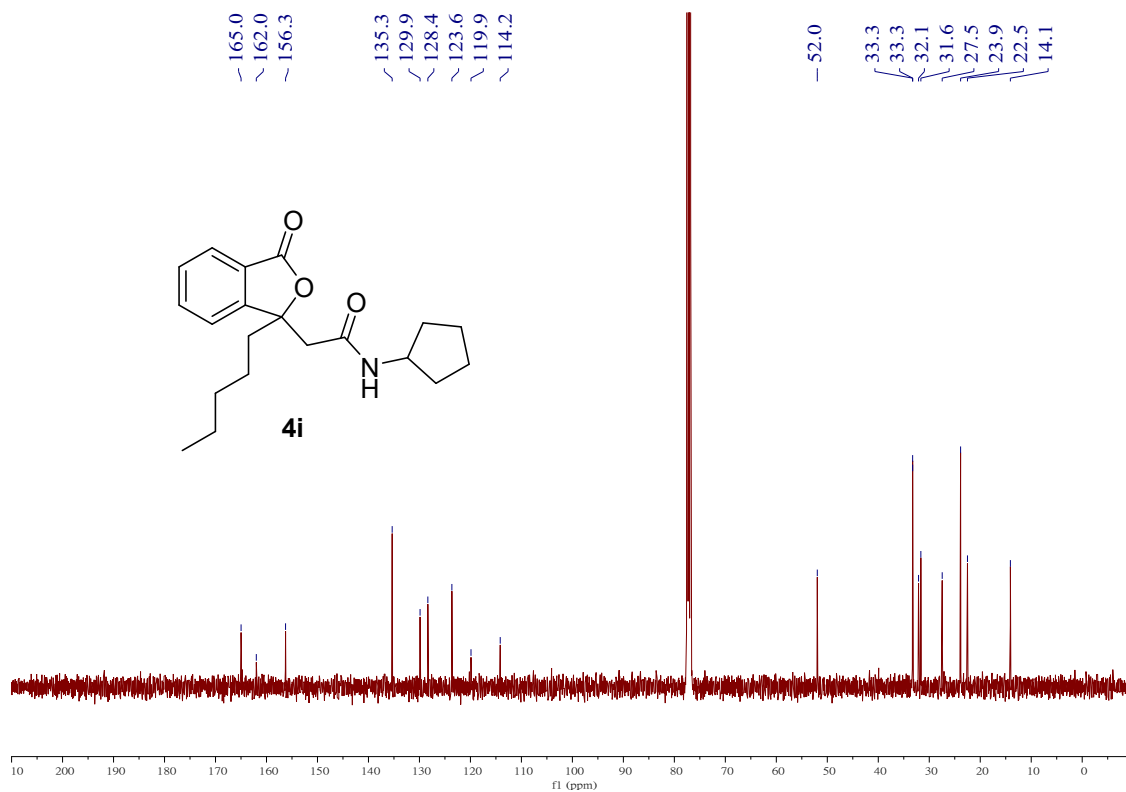

$^{13}\text{C}\{^1\text{H}\}$  spectrum (101 MHz) of compound **4i** in  $\text{CDCl}_3$

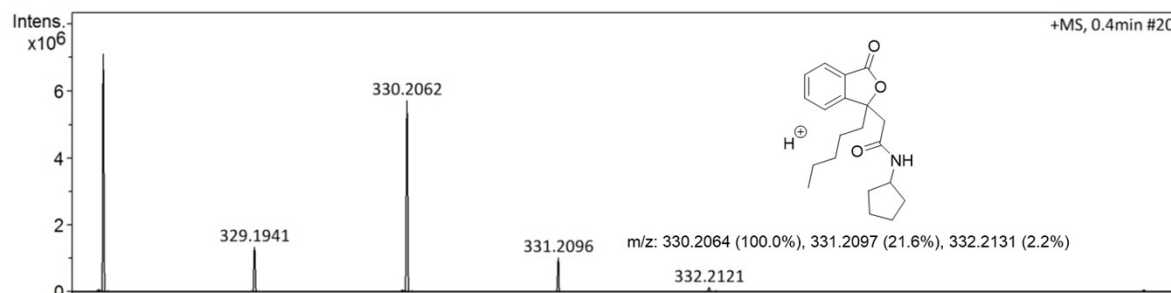

Display Report

| Meas. m/z | # | Ion Formula                                     | m/z      | err [ppm] | mSigma | # Sigma | Score  | rdb | e <sup>-</sup> Conf | N-Rule | Adduct |
|-----------|---|-------------------------------------------------|----------|-----------|--------|---------|--------|-----|---------------------|--------|--------|
| 330.2062  | 1 | C <sub>20</sub> H <sub>28</sub> NO <sub>3</sub> | 330.2064 | -0.5      | 25.6   | 1       | 100.00 | 7.5 | even                | ok     | M+H    |

HRMS Mass (ESI) spectrum of compound **4i**

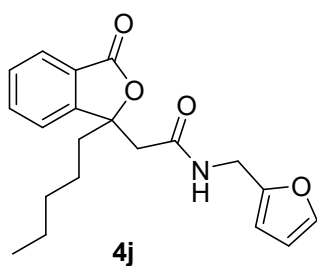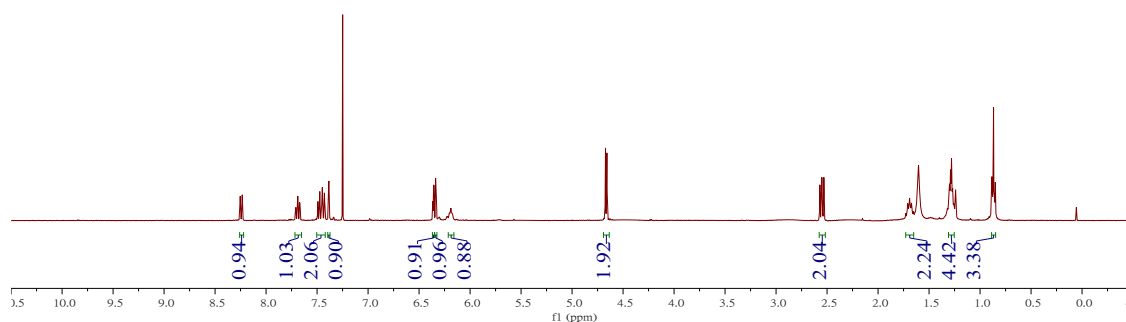

$^1\text{H}$  spectrum (400 MHz) of compound **4j** in  $\text{CDCl}_3$



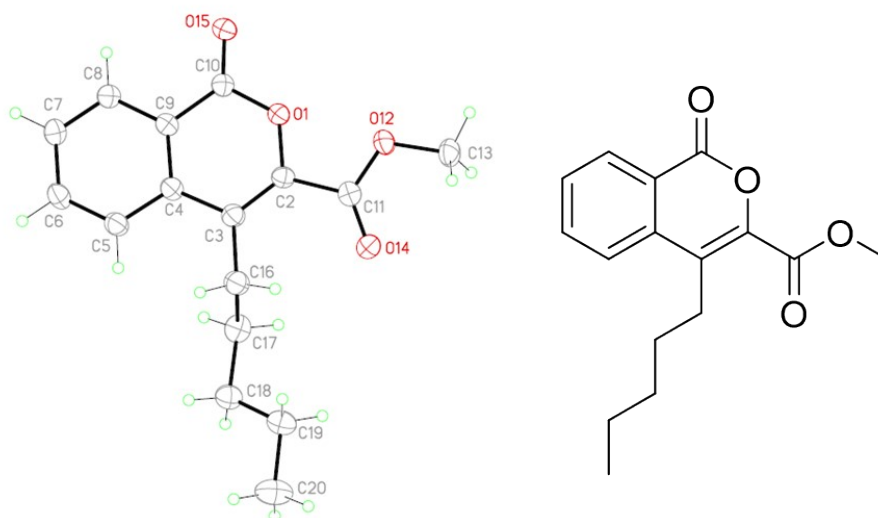

CCDC 2323184

### X-ray single crystallographic data of the compounds 3a

**Table S1 Crystal data and structure refinement for 230653lt\_auto.**

|                                    |                                                |
|------------------------------------|------------------------------------------------|
| Identification code                | 230653lt_auto                                  |
| Empirical formula                  | C <sub>16</sub> H <sub>18</sub> O <sub>4</sub> |
| Formula weight                     | 274.30                                         |
| Temperature/K                      | 99.99(10)                                      |
| Crystal system                     | monoclinic                                     |
| Space group                        | P2 <sub>1</sub> /c                             |
| a/Å                                | 11.7049(3)                                     |
| b/Å                                | 14.6860(3)                                     |
| c/Å                                | 8.72913(18)                                    |
| α/°                                | 90                                             |
| β/°                                | 110.758(2)                                     |
| γ/°                                | 90                                             |
| Volume/Å <sup>3</sup>              | 1403.13(5)                                     |
| Z                                  | 4                                              |
| ρ <sub>calc</sub> /cm <sup>3</sup> | 1.299                                          |
| μ/mm <sup>-1</sup>                 | 0.760                                          |
| F(000)                             | 584.0                                          |
| Crystal size/mm <sup>3</sup>       | 0.18 × 0.18 × 0.03                             |
| Radiation                          | Cu Kα (λ = 1.54184)                            |

|                                                  |                                                                   |
|--------------------------------------------------|-------------------------------------------------------------------|
| 2 $\Theta$ range for data collection/ $^{\circ}$ | 8.078 to 149.82                                                   |
| Index ranges                                     | $-14 \leq h \leq 13$ , $-17 \leq k \leq 18$ , $-8 \leq l \leq 10$ |
| Reflections collected                            | 9347                                                              |
| Independent reflections                          | 2744 [ $R_{\text{int}} = 0.0224$ , $R_{\text{sigma}} = 0.0244$ ]  |
| Data/restraints/parameters                       | 2744/0/184                                                        |
| Goodness-of-fit on $F^2$                         | 1.058                                                             |
| Final R indexes [ $I \geq 2\sigma(I)$ ]          | $R_1 = 0.0517$ , $wR_2 = 0.1332$                                  |
| Final R indexes [all data]                       | $R_1 = 0.0590$ , $wR_2 = 0.1386$                                  |
| Largest diff. peak/hole / $e \text{ \AA}^{-3}$   | 0.80/-0.31                                                        |

**Table S2 Fractional Atomic Coordinates ( $\times 10^4$ ) and Equivalent Isotropic Displacement Parameters ( $\text{\AA}^2 \times 10^3$ ) for 230653lt\_auto.  $U_{\text{eq}}$  is defined as 1/3 of the trace of the orthogonalised  $U_{ij}$  tensor.**

| Atom | $x$         | $y$          | $z$         | $U(\text{eq})$ |
|------|-------------|--------------|-------------|----------------|
| C2   | 2298.5 (17) | 685.6 (12)   | 5997 (2)    | 23.1 (4)       |
| C3   | 1965.6 (18) | -117.2 (13)  | 6447 (2)    | 26.7 (4)       |
| C4   | 1253.8 (17) | -737.2 (12)  | 5144 (2)    | 24.4 (4)       |
| C5   | 868.3 (19)  | -1600.0 (13) | 5458 (2)    | 28.9 (4)       |
| C6   | 145.9 (18)  | -2143.6 (13) | 4191 (2)    | 28.9 (4)       |
| C7   | -231.4 (17) | -1842.9 (13) | 2580 (2)    | 25.6 (4)       |
| C8   | 149.2 (17)  | -1005.7 (12) | 2232 (2)    | 24.2 (4)       |
| C9   | 892.4 (16)  | -457.8 (12)  | 3508 (2)    | 21.9 (4)       |
| C10  | 1253.0 (16) | 434.1 (12)   | 3103 (2)    | 23.1 (4)       |
| C11  | 2997.9 (17) | 1428.4 (13)  | 7108 (2)    | 25.1 (4)       |
| C13  | 3554.3 (19) | 2979.2 (13)  | 7246 (3)    | 31.4 (5)       |
| C16  | 2223.4 (18) | -381.3 (14)  | 8209 (2)    | 29.9 (4)       |
| C17  | 3322.8 (19) | -1015.2 (15) | 8871 (3)    | 33.5 (5)       |
| C18  | 3438 (2)    | -1426.3 (15) | 10541 (3)   | 34.9 (5)       |
| C19  | 3690 (2)    | -731.5 (15)  | 11934 (2)   | 33.5 (5)       |
| C20  | 3927 (2)    | -1181.4 (18) | 13589 (3)   | 45.8 (6)       |
| O1   | 1974.8 (12) | 951.3 (8)    | 4381.2 (15) | 24.9 (3)       |
| O12  | 2923.2 (13) | 2204.1 (9)   | 6281.9 (16) | 28.7 (3)       |
| O14  | 3548.4 (13) | 1332.9 (9)   | 8551.3 (16) | 31.5 (4)       |
| O15  | 986.2 (13)  | 757.1 (9)    | 1745.9 (16) | 30.6 (3)       |



**Table S3 Anisotropic Displacement Parameters ( $\text{\AA}^2 \times 10^3$ ) for 230653lt\_auto. The Anisotropic displacement factor exponent takes the form: -**

$$2\pi^2[h^2a^*U_{11}+2hka^*b^*U_{12}+\dots].$$

| Atom | $U_{11}$ | $U_{22}$ | $U_{33}$ | $U_{23}$ | $U_{13}$ | $U_{12}$ |
|------|----------|----------|----------|----------|----------|----------|
| C2   | 24.9(9)  | 23.6(9)  | 21.9(9)  | 0.6(7)   | 9.7(7)   | 2.0(7)   |
| C3   | 31.7(10) | 25.0(9)  | 23.6(9)  | -0.6(7)  | 10.0(8)  | -0.6(8)  |
| C4   | 29.0(10) | 22.3(9)  | 24.5(9)  | -0.8(7)  | 12.8(8)  | 0.5(7)   |
| C5   | 36.5(11) | 25.4(10) | 26.5(10) | 1.6(8)   | 13.2(8)  | -2.0(8)  |
| C6   | 37.3(11) | 21.4(9)  | 32.4(10) | -1.1(7)  | 18.0(9)  | -2.7(8)  |
| C7   | 27.8(10) | 22.1(9)  | 30.1(10) | -5.2(7)  | 14.2(8)  | 0.3(7)   |
| C8   | 27.1(9)  | 22.3(9)  | 24.5(9)  | -1.5(7)  | 10.7(7)  | 3.3(7)   |
| C9   | 22.7(9)  | 20.1(9)  | 25.1(9)  | 0.7(7)   | 11.2(7)  | 3.4(7)   |
| C10  | 23.0(9)  | 21.7(9)  | 25.1(9)  | -0.5(7)  | 9.0(7)   | 2.1(7)   |
| C11  | 24.0(9)  | 24.6(9)  | 28.5(10) | -0.9(7)  | 11.7(8)  | 0.8(7)   |
| C13  | 35.5(11) | 22.2(9)  | 35.3(11) | -6.7(8)  | 10.9(9)  | -3.5(8)  |
| C16  | 32.7(10) | 28.2(10) | 28.9(10) | 1.3(8)   | 11.2(8)  | 0.4(8)   |
| C17  | 32.1(11) | 34.4(11) | 34.8(11) | -3.5(9)  | 12.9(9)  | 0.2(9)   |
| C18  | 34.1(11) | 31.5(11) | 34.9(11) | 6.2(9)   | 7.0(9)   | 2.4(9)   |
| C19  | 34.5(11) | 34.0(11) | 33.9(11) | 7.0(9)   | 14.5(9)  | 6.4(9)   |
| C20  | 56.7(15) | 49.6(14) | 35.1(12) | 9.9(10)  | 21.2(11) | 17.2(12) |
| O1   | 29.3(7)  | 21.1(6)  | 22.6(7)  | 1.4(5)   | 7.3(5)   | -1.4(5)  |
| O12  | 36.5(8)  | 20.1(7)  | 28.3(7)  | -1.8(5)  | 10.2(6)  | -4.2(5)  |
| O14  | 32.8(7)  | 29.3(7)  | 27.4(7)  | 0.0(6)   | 4.7(6)   | -2.3(6)  |
| O15  | 37.8(8)  | 24.8(7)  | 25.6(7)  | 4.2(5)   | 6.9(6)   | -1.6(6)  |

**Table S4 Bond Lengths for 230653lt\_auto.**

| Atom Atom | Length/ $\text{\AA}$ | Atom Atom | Length/ $\text{\AA}$ |
|-----------|----------------------|-----------|----------------------|
| C2 C3     | 1.343(3)             | C9 C10    | 1.458(2)             |
| C2 C11    | 1.496(3)             | C10 O1    | 1.367(2)             |
| C2 O1     | 1.381(2)             | C10 O15   | 1.210(2)             |
| C3 C4     | 1.465(3)             | C11 O12   | 1.335(2)             |

**Table S4 Bond Lengths for 230653lt\_auto.**

| Atom | Atom | Length/Å  | Atom | Atom | Length/Å  |
|------|------|-----------|------|------|-----------|
| C3   | C16  | 1.509 (3) | C11  | O14  | 1.202 (2) |
| C4   | C5   | 1.404 (3) | C13  | O12  | 1.452 (2) |
| C4   | C9   | 1.399 (3) | C16  | C17  | 1.526 (3) |
| C5   | C6   | 1.383 (3) | C17  | C18  | 1.539 (3) |
| C6   | C7   | 1.388 (3) | C18  | C19  | 1.534 (3) |
| C7   | C8   | 1.378 (3) | C19  | C20  | 1.522 (3) |
| C8   | C9   | 1.399 (3) |      |      |           |

**Table S5 Bond Angles for 230653lt\_auto.**

| Atom | Atom | Atom | Angle/°     | Atom | Atom | Atom | Angle/°     |
|------|------|------|-------------|------|------|------|-------------|
| C3   | C2   | C11  | 126.81 (17) | C4   | C9   | C10  | 120.16 (16) |
| C3   | C2   | O1   | 122.93 (17) | C8   | C9   | C10  | 118.37 (16) |
| O1   | C2   | C11  | 110.20 (15) | O1   | C10  | C9   | 116.71 (15) |
| C2   | C3   | C4   | 117.56 (17) | O15  | C10  | C9   | 126.41 (17) |
| C2   | C3   | C16  | 123.34 (17) | O15  | C10  | O1   | 116.87 (16) |
| C4   | C3   | C16  | 119.00 (17) | O12  | C11  | C2   | 110.84 (15) |
| C5   | C4   | C3   | 122.88 (17) | O14  | C11  | C2   | 124.12 (17) |
| C9   | C4   | C3   | 119.55 (17) | O14  | C11  | O12  | 125.04 (17) |
| C9   | C4   | C5   | 117.52 (17) | C3   | C16  | C17  | 112.32 (17) |
| C6   | C5   | C4   | 120.81 (18) | C16  | C17  | C18  | 112.15 (17) |
| C5   | C6   | C7   | 120.76 (18) | C19  | C18  | C17  | 114.70 (18) |
| C8   | C7   | C6   | 119.71 (18) | C20  | C19  | C18  | 112.53 (19) |
| C7   | C8   | C9   | 119.73 (17) | C10  | O1   | C2   | 122.92 (14) |
| C4   | C9   | C8   | 121.43 (17) | C11  | O12  | C13  | 115.68 (15) |

**Table S6 Torsion Angles for 230653lt\_auto.**

| A  | B  | C  | D  | Angle/°     | A  | B  | C  | D   | Angle/°  |
|----|----|----|----|-------------|----|----|----|-----|----------|
| C2 | C3 | C4 | C5 | 179.02 (18) | C7 | C8 | C9 | C4  | -0.5 (3) |
| C2 | C3 | C4 | C9 | -3.5 (3)    | C7 | C8 | C9 | C10 | -        |

|             |             |               |  |  |             |
|-------------|-------------|---------------|--|--|-------------|
|             |             |               |  |  | 178.42 (16) |
| C2C3 C16C17 | -100.8 (2)  | C8 C9 C10 O1  |  |  | 179.76 (15) |
| C2C11O12C13 | 179.05 (15) | C8 C9 C10 O15 |  |  | -1.0 (3)    |
| C3C2 C11O12 | 165.30 (18) | C9 C4 C5 C6   |  |  | -0.8 (3)    |
| C3C2 C11O14 | 14.6 (3)    | C9 C10O1 C2   |  |  | -4.0 (2)    |
| C3C2 O1 C10 | 2.3 (3)     | C11C2 C3 C4   |  |  | 178.50 (17) |
| C3C4 C5 C6  | 176.77 (18) | C11C2 C3 C16  |  |  | 2.2 (3)     |
| C3C4 C9 C8  | 176.05 (17) | C11C2 O1 C10  |  |  | 175.07 (15) |
| C3C4 C9 C10 | 1.8 (3)     | C16C3 C4 C5   |  |  | -4.6 (3)    |
| C3C16C17C18 | 169.21 (17) | C16C3 C4 C9   |  |  | 172.92 (17) |
| C4C3 C16C17 | 83.0 (2)    | C16C17C18C19  |  |  | -64.4 (2)   |
| C4C5 C6 C7  | -1.1 (3)    | C17C18C19C20  |  |  | 174.06 (19) |
| C4C9 C10O1  | 1.9 (2)     | O1 C2 C3 C4   |  |  | 1.6 (3)     |
| C4C9 C10O15 | 178.94 (18) | O1 C2 C3 C16  |  |  | 174.69 (17) |
| C5C4 C9 C8  | 1.6 (3)     | O1 C2 C11O12  |  |  | 12.0 (2)    |
| C5C4 C9 C10 | 179.40 (17) | O1 C2 C11O14  |  |  | 168.17 (17) |
| C5C6 C7 C8  | 2.1 (3)     | O14C11O12C13  |  |  | -0.8 (3)    |
| C6C7 C8 C9  | -1.3 (3)    | O15C10O1 C2   |  |  | 176.74 (16) |

**Table S7 Hydrogen Atom Coordinates ( $\text{\AA}\times 10^4$ ) and Isotropic Displacement Parameters ( $\text{\AA}^2\times 10^3$ ) for 230653lt\_auto.**

| Atom | x       | y        | z       | U(eq) |
|------|---------|----------|---------|-------|
| H5   | 1106.43 | -1812.86 | 6554.7  | 35    |
| H6   | -94.53  | -2729.59 | 4425    | 35    |
| H7   | -749.97 | -2212.59 | 1721.81 | 31    |
| H8   | -91.87  | -801.21  | 1130.47 | 29    |
| H13A | 3361.26 | 3528.63  | 6564.97 | 47    |

**Table S7 Hydrogen Atom Coordinates ( $\text{\AA}\times 10^4$ ) and Isotropic Displacement Parameters ( $\text{\AA}^2\times 10^3$ ) for 230653lt\_auto.**

| Atom | <i>x</i> | <i>y</i> | <i>z</i> | U(eq) |
|------|----------|----------|----------|-------|
| H13B | 4437.67  | 2871.4   | 7639.41  | 47    |
| H13C | 3289.84  | 3060.49  | 8184.12  | 47    |
| H16A | 1494.91  | -687.08  | 8295.31  | 36    |
| H16B | 2376.65  | 176.01   | 8889.99  | 36    |
| H17A | 4076.15  | -671.35  | 8985.01  | 40    |
| H17B | 3243.19  | -1513.68 | 8075.87  | 40    |
| H18A | 2671.89  | -1753.54 | 10421.56 | 42    |
| H18B | 4107.46  | -1879.73 | 10851.64 | 42    |
| H19A | 4409.81  | -359.93  | 11990.25 | 40    |
| H19B | 2980.58  | -317.44  | 11690.42 | 40    |
| H20A | 3215.01  | -1546.87 | 13543.99 | 69    |
| H20B | 4070.89  | -711.39  | 14434.1  | 69    |
| H20C | 4646.78  | -1575.56 | 13855.8  | 69    |

### Experimental

Single crystals of  $\text{C}_{16}\text{H}_{18}\text{O}_4$  [230653lt\_auto] were [ ]. A suitable crystal was selected and [ ] on a XtaLAB Synergy R, DW system, HyPix-Arc 150 diffractometer. The crystal was kept at 99.99(10) K during data collection. Using Olex2 [1], the structure was solved with the SHELXT [2] structure solution program using Intrinsic Phasing and refined with the SHELXL [3] refinement package using Least Squares minimisation.

1. Dolomanov, O.V., Bourhis, L.J., Gildea, R.J, Howard, J.A.K. & Puschmann, H. (2009), J. Appl. Cryst. 42, 339-341.
2. Sheldrick, G.M. (2015). Acta Cryst. A71, 3-8.
3. Sheldrick, G.M. (2015). Acta Cryst. C71, 3-8.

### Crystal structure determination of [230653lt\_auto]

**Crystal Data** for  $\text{C}_{16}\text{H}_{18}\text{O}_4$  ( $M=274.30$  g/mol): monoclinic, space group  $P2_1/c$  (no. 14),  $a = 11.7049(3)$  Å,  $b = 14.6860(3)$  Å,  $c = 8.72913(18)$  Å,  $\beta = 110.758(2)^\circ$ ,  $V = 1403.13(5)$  Å<sup>3</sup>,  $Z = 4$ ,  $T = 99.99(10)$  K,  $\mu(\text{Cu K}\alpha) = 0.760$  mm<sup>-1</sup>,  $D_{\text{calc}} = 1.299$  g/cm<sup>3</sup>, 9347 reflections measured ( $8.078^\circ \leq 2\theta \leq 149.82^\circ$ ), 2744 unique ( $R_{\text{int}} = 0.0224$ ,  $R_{\text{sigma}} = 0.0244$ ) which were used in all calculations. The final  $R_1$  was 0.0517 ( $I > 2\sigma(I)$ ) and  $wR_2$  was 0.1386 (all data).

### Refinement model description

Number of restraints - 0, number of constraints - unknown.

Details:

1. Fixed Uiso

At 1.2 times of:

All C(H) groups, All C(H,H) groups

At 1.5 times of:

All C(H,H,H) groups

2.a Secondary CH2 refined with riding coordinates:

C16(H16A,H16B), C17(H17A,H17B), C18(H18A,H18B), C19(H19A,H19B)

2.b Aromatic/amide H refined with riding coordinates:

C5(H5), C6(H6), C7(H7), C8(H8)

2.c Idealised Me refined as rotating group:

C13(H13A,H13B,H13C), C20(H20A,H20B,H20C)

This report has been created with Olex2, compiled on 2023.03.06 svn.rbb2c1857 for OlexSys. Please [let us know](#) if there are any errors or if you would like to have additional features.

### X-ray single crystallographic data of the compounds 4d

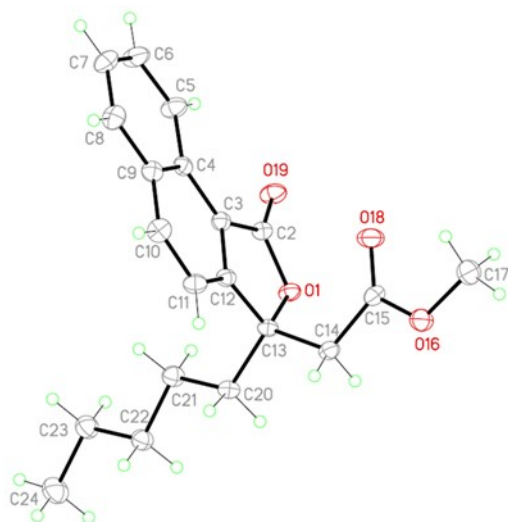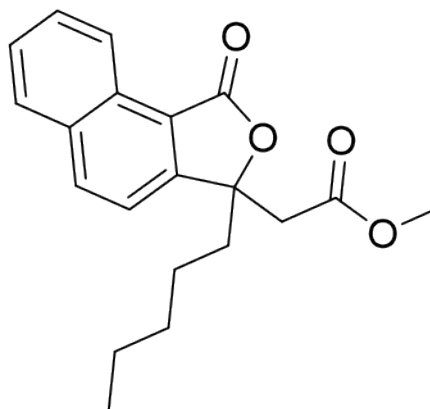

CCDC 2343594

### X-ray single crystallographic data of the compounds 4d

#### Table S8 Crystal data and structure refinement for 240370lt\_auto.

Identification code 240370lt\_auto

|                                             |                                                               |
|---------------------------------------------|---------------------------------------------------------------|
| Empirical formula                           | C <sub>20</sub> H <sub>22</sub> O <sub>4</sub>                |
| Formula weight                              | 326.37                                                        |
| Temperature/K                               | 99.98(10)                                                     |
| Crystal system                              | triclinic                                                     |
| Space group                                 | P-1                                                           |
| a/Å                                         | 7.4776(2)                                                     |
| b/Å                                         | 9.1826(2)                                                     |
| c/Å                                         | 12.9115(3)                                                    |
| α/°                                         | 83.847(2)                                                     |
| β/°                                         | 78.595(2)                                                     |
| γ/°                                         | 81.772(2)                                                     |
| Volume/Å <sup>3</sup>                       | 857.25(4)                                                     |
| Z                                           | 2                                                             |
| ρ <sub>calc</sub> /cm <sup>3</sup>          | 1.264                                                         |
| μ/mm <sup>-1</sup>                          | 0.707                                                         |
| F(000)                                      | 348.0                                                         |
| Crystal size/mm <sup>3</sup>                | 0.21 × 0.13 × 0.1                                             |
| Radiation                                   | Cu Kα (λ = 1.54184)                                           |
| 2θ range for data collection/°              | 7.008 to 134.136                                              |
| Index ranges                                | -7 ≤ h ≤ 8, -10 ≤ k ≤ 10, -15 ≤ l ≤ 15                        |
| Reflections collected                       | 10200                                                         |
| Independent reflections                     | 3011 [R <sub>int</sub> = 0.0318, R <sub>sigma</sub> = 0.0226] |
| Data/restraints/parameters                  | 3011/0/219                                                    |
| Goodness-of-fit on F <sup>2</sup>           | 1.069                                                         |
| Final R indexes [I ≥ 2σ (I)]                | R <sub>1</sub> = 0.0352, wR <sub>2</sub> = 0.0892             |
| Final R indexes [all data]                  | R <sub>1</sub> = 0.0426, wR <sub>2</sub> = 0.0943             |
| Largest diff. peak/hole / e Å <sup>-3</sup> | 0.28/-0.24                                                    |

**Table S9 Fractional Atomic Coordinates (×10<sup>4</sup>) and Equivalent Isotropic Displacement Parameters (Å<sup>2</sup>×10<sup>3</sup>) for 240370lt\_auto. U<sub>eq</sub> is defined as 1/3 of the trace of the orthogonalised U<sub>IJ</sub> tensor.**

| Atom | x           | y          | z          | U(eq)    |
|------|-------------|------------|------------|----------|
| O1   | 4486.7 (11) | 4785.7 (9) | 6262.5 (6) | 17.2 (2) |

|     |             |              |              |          |
|-----|-------------|--------------|--------------|----------|
| O16 | 1535.7 (13) | 1112.0 (10)  | 7189.1 (7)   | 25.0 (2) |
| O18 | 3446.3 (15) | 2342.6 (11)  | 7789.1 (8)   | 31.3 (3) |
| O19 | 6760.2 (11) | 5215.6 (10)  | 7043.6 (7)   | 22.8 (2) |
| C2  | 5126.3 (16) | 5267.8 (13)  | 7066.9 (9)   | 16.6 (3) |
| C3  | 3536.7 (16) | 5801.9 (13)  | 7865.9 (9)   | 15.5 (3) |
| C4  | 3472.8 (16) | 6394.7 (13)  | 8846.9 (9)   | 16.3 (3) |
| C5  | 5024.8 (17) | 6684.0 (15)  | 9224.0 (10)  | 23.1 (3) |
| C6  | 4818.3 (19) | 7265.3 (16)  | 10181.8 (11) | 27.3 (3) |
| C7  | 3066.0 (19) | 7567.4 (15)  | 10813.7 (10) | 25.3 (3) |
| C8  | 1545.6 (18) | 7300.0 (15)  | 10466.2 (10) | 22.9 (3) |
| C9  | 1693.6 (17) | 6721.8 (13)  | 9474.2 (9)   | 18.1 (3) |
| C10 | 110.1 (17)  | 6470.3 (14)  | 9096.7 (10)  | 21.3 (3) |
| C11 | 219.3 (17)  | 5934.0 (14)  | 8132.4 (10)  | 19.2 (3) |
| C12 | 1979.6 (16) | 5597.1 (13)  | 7523.9 (9)   | 15.6 (3) |
| C13 | 2481.8 (16) | 4994.9 (13)  | 6452.4 (9)   | 16.3 (3) |
| C14 | 1810.1 (17) | 3508.3 (13)  | 6411.9 (10)  | 19.1 (3) |
| C15 | 2384.0 (17) | 2296.4 (14)  | 7210.9 (9)   | 19.3 (3) |
| C17 | 2012 (2)    | -145.6 (15)  | 7906.7 (11)  | 29.5 (3) |
| C20 | 1845.6 (16) | 6082.5 (14)  | 5565.5 (9)   | 18.1 (3) |
| C21 | 2685.5 (17) | 7524.5 (14)  | 5378.9 (10)  | 20.8 (3) |
| C22 | 2176.6 (17) | 8464.5 (14)  | 4408.6 (10)  | 20.7 (3) |
| C23 | 3035.6 (19) | 9904.9 (14)  | 4201.7 (10)  | 23.7 (3) |
| C24 | 2514 (2)    | 10856.2 (16) | 3239.3 (12)  | 31.4 (3) |

**Table S10 Anisotropic Displacement Parameters ( $\text{\AA}^2 \times 10^3$ ) for 240370lt\_auto.**

**The Anisotropic displacement factor exponent takes the form: -**

$$2\pi^2[h^2a^*U_{11}+2hka^*b^*U_{12}+...].$$

| Atom | $U_{11}$ | $U_{22}$ | $U_{33}$ | $U_{23}$ | $U_{13}$  | $U_{12}$ |
|------|----------|----------|----------|----------|-----------|----------|
| O1   | 14.8 (4) | 22.6 (4) | 15.3 (4) | -4.5 (3) | -4.2 (3)  | -1.7 (3) |
| O16  | 33.3 (5) | 18.7 (5) | 26.8 (5) | 3.4 (4)  | -13.4 (4) | -8.4 (4) |
| O18  | 45.1 (6) | 24.7 (5) | 31.6 (5) | 3.0 (4)  | -24.6 (5) | -8.8 (4) |
| O19  | 14.7 (5) | 33.5 (5) | 21.7 (5) | -8.7 (4) | -4.2 (3)  | -1.7 (4) |
| C2   | 17.4 (6) | 18.2 (6) | 15.1 (6) | -1.9 (4) | -4.9 (5)  | -2.4 (5) |

|     |          |          |          |          |           |          |
|-----|----------|----------|----------|----------|-----------|----------|
| C3  | 16.4 (6) | 14.9 (6) | 15.4 (6) | 0.4 (4)  | -3.4 (5)  | -2.7 (4) |
| C4  | 18.8 (6) | 14.9 (6) | 15.1 (6) | 0.3 (4)  | -3.6 (5)  | -2.3 (5) |
| C5  | 16.8 (6) | 32.2 (7) | 21.6 (7) | -7.4 (5) | -4.6 (5)  | -2.0 (5) |
| C6  | 24.2 (7) | 37.1 (8) | 24.2 (7) | -9.3 (6) | -9.4 (5)  | -4.0 (6) |
| C7  | 31.0 (7) | 28.8 (7) | 17.5 (6) | -7.5 (5) | -4.5 (5)  | -4.5 (6) |
| C8  | 23.6 (7) | 25.8 (7) | 17.8 (6) | -3.8 (5) | 1.2 (5)   | -3.5 (5) |
| C9  | 19.8 (6) | 17.2 (6) | 16.8 (6) | 0.5 (5)  | -2.0 (5)  | -4.0 (5) |
| C10 | 15.9 (6) | 26.1 (7) | 20.7 (6) | -2.2 (5) | 1.3 (5)   | -4.6 (5) |
| C11 | 15.1 (6) | 23.6 (6) | 19.9 (6) | -0.9 (5) | -4.2 (5)  | -5.3 (5) |
| C12 | 17.9 (6) | 13.8 (6) | 15.4 (6) | 1.6 (4)  | -4.3 (5)  | -3.7 (4) |
| C13 | 13.7 (6) | 19.8 (6) | 16.4 (6) | -1.1 (5) | -4.9 (4)  | -2.7 (5) |
| C14 | 22.0 (6) | 20.1 (6) | 17.6 (6) | -1.8 (5) | -7.8 (5)  | -4.2 (5) |
| C15 | 22.6 (6) | 19.2 (6) | 17.1 (6) | -3.7 (5) | -4.7 (5)  | -3.1 (5) |
| C17 | 43.0 (8) | 19.3 (7) | 28.1 (7) | 4.6 (5)  | -12.5 (6) | -6.8 (6) |
| C20 | 16.5 (6) | 21.9 (6) | 16.7 (6) | -0.6 (5) | -5.3 (5)  | -2.6 (5) |
| C21 | 21.3 (6) | 22.1 (6) | 19.4 (6) | 0.4 (5)  | -5.5 (5)  | -3.4 (5) |
| C22 | 22.6 (6) | 21.1 (6) | 18.8 (6) | -0.3 (5) | -5.8 (5)  | -2.6 (5) |
| C23 | 24.9 (7) | 22.0 (7) | 24.5 (7) | 0.1 (5)  | -6.2 (5)  | -3.7 (5) |
| C24 | 37.4 (8) | 25.1 (7) | 32.8 (8) | 6.7 (6)  | -11.2 (6) | -7.4 (6) |

**Table S11 Bond Lengths for 240370lt\_auto.**

| Atom | Atom | Length/Å    | Atom | Atom | Length/Å    |
|------|------|-------------|------|------|-------------|
| O1   | C2   | 1.3635 (14) | C7   | C8   | 1.3636 (19) |
| O1   | C13  | 1.4583 (14) | C8   | C9   | 1.4168 (17) |
| O16  | C15  | 1.3406 (15) | C9   | C10  | 1.4226 (18) |
| O16  | C17  | 1.4500 (15) | C10  | C11  | 1.3708 (18) |
| O18  | C15  | 1.2005 (16) | C11  | C12  | 1.4044 (17) |
| O19  | C2   | 1.2103 (15) | C12  | C13  | 1.5033 (16) |
| C2   | C3   | 1.4746 (16) | C13  | C14  | 1.5298 (17) |
| C3   | C4   | 1.4211 (16) | C13  | C20  | 1.5394 (16) |
| C3   | C12  | 1.3674 (17) | C14  | C15  | 1.5097 (17) |
| C4   | C5   | 1.4120 (17) | C20  | C21  | 1.5217 (17) |
| C4   | C9   | 1.4240 (17) | C21  | C22  | 1.5238 (17) |



**Table S11 Bond Lengths for 240370lt\_auto.**

| Atom | Atom | Length/Å    | Atom | Atom | Length/Å    |
|------|------|-------------|------|------|-------------|
| C5   | C6   | 1.3714 (18) | C22  | C23  | 1.5274 (18) |
| C6   | C7   | 1.4075 (19) | C23  | C24  | 1.5233 (18) |

**Table S12 Bond Angles for 240370lt\_auto.**

| Atom | Atom | Atom | Angle/°     | Atom | Atom | Atom | Angle/°     |
|------|------|------|-------------|------|------|------|-------------|
| C2   | O1   | C13  | 110.95 (9)  | C10  | C11  | C12  | 117.46 (11) |
| C15  | O16  | C17  | 115.29 (10) | C3   | C12  | C11  | 121.90 (11) |
| O1   | C2   | C3   | 108.42 (10) | C3   | C12  | C13  | 109.89 (10) |
| O19  | C2   | O1   | 120.89 (11) | C11  | C12  | C13  | 128.20 (11) |
| O19  | C2   | C3   | 130.69 (11) | O1   | C13  | C12  | 103.03 (9)  |
| C4   | C3   | C2   | 130.25 (11) | O1   | C13  | C14  | 108.59 (10) |
| C12  | C3   | C2   | 107.57 (10) | O1   | C13  | C20  | 108.60 (9)  |
| C12  | C3   | C4   | 122.16 (11) | C12  | C13  | C14  | 114.24 (10) |
| C3   | C4   | C9   | 116.23 (11) | C12  | C13  | C20  | 113.15 (10) |
| C5   | C4   | C3   | 124.79 (11) | C14  | C13  | C20  | 108.90 (9)  |
| C5   | C4   | C9   | 118.97 (11) | C15  | C14  | C13  | 115.50 (10) |
| C6   | C5   | C4   | 120.39 (12) | O16  | C15  | C14  | 110.08 (10) |
| C5   | C6   | C7   | 120.89 (12) | O18  | C15  | O16  | 123.31 (12) |
| C8   | C7   | C6   | 119.83 (12) | O18  | C15  | C14  | 126.62 (12) |
| C7   | C8   | C9   | 121.14 (12) | C21  | C20  | C13  | 115.04 (10) |
| C8   | C9   | C4   | 118.76 (11) | C20  | C21  | C22  | 112.13 (10) |
| C8   | C9   | C10  | 121.43 (11) | C21  | C22  | C23  | 112.69 (10) |
| C10  | C9   | C4   | 119.81 (11) | C24  | C23  | C22  | 112.89 (11) |
| C11  | C10  | C9   | 122.40 (11) |      |      |      |             |

**Table S13 Torsion Angles for 240370lt\_auto.**

| A  | B  | C  | D   | Angle/°     | A  | B  | C  | D  | Angle/°   |
|----|----|----|-----|-------------|----|----|----|----|-----------|
| O1 | C2 | C3 | C4  | 179.31 (11) | C6 | C7 | C8 | C9 | -0.1 (2)  |
| O1 | C2 | C3 | C12 | 1.13 (13)   | C7 | C8 | C9 | C4 | 1.15 (19) |

|              |             |               |             |
|--------------|-------------|---------------|-------------|
| O1 C13C14C15 | 59.76 (13)  | C7 C8 C9 C10  | -           |
|              |             |               | 178.62 (12) |
| O1 C13C20C21 | -51.71 (13) | C8 C9 C10C11  | 178.94 (12) |
| O19C2 C3 C4  | -0.8 (2)    | C9 C4 C5 C6   | 0.26 (19)   |
| O19C2 C3 C12 | -           | C9 C10C11C12  | 1.57 (19)   |
|              | 179.02 (13) |               |             |
| C2 O1 C13C12 | -3.13 (12)  | C10C11 C12C3  | -0.54 (18)  |
| C2 O1 C13C14 | -           | C10C11 C12C13 | 179.73 (12) |
|              | 124.62 (10) |               |             |
| C2 O1 C13C20 | 117.10 (10) | C11C12 C13O1  | -           |
|              |             |               | 176.41 (11) |
| C2 C3 C4 C5  | 4.6 (2)     | C11C12 C13C14 | -58.83 (16) |
| C2 C3 C4 C9  | -           | C11C12 C13C20 | 66.53 (15)  |
|              | 176.01 (11) |               |             |
| C2 C3 C12C11 | 177.10 (11) | C12C3 C4 C5   | -           |
|              |             |               | 177.48 (12) |
| C2 C3 C12C13 | -3.13 (13)  | C12C3 C4 C9   | 1.95 (17)   |
| C3 C4 C5 C6  | 179.68 (12) | C12C13 C14C15 | -54.59 (14) |
| C3 C4 C9 C8  | 179.31 (11) | C12C13 C20C21 | 62.03 (13)  |
| C3 C4 C9 C10 | -0.92 (17)  | C13O1 C2 O19  | -           |
|              |             |               | 178.46 (11) |
| C3 C12C13O1  | 3.84 (12)   | C13O1 C2 C3   | 1.42 (13)   |
| C3 C12C13C14 | 121.42 (11) | C13C14 C15O16 | 172.40 (10) |
| C3 C12C13C20 | -           | C13C14 C15O18 | -8.00 (19)  |
|              | 113.22 (11) |               |             |
| C4 C3 C12C11 | -1.27 (18)  | C13C20 C21C22 | 173.15 (10) |
| C4 C3 C12C13 | 178.50 (10) | C14C13 C20C21 | -           |
|              |             |               | 169.79 (10) |
| C4 C5 C6 C7  | 0.8 (2)     | C17O16C15O18  | -1.09 (18)  |
| C4 C9 C10C11 | -0.83 (19)  | C17O16C15C14  | 178.52 (11) |
| C5 C4 C9 C8  | -1.23 (17)  | C20C13 C14C15 | 177.84 (10) |
| C5 C4 C9 C10 | 178.55 (11) | C20C21 C22C23 | -           |
|              |             |               | 179.10 (10) |
| C5 C6 C7 C8  | -0.9 (2)    | C21C22 C23C24 | -           |
|              |             |               | 179.38 (11) |

**Table S14 Hydrogen Atom Coordinates ( $\text{\AA}\times 10^4$ ) and Isotropic Displacement Parameters ( $\text{\AA}^2\times 10^3$ ) for 240370lt\_auto.**

| Atom | <i>x</i> | <i>y</i> | <i>z</i> | U(eq) |
|------|----------|----------|----------|-------|
| H5   | 6218.98  | 6474.62  | 8811.79  | 28    |
| H6   | 5872.32  | 7466.97  | 10422.16 | 33    |
| H7   | 2942.82  | 7956.47  | 11480.45 | 30    |
| H8   | 366.76   | 7504.98  | 10896.62 | 27    |
| H10  | -1066.01 | 6681.61  | 9528.66  | 26    |
| H11  | -854.87  | 5795.62  | 7885.16  | 23    |
| H14A | 450.39   | 3659.13  | 6520.83  | 23    |
| H14B | 2270.84  | 3172.01  | 5693.01  | 23    |
| H17A | 3322.07  | -505.39  | 7707.34  | 44    |
| H17B | 1279.24  | -933.3   | 7864.56  | 44    |
| H17C | 1758.08  | 151.84   | 8633.34  | 44    |
| H20A | 2148.01  | 5587.78  | 4896.92  | 22    |
| H20B | 491.21   | 6314.56  | 5739.71  | 22    |
| H21A | 4040.54  | 7303.28  | 5283.09  | 25    |
| H21B | 2255.29  | 8091     | 6011.29  | 25    |
| H22A | 822.08   | 8696.2   | 4510.36  | 25    |
| H22B | 2587.81  | 7889.46  | 3779.39  | 25    |
| H23A | 2635.47  | 10473.94 | 4834.44  | 28    |
| H23B | 4390.52  | 9672.1   | 4092.71  | 28    |
| H24A | 2957.4   | 10317.16 | 2603.98  | 47    |
| H24B | 3075.86  | 11773.13 | 3153.62  | 47    |
| H24C | 1173.73  | 11090.46 | 3341.29  | 47    |
